# Supplementary material
Source: Research Square preprint supplement (doi:10.21203/rs.3.rs-9200516/v1)
Supplement: Supplementary file 1 [file 1c869d7b88583e433618c319.xlsx]

## Sheet: Calculated values (2)
Weight%	Mg			Ca			Mn			Fe			Sr			SUM		Na	S	P	Ba	K	Ce	Si	Al	O	C	S+Al+Si+P	Na+K+Ba+Ce	Total	X	Y	Z	Comment	Point#
15 / 1 .	0.8394	0.0345361	0.0353707	37.3714	0.932467	0.955	0.3869	0.00704248	0.00721266	0.055	0.000984869	0.00100867	0.1205	0.00137526	0.00140849	1		0	0.0212	0.0191	0	0.0163	0	0	0.0812	47.7754	12	0.1215	0.0163	98.827	-5127	31742	304	SV5_1	15
16 / 1 .	0.4523	0.0186093	0.0205805	35.304	0.880882	0.974187	0.0851	0.00154902	0.00171309	0.1263	0.00226162	0.00250117	0.0807	0.000921023	0.00101858	1		0	0	0	0.0205	0.1183	0	3.3635	0.3685	50.6785	12	3.732	0.1388	102.704	-5188	31699	304	SV5_2	16
17 / 1 .	0.6185	0.0254474	0.0260916	37.6178	0.938615	0.962373	0.4615	0.00840038	0.00861301	0.0651	0.00116573	0.00119523	0.1476	0.00168455	0.00172719	1		0	0.0232	0.0204	0	0	0.0606	0	0.2167	47.8504	12	0.2603	0.0606	99.121	-4677	31765	304	SV5_3	17
18 / 1 .	0.4557	0.0187492	0.0197989	36.4964	0.910634	0.961614	0.3996	0.00727365	0.00768085	0.4376	0.00783597	0.00827465	0.2184	0.00249258	0.00263212	1		0	0	0.0161	0	0.1155	0	0.7509	0.4253	48.4127	12	1.1923	0.1155	99.7369	2269	32808	315	SV5_4	18
19 / 1 .	0.2185	0.00898992	0.00930162	38.003	0.948226	0.981103	0.2929	0.00533146	0.00551632	0.0778	0.00139314	0.00144144	0.2234	0.00254965	0.00263805	1		0	0	0.0291	0	0.0233	0	0.0381	0.0416	47.5666	12	0.1088	0.0233	98.5302	2295	32750	315	SV5_5	19
20 / 1 .	0.3944	0.0162271	0.0172015	36.9772	0.922631	0.978035	0.1068	0.00194401	0.00206075	0.1424	0.00254991	0.00270304	0	0	0	1		0	0	0.014	0	0.1312	0	0.7807	0.5072	48.4769	12	1.3019	0.1312	99.6349	2119	32747	315	SV5_6	20
21 / 1 .	0.3765	0.0154906	0.0164089	37.0006	0.923215	0.977939	0.0593	0.0010794	0.00114338	0.2377	0.00425642	0.00450873	0	0	0	1		0.2104	0	0.0428	0	0.1739	0	0.821	0.5079	48.6488	12	1.3717	0.3843	100.128	10983	30270	307	SV5_7	21
22 / 1 .	0.352	0.0144826	0.0152108	37.2054	0.928325	0.975002	0.1928	0.00350941	0.00368587	0.2659	0.00476139	0.0050008	0.0918	0.00104771	0.00110039	1		0	0	0	0.0185	0.0962	0	0.6254	0.3108	48.2553	12	0.9362	0.1147	99.5188	10345	29851	307	SV5_8	22
23 / 1 .	0.2958	0.0121703	0.0136767	34.9397	0.871793	0.9797	0.104	0.00189304	0.00212736	0.2234	0.00400036	0.00449551	0	0	0	1		0	0	0.0159	0.0265	0.3101	0	2.2644	0.9981	49.7819	12	3.2784	0.3366	101.007	10127	30734	307	SV5_9	23
24 / 1 .	0.5492	0.0225962	0.0235655	36.9356	0.921593	0.961126	0.4483	0.00816011	0.00851015	0.1899	0.00340048	0.00354635	0.2732	0.00311801	0.00325176	1		0	0	0.0253	0	0.0866	0	0.7492	0.2742	48.463	12	1.0487	0.0866	99.9968	-14252	31765	293	SV5_10	24
25 / 1 .	0.6567	0.0270191	0.027872	37.0714	0.924981	0.954179	0.6341	0.0115421	0.0119064	0.1544	0.0027648	0.00285207	0.271	0.0030929	0.00319053	1		0	0	0.0185	0	0.0475	0	0.3706	0.2164	48.1439	12	0.6055	0.0475	99.5957	-13878	31321	293	SV5_11	25
26 / 1 .	0.4821	0.0198354	0.0208062	36.8261	0.918861	0.963832	0.4495	0.00818195	0.00858239	0.1545	0.00276659	0.00290199	0.3239	0.00369664	0.00387757	1		0	0	0.0344	0	0.0664	0	0.4391	0.2724	48.0242	12	0.7459	0.0664	99.0756	-13786	31104	293	SV5_12	26
27 / 1 .	0.432	0.0177741	0.0185758	37.1094	0.925929	0.967693	0.5802	0.010561	0.0110373	0.104	0.0018623	0.00194629	0.0627	0.00071559	0.000747866	1		0	0.0217	0.0313	0	0.0791	0	0.4161	0.2804	48.1213	12	0.7495	0.0791	99.3263	-13213	31218	293	SV5_13	27
28 / 1 .	0.4688	0.0192882	0.0202158	36.7693	0.917443	0.961564	0.633	0.0115221	0.0120762	0.1494	0.00267526	0.00280392	0.2792	0.00318649	0.00333973	1		0.1316	0	0.0314	0	0.056	0	0.3454	0.3006	48.0123	12	0.6774	0.1876	99.189	-15379	30774	285	SV5_14	28
29 / 1 .	0.4733	0.0194734	0.0204028	36.8679	0.919904	0.963808	0.5524	0.010055	0.0105349	0.1037	0.00185693	0.00194555	0.2767	0.00315795	0.00330868	1		0	0	0.0187	0	0.0419	0	0.1806	0.1047	47.5829	12	0.304	0.0419	98.2097	-16245	30903	285	SV5_15	29
30 / 1 .	0.4501	0.0185188	0.0191651	37.3076	0.930875	0.96336	0.5695	0.0103662	0.010728	0.1428	0.00255708	0.00264631	0.3472	0.00396257	0.00410085	1		0	0	0.0434	0	0.0518	0	0.2834	0.2003	48.0089	12	0.5271	0.0518	99.4364	-16140	30359	285	SV5_16	30
31 / 1 .	0.3224	0.0132648	0.0141091	36.5719	0.912518	0.9706	0.5175	0.00941971	0.0100193	0.1863	0.00333602	0.00354836	0.142	0.00162063	0.00172379	1		0	0.0163	0.0362	0	0.1542	0	0.5872	0.6923	48.3998	12	1.332	0.1542	99.6261	-528	20813	270	SV5_17	31
32 / 1 .	0.4625	0.019029	0.0199662	36.6766	0.91513	0.960201	0.7759	0.0141232	0.0148188	0.1311	0.00234757	0.00246319	0.213	0.00243095	0.00255068	1		0	0	0.0405	0	0.0994	0	0.6387	0.3464	48.3514	12	1.0256	0.0994	99.7838	-518	20843	270	SV5_18	32
33 / 1 .	0.3509	0.0144374	0.0146978	38.239	0.954114	0.971326	0.6692	0.012181	0.0124007	0	0	0	0.1356	0.00154759	0.00157551	1		0	0	0.0245	0	0.0456	0	0.0562	0.0745	47.8952	12	0.1552	0.0456	99.5713	-622	20883	270	SV5_19	33
	Mg	Ca	Mn	Fe	Sr	Comment	Ca	Mg	Mn	Fe	Sr
15 / 1 .	3.53707	95.5	0.721266	0.100867	0.140849	SV-5 micrite	95.5 - 98.1	0.9 - 3.5	0.4 - 0.9	0.1 - 0.5	0.1 - 0.3		Red: below detection limit (excluded)
17 / 1 .	2.60916	96.2373	0.861301	0.119523	0.172719	SV-5 micrite	96.8369	2.14937	0.625696	0.216154	0.171853
19 / 1 .	0.930162	98.1103	0.551632	0.144144	0.263805	SV-5 micrite
22 / 1 .	1.52108	97.5002	0.368587	0.50008	0.110039	SV-5 micrite
25 / 1 .	2.7872	95.4179	1.19064	0.285207	0.319053	SV-5 sheaf-like crystals	95.4 - 97.7	1.5 - 2.8	0.9 - 1.2	0.0 - 0.3	0.1 - 0.4
26 / 1 .	2.08062	96.3832	0.858239	0.290199	0.387757	SV-5 sheaf-like crystals	96.368	2.02479	1.1038	0.215659	0.287725
27 / 1 .	1.85758	96.7693	1.10373	0.194629	0.0747866	SV-5 sheaf-like crystals
28 / 1 .	2.02158	96.1564	1.20762	0.280392	0.333973	SV-5 sheaf-like crystals
29 / 1 .	2.04028	96.3808	1.05349	0.194555	0.330868	SV-5 sheaf-like crystals
30 / 1 .	1.91651	96.336	1.0728	0.264631	0.410085	SV-5 sheaf-like crystals
33 / 1 .	1.46978	97.1326	1.24007	0	0.157551	SV-5 sheaf-like crystals

## Sheet: Calculated values
Weight%	Mg			Ca			Mn			Fe			Sr			SUM		Na	S	P	Ba	K	Ce	Si	Al	O	C	S+Al+Si+P	Na+K+Ba+Ce	Total	X	Y	Z	Comment	Point#
15 / 1 .	0.8394	0.0345361	0.0353707	37.3714	0.932467	0.955	0.3869	0.00704248	0.00721266	0.055	0.000984869	0.00100867	0.1205	0.00137526	0.00140849	1		0	0.0212	0.0191	0	0.0163	0	0	0.0812	47.7754	12	0.1215	0.0163	98.827	-5127	31742	304	SV5_1	15
16 / 1 .	0.4523	0.0186093	0.0205805	35.304	0.880882	0.974187	0.0851	0.00154902	0.00171309	0.1263	0.00226162	0.00250117	0.0807	0.000921023	0.00101858	1		0	0	0	0.0205	0.1183	0	3.3635	0.3685	50.6785	12	3.732	0.1388	102.704	-5188	31699	304	SV5_2	16
17 / 1 .	0.6185	0.0254474	0.0260916	37.6178	0.938615	0.962373	0.4615	0.00840038	0.00861301	0.0651	0.00116573	0.00119523	0.1476	0.00168455	0.00172719	1		0	0.0232	0.0204	0	0	0.0606	0	0.2167	47.8504	12	0.2603	0.0606	99.121	-4677	31765	304	SV5_3	17
18 / 1 .	0.4557	0.0187492	0.0197989	36.4964	0.910634	0.961614	0.3996	0.00727365	0.00768085	0.4376	0.00783597	0.00827465	0.2184	0.00249258	0.00263212	1		0	0	0.0161	0	0.1155	0	0.7509	0.4253	48.4127	12	1.1923	0.1155	99.7369	2269	32808	315	SV5_4	18
19 / 1 .	0.2185	0.00898992	0.00930162	38.003	0.948226	0.981103	0.2929	0.00533146	0.00551632	0.0778	0.00139314	0.00144144	0.2234	0.00254965	0.00263805	1		0	0	0.0291	0	0.0233	0	0.0381	0.0416	47.5666	12	0.1088	0.0233	98.5302	2295	32750	315	SV5_5	19
20 / 1 .	0.3944	0.0162271	0.0172015	36.9772	0.922631	0.978035	0.1068	0.00194401	0.00206075	0.1424	0.00254991	0.00270304	0	0	0	1		0	0	0.014	0	0.1312	0	0.7807	0.5072	48.4769	12	1.3019	0.1312	99.6349	2119	32747	315	SV5_6	20
21 / 1 .	0.3765	0.0154906	0.0164089	37.0006	0.923215	0.977939	0.0593	0.0010794	0.00114338	0.2377	0.00425642	0.00450873	0	0	0	1		0.2104	0	0.0428	0	0.1739	0	0.821	0.5079	48.6488	12	1.3717	0.3843	100.128	10983	30270	307	SV5_7	21
22 / 1 .	0.352	0.0144826	0.0152108	37.2054	0.928325	0.975002	0.1928	0.00350941	0.00368587	0.2659	0.00476139	0.0050008	0.0918	0.00104771	0.00110039	1		0	0	0	0.0185	0.0962	0	0.6254	0.3108	48.2553	12	0.9362	0.1147	99.5188	10345	29851	307	SV5_8	22
23 / 1 .	0.2958	0.0121703	0.0136767	34.9397	0.871793	0.9797	0.104	0.00189304	0.00212736	0.2234	0.00400036	0.00449551	0	0	0	1		0	0	0.0159	0.0265	0.3101	0	2.2644	0.9981	49.7819	12	3.2784	0.3366	101.007	10127	30734	307	SV5_9	23
24 / 1 .	0.5492	0.0225962	0.0235655	36.9356	0.921593	0.961126	0.4483	0.00816011	0.00851015	0.1899	0.00340048	0.00354635	0.2732	0.00311801	0.00325176	1		0	0	0.0253	0	0.0866	0	0.7492	0.2742	48.463	12	1.0487	0.0866	99.9968	-14252	31765	293	SV5_10	24
25 / 1 .	0.6567	0.0270191	0.027872	37.0714	0.924981	0.954179	0.6341	0.0115421	0.0119064	0.1544	0.0027648	0.00285207	0.271	0.0030929	0.00319053	1		0	0	0.0185	0	0.0475	0	0.3706	0.2164	48.1439	12	0.6055	0.0475	99.5957	-13878	31321	293	SV5_11	25
26 / 1 .	0.4821	0.0198354	0.0208062	36.8261	0.918861	0.963832	0.4495	0.00818195	0.00858239	0.1545	0.00276659	0.00290199	0.3239	0.00369664	0.00387757	1		0	0	0.0344	0	0.0664	0	0.4391	0.2724	48.0242	12	0.7459	0.0664	99.0756	-13786	31104	293	SV5_12	26
27 / 1 .	0.432	0.0177741	0.0185758	37.1094	0.925929	0.967693	0.5802	0.010561	0.0110373	0.104	0.0018623	0.00194629	0.0627	0.00071559	0.000747866	1		0	0.0217	0.0313	0	0.0791	0	0.4161	0.2804	48.1213	12	0.7495	0.0791	99.3263	-13213	31218	293	SV5_13	27
28 / 1 .	0.4688	0.0192882	0.0202158	36.7693	0.917443	0.961564	0.633	0.0115221	0.0120762	0.1494	0.00267526	0.00280392	0.2792	0.00318649	0.00333973	1		0.1316	0	0.0314	0	0.056	0	0.3454	0.3006	48.0123	12	0.6774	0.1876	99.189	-15379	30774	285	SV5_14	28
29 / 1 .	0.4733	0.0194734	0.0204028	36.8679	0.919904	0.963808	0.5524	0.010055	0.0105349	0.1037	0.00185693	0.00194555	0.2767	0.00315795	0.00330868	1		0	0	0.0187	0	0.0419	0	0.1806	0.1047	47.5829	12	0.304	0.0419	98.2097	-16245	30903	285	SV5_15	29
30 / 1 .	0.4501	0.0185188	0.0191651	37.3076	0.930875	0.96336	0.5695	0.0103662	0.010728	0.1428	0.00255708	0.00264631	0.3472	0.00396257	0.00410085	1		0	0	0.0434	0	0.0518	0	0.2834	0.2003	48.0089	12	0.5271	0.0518	99.4364	-16140	30359	285	SV5_16	30
31 / 1 .	0.3224	0.0132648	0.0141091	36.5719	0.912518	0.9706	0.5175	0.00941971	0.0100193	0.1863	0.00333602	0.00354836	0.142	0.00162063	0.00172379	1		0	0.0163	0.0362	0	0.1542	0	0.5872	0.6923	48.3998	12	1.332	0.1542	99.6261	-528	20813	270	SV5_17	31
32 / 1 .	0.4625	0.019029	0.0199662	36.6766	0.91513	0.960201	0.7759	0.0141232	0.0148188	0.1311	0.00234757	0.00246319	0.213	0.00243095	0.00255068	1		0	0	0.0405	0	0.0994	0	0.6387	0.3464	48.3514	12	1.0256	0.0994	99.7838	-518	20843	270	SV5_18	32
33 / 1 .	0.3509	0.0144374	0.0146978	38.239	0.954114	0.971326	0.6692	0.012181	0.0124007	0	0	0	0.1356	0.00154759	0.00157551	1		0	0	0.0245	0	0.0456	0	0.0562	0.0745	47.8952	12	0.1552	0.0456	99.5713	-622	20883	270	SV5_19	33
	Mg	Ca	Mn	Fe	Sr	Comment	Ca	Mg	Mn	Fe	Sr
15 / 1 .	3.53707	95.5	0.721266	0.100867	0.140849	SV-5 micrite	95.5 - 98.1	0.9 - 3.5	0.2 - 0.9	0.1 - 0.8	0.0 - 0.3
16 / 1 .	2.05805	97.4187	0.171309	0.250117	0.101858	SV-5 micrite
17 / 1 .	2.60916	96.2373	0.861301	0.119523	0.172719	SV-5 micrite
18 / 1 .	1.97989	96.1614	0.768085	0.827465	0.263212	SV-5 micrite
19 / 1 .	0.930162	98.1103	0.551632	0.144144	0.263805	SV-5 micrite
20 / 1 .	1.72015	97.8035	0.206075	0.270304	0	SV-5 micrite
21 / 1 .	1.64089	97.7939	0.114338	0.450873	0	SV-5 micrite
22 / 1 .	1.52108	97.5002	0.368587	0.50008	0.110039	SV-5 micrite
23 / 1 .	1.36767	97.97	0.212736	0.449551	0	SV-5 micrite
24 / 1 .	2.35655	96.1126	0.851015	0.354635	0.325176	SV-5 sheaf-like crystals	95.4 - 97.7	1.4 - 2.8	0.9 - 1.5	0.0 - 0.4	0.1 - 0.4
25 / 1 .	2.7872	95.4179	1.19064	0.285207	0.319053	SV-5 sheaf-like crystals
26 / 1 .	2.08062	96.3832	0.858239	0.290199	0.387757	SV-5 sheaf-like crystals
27 / 1 .	1.85758	96.7693	1.10373	0.194629	0.0747866	SV-5 sheaf-like crystals
28 / 1 .	2.02158	96.1564	1.20762	0.280392	0.333973	SV-5 sheaf-like crystals
29 / 1 .	2.04028	96.3808	1.05349	0.194555	0.330868	SV-5 sheaf-like crystals
30 / 1 .	1.91651	96.336	1.0728	0.264631	0.410085	SV-5 sheaf-like crystals
31 / 1 .	1.41091	97.06	1.00193	0.354836	0.172379	SV-5 sheaf-like crystals
32 / 1 .	1.99662	96.0201	1.48188	0.246319	0.255068	SV-5 sheaf-like crystals
33 / 1 .	1.46978	97.1326	1.24007	0	0.157551	SV-5 sheaf-like crystals

## Sheet: Calculations Det. Limit
Weight%	Mg	Ca	Mn	Fe	Sr	Na	S	P	Ba	K	Ce	Si	Al	Comment	Point#
15 / 1 .	0.008394	0.373714	0.003869	0.00055	0.001205	0.000689	0.000212	0.000191	0.000102	0.000163	0.000456	0.00016	0.000812	SV5_1	15
16 / 1 .	0.004523	0.35304	0.000851	0.001263	0.000807	0.000449	0.000121	0.00011	0.000205	0.001183	0.00038	0.033635	0.003685	SV5_2	16
17 / 1 .	0.006185	0.376178	0.004615	0.000651	0.001476	0.000296	0.000232	0.000204	9.7e-05	0	0.000606	0	0.002167	SV5_3	17
18 / 1 .	0.004557	0.364964	0.003996	0.004376	0.002184	0	8.5e-05	0.000161	0	0.001155	0	0.007509	0.004253	SV5_4	18
19 / 1 .	0.002185	0.38003	0.002929	0.000778	0.002234	0	6.1e-05	0.000291	9.8e-05	0.000233	0	0.000381	0.000416	SV5_5	19
20 / 1 .	0.003944	0.369772	0.001068	0.001424	7.8e-05	0.00032	3.8e-05	0.00014	0.00014	0.001312	0.000466	0.007807	0.005072	SV5_6	20
21 / 1 .	0.003765	0.370006	0.000593	0.002377	0	0.002104	0.000116	0.000428	0.000111	0.001739	0.000261	0.00821	0.005079	SV5_7	21
22 / 1 .	0.00352	0.372054	0.001928	0.002659	0.000918	0.000821	4.4e-05	2.2e-05	0.000185	0.000962	0.000161	0.006254	0.003108	SV5_8	22
23 / 1 .	0.002958	0.349397	0.00104	0.002234	0.000392	0	8.2e-05	0.000159	0.000265	0.003101	0	0.022644	0.009981	SV5_9	23
24 / 1 .	0.005492	0.369356	0.004483	0.001899	0.002732	0	2.2e-05	0.000253	0	0.000866	0	0.007492	0.002742	SV5_10	24
25 / 1 .	0.006567	0.370714	0.006341	0.001544	0.00271	0	0.000101	0.000185	1.1e-05	0.000475	0	0.003706	0.002164	SV5_11	25
26 / 1 .	0.004821	0.368261	0.004495	0.001545	0.003239	0	0	0.000344	3e-05	0.000664	0	0.004391	0.002724	SV5_12	26
27 / 1 .	0.00432	0.371094	0.005802	0.00104	0.000627	0.000826	0.000217	0.000313	5.4e-05	0.000791	0	0.004161	0.002804	SV5_13	27
28 / 1 .	0.004688	0.367693	0.00633	0.001494	0.002792	0.001316	0.00012	0.000314	0	0.00056	0	0.003454	0.003006	SV5_14	28
29 / 1 .	0.004733	0.368679	0.005524	0.001037	0.002767	0	6.8e-05	0.000187	0	0.000419	0	0.001806	0.001047	SV5_15	29
30 / 1 .	0.004501	0.373076	0.005695	0.001428	0.003472	0.000315	0	0.000434	0	0.000518	0	0.002834	0.002003	SV5_16	30
31 / 1 .	0.003224	0.365719	0.005175	0.001863	0.00142	0	0.000163	0.000362	0	0.001542	0	0.005872	0.006923	SV5_17	31
32 / 1 .	0.004625	0.366766	0.007759	0.001311	0.00213	0.000418	6.4e-05	0.000405	0	0.000994	0	0.006387	0.003464	SV5_18	32
33 / 1 .	0.003509	0.38239	0.006692	0.000121	0.001356	0.000568	9.4e-05	0.000245	2.3e-05	0.000456	0	0.000562	0.000745	SV5_19	33
Det.Lim ppm	Mg	Ca	Mn	Fe	Sr	Na	S	P	Ba	K	Ce	Si	Al	Comment	Point#
15 / 1 .	0.000566	0.000119	0.000314	0.000361	0.00044	0.001077	0.000121	0.000146	0.00015	0.000102	0.000647	0.000237	0.000262	SV5_1	15
16 / 1 .	0.000634	0.00012	0.000343	0.000363	0.000444	0.001019	0.000142	0.000136	0.000148	9.6e-05	0.000667	0.000248	0.000263	SV5_2	16
17 / 1 .	0.000604	0.000119	0.000325	0.00036	0.000418	0.001193	0.00012	0.000134	0.000147	0.000123	0.000603	0.000269	0.000245	SV5_3	17
18 / 1 .	0.000566	0.000122	0.000318	0.000339	0.000451	0.001221	0.000128	0.000134	0.00015	0.000103	0.000732	0.000237	0.000239	SV5_4	18
19 / 1 .	0.000617	0.000127	0.000338	0.000349	0.000372	0.001015	0.000153	0.000132	0.000154	0.00011	0.000653	0.000229	0.000262	SV5_5	19
20 / 1 .	0.000638	0.000128	0.000342	0.000372	0.000474	0.001003	0.00014	0.00013	0.000149	0.000108	0.000695	0.000227	0.000235	SV5_6	20
21 / 1 .	0.000531	0.000116	0.000376	0.000337	0.000467	0.000915	0.000136	0.000121	0.000146	0.000111	0.000645	0.00023	0.000268	SV5_7	21
22 / 1 .	0.000529	0.000123	0.000313	0.000362	0.000442	0.001039	0.000133	0.000153	0.000148	0.000112	0.000713	0.000233	0.000244	SV5_8	22
23 / 1 .	0.00065	0.000116	0.000345	0.000369	0.00046	0.001191	0.000128	0.00015	0.000147	0.000116	0.00065	0.000212	0.00024	SV5_9	23
24 / 1 .	0.00056	0.000121	0.000319	0.000349	0.000447	0.001276	0.000144	0.00014	0.000152	0.000112	0.000724	0.000261	0.000267	SV5_10	24
25 / 1 .	0.0005	0.000122	0.000311	0.000404	0.000408	0.001089	0.000121	0.000143	0.000155	0.000109	0.000699	0.000216	0.000236	SV5_11	25
26 / 1 .	0.000556	0.000121	0.000338	0.000371	0.000423	0.001235	0.000152	0.000112	0.000155	0.000113	0.000666	0.000241	0.000261	SV5_12	26
27 / 1 .	0.000569	0.000123	0.000316	0.000362	0.000512	0.001043	0.000116	0.000116	0.000154	0.000109	0.000766	0.000229	0.000264	SV5_13	27
28 / 1 .	0.00061	0.000118	0.000346	0.000352	0.00043	0.001113	0.000131	0.000125	0.000152	0.000103	0.000716	0.000227	0.000262	SV5_14	28
29 / 1 .	0.000637	0.000124	0.000335	0.000375	0.000428	0.001503	0.000132	0.000142	0.000152	0.000112	0.000731	0.000275	0.000268	SV5_15	29
30 / 1 .	0.000612	0.000123	0.000337	0.000335	0.00038	0.001041	0.000144	0.000125	0.000152	0.00011	0.000729	0.00021	0.000218	SV5_16	30
31 / 1 .	0.000586	0.000122	0.000337	0.000364	0.000446	0.001161	0.000137	0.000126	0.000156	0.0001	0.000738	0.000234	0.000246	SV5_17	31
32 / 1 .	0.00061	0.000117	0.000324	0.000358	0.000433	0.00123	0.000122	0.000126	0.000154	0.000107	0.000663	0.000231	0.000273	SV5_18	32
33 / 1 .	0.000543	0.00012	0.000322	0.000396	0.000449	0.001133	0.000128	0.000131	0.000154	0.000106	0.000669	0.000228	0.000227	SV5_19	33
	Mg	Ca	Mn	Fe	Sr	Na	S	P	Ba	K	Ce	Si	Al	Comment	Point#
15 / 1 .	0.007828	0.373595	0.003555	0.000189	0.000765	-0.000388	9.1e-05	4.5e-05	-4.8e-05	6.1e-05	-0.000191	-7.7e-05	0.00055	SV5_1	15
16 / 1 .	0.003889	0.35292	0.000508	0.0009	0.000363	-0.00057	-2.1e-05	-2.6e-05	5.7e-05	0.001087	-0.000287	0.033387	0.003422	SV5_2	16
17 / 1 .	0.005581	0.376059	0.00429	0.000291	0.001058	-0.000897	0.000112	7e-05	-5e-05	-0.000123	3e-06	-0.000269	0.001922	SV5_3	17
18 / 1 .	0.003991	0.364842	0.003678	0.004037	0.001733	-0.001221	-4.3e-05	2.7e-05	-0.00015	0.001052	-0.000732	0.007272	0.004014	SV5_4	18
19 / 1 .	0.001568	0.379903	0.002591	0.000429	0.001862	-0.001015	-9.2e-05	0.000159	-5.6e-05	0.000123	-0.000653	0.000152	0.000154	SV5_5	19
20 / 1 .	0.003306	0.369644	0.000726	0.001052	-0.000396	-0.000683	-0.000102	1e-05	-9e-06	0.001204	-0.000229	0.00758	0.004837	SV5_6	20
21 / 1 .	0.003234	0.36989	0.000217	0.00204	-0.000467	0.001189	-2e-05	0.000307	-3.5e-05	0.001628	-0.000384	0.00798	0.004811	SV5_7	21
22 / 1 .	0.002991	0.371931	0.001615	0.002297	0.000476	-0.000218	-8.9e-05	-0.000131	3.7e-05	0.00085	-0.000552	0.006021	0.002864	SV5_8	22
23 / 1 .	0.002308	0.349281	0.000695	0.001865	-6.8e-05	-0.001191	-4.6e-05	9e-06	0.000118	0.002985	-0.00065	0.022432	0.009741	SV5_9	23
24 / 1 .	0.004932	0.369235	0.004164	0.00155	0.002285	-0.001276	-0.000122	0.000113	-0.000152	0.000754	-0.000724	0.007231	0.002475	SV5_10	24
25 / 1 .	0.006067	0.370592	0.00603	0.00114	0.002302	-0.001089	-2e-05	4.2e-05	-0.000144	0.000366	-0.000699	0.00349	0.001928	SV5_11	25
26 / 1 .	0.004265	0.36814	0.004157	0.001174	0.002816	-0.001235	-0.000152	0.000232	-0.000125	0.000551	-0.000666	0.00415	0.002463	SV5_12	26
27 / 1 .	0.003751	0.370971	0.005486	0.000678	0.000115	-0.000217	0.000101	0.000197	-0.0001	0.000682	-0.000766	0.003932	0.00254	SV5_13	27
28 / 1 .	0.004078	0.367575	0.005984	0.001142	0.002362	0.000203	-1.1e-05	0.000189	-0.000152	0.000457	-0.000716	0.003227	0.002744	SV5_14	28
29 / 1 .	0.004096	0.368555	0.005189	0.000662	0.002339	-0.001503	-6.4e-05	4.5e-05	-0.000152	0.000307	-0.000731	0.001531	0.000779	SV5_15	29
30 / 1 .	0.003889	0.372953	0.005358	0.001093	0.003092	-0.000726	-0.000144	0.000309	-0.000152	0.000408	-0.000729	0.002624	0.001785	SV5_16	30
31 / 1 .	0.002638	0.365597	0.004838	0.001499	0.000974	-0.001161	2.6e-05	0.000236	-0.000156	0.001442	-0.000738	0.005638	0.006677	SV5_17	31
32 / 1 .	0.004015	0.366649	0.007435	0.000953	0.001697	-0.000812	-5.8e-05	0.000279	-0.000154	0.000887	-0.000663	0.006156	0.003191	SV5_18	32
33 / 1 .	0.002966	0.38227	0.00637	-0.000275	0.000907	-0.000565	-3.4e-05	0.000114	-0.000131	0.00035	-0.000669	0.000334	0.000518	SV5_19	33

## Sheet: Weight%
Weight%	Mg	Ca	Mn	Fe	Sr	Na	S	P	Ba	K	Ce	Si	Al	O	C	Total	X	Y	Z	Comment	Point#
15 / 1 .	0.8394	37.3714	0.3869	0.055	0.1205	0.0689	0.0212	0.0191	0.0102	0.0163	0.0456	0.016	0.0812	47.7754	12	98.827	-5127	31742	304	SV5_1	15
16 / 1 .	0.4523	35.304	0.0851	0.1263	0.0807	0.0449	0.0121	0.011	0.0205	0.1183	0.038	3.3635	0.3685	50.6785	12	102.704	-5188	31699	304	SV5_2	16
17 / 1 .	0.6185	37.6178	0.4615	0.0651	0.1476	0.0296	0.0232	0.0204	0.0097	0	0.0606	0	0.2167	47.8504	12	99.121	-4677	31765	304	SV5_3	17
18 / 1 .	0.4557	36.4964	0.3996	0.4376	0.2184	0	0.0085	0.0161	0	0.1155	0	0.7509	0.4253	48.4127	12	99.7369	2269	32808	315	SV5_4	18
19 / 1 .	0.2185	38.003	0.2929	0.0778	0.2234	0	0.0061	0.0291	0.0098	0.0233	0	0.0381	0.0416	47.5666	12	98.5302	2295	32750	315	SV5_5	19
20 / 1 .	0.3944	36.9772	0.1068	0.1424	0.0078	0.032	0.0038	0.014	0.014	0.1312	0.0466	0.7807	0.5072	48.4769	12	99.6349	2119	32747	315	SV5_6	20
21 / 1 .	0.3765	37.0006	0.0593	0.2377	0	0.2104	0.0116	0.0428	0.0111	0.1739	0.0261	0.821	0.5079	48.6488	12	100.128	10983	30270	307	SV5_7	21
22 / 1 .	0.352	37.2054	0.1928	0.2659	0.0918	0.0821	0.0044	0.0022	0.0185	0.0962	0.0161	0.6254	0.3108	48.2553	12	99.5188	10345	29851	307	SV5_8	22
23 / 1 .	0.2958	34.9397	0.104	0.2234	0.0392	0	0.0082	0.0159	0.0265	0.3101	0	2.2644	0.9981	49.7819	12	101.007	10127	30734	307	SV5_9	23
24 / 1 .	0.5492	36.9356	0.4483	0.1899	0.2732	0	0.0022	0.0253	0	0.0866	0	0.7492	0.2742	48.463	12	99.9968	-14252	31765	293	SV5_10	24
25 / 1 .	0.6567	37.0714	0.6341	0.1544	0.271	0	0.0101	0.0185	0.0011	0.0475	0	0.3706	0.2164	48.1439	12	99.5957	-13878	31321	293	SV5_11	25
26 / 1 .	0.4821	36.8261	0.4495	0.1545	0.3239	0	0	0.0344	0.003	0.0664	0	0.4391	0.2724	48.0242	12	99.0756	-13786	31104	293	SV5_12	26
27 / 1 .	0.432	37.1094	0.5802	0.104	0.0627	0.0826	0.0217	0.0313	0.0054	0.0791	0	0.4161	0.2804	48.1213	12	99.3263	-13213	31218	293	SV5_13	27
28 / 1 .	0.4688	36.7693	0.633	0.1494	0.2792	0.1316	0.012	0.0314	0	0.056	0	0.3454	0.3006	48.0123	12	99.189	-15379	30774	285	SV5_14	28
29 / 1 .	0.4733	36.8679	0.5524	0.1037	0.2767	0	0.0068	0.0187	0	0.0419	0	0.1806	0.1047	47.5829	12	98.2097	-16245	30903	285	SV5_15	29
30 / 1 .	0.4501	37.3076	0.5695	0.1428	0.3472	0.0315	0	0.0434	0	0.0518	0	0.2834	0.2003	48.0089	12	99.4364	-16140	30359	285	SV5_16	30
31 / 1 .	0.3224	36.5719	0.5175	0.1863	0.142	0	0.0163	0.0362	0	0.1542	0	0.5872	0.6923	48.3998	12	99.6261	-528	20813	270	SV5_17	31
32 / 1 .	0.4625	36.6766	0.7759	0.1311	0.213	0.0418	0.0064	0.0405	0	0.0994	0	0.6387	0.3464	48.3514	12	99.7838	-518	20843	270	SV5_18	32
33 / 1 .	0.3509	38.239	0.6692	0.0121	0.1356	0.0568	0.0094	0.0245	0.0023	0.0456	0	0.0562	0.0745	47.8952	12	99.5713	-622	20883	270	SV5_19	33

## Sheet: Oxides
Oxide	MgO	Na2O	CaO	SO3	P2O5	BaO	K2O	MnO	FeO	SrO	Ce2O3	SiO2	Al2O3	CO2	Total	X	Y	Z	Comment	Point#
15 / 1 .	1.3919	0.0929	52.2901	0.0529	0.0438	0.0113	0.0196	0.4995	0.0708	0.1425	0.0534	0.0343	0.1535	43.9706	98.827	-5127	31742	304	SV5_1	15
16 / 1 .	0.7501	0.0605	49.3974	0.0301	0.0253	0.0229	0.1425	0.1099	0.1625	0.0954	0.0445	7.1957	0.6963	43.9706	102.704	-5188	31699	304	SV5_2	16
17 / 1 .	1.0256	0.0399	52.6348	0.058	0.0467	0.0108	0	0.5959	0.0838	0.1745	0.071	0	0.4095	43.9706	99.121	-4677	31765	304	SV5_3	17
18 / 1 .	0.7557	0	51.0657	0.0213	0.037	0	0.1391	0.5159	0.563	0.2583	0	1.6065	0.8036	43.9706	99.7369	2269	32808	315	SV5_4	18
19 / 1 .	0.3623	0	53.1738	0.0152	0.0667	0.011	0.0281	0.3782	0.1001	0.2642	0	0.0816	0.0785	43.9706	98.5302	2295	32750	315	SV5_5	19
20 / 1 .	0.654	0.0431	51.7385	0.0096	0.0322	0.0157	0.1581	0.1379	0.1831	0.0092	0.0546	1.6702	0.9583	43.9706	99.6349	2119	32747	315	SV5_6	20
21 / 1 .	0.6244	0.2836	51.7713	0.0289	0.0981	0.0124	0.2095	0.0766	0.3058	0	0.0305	1.7565	0.9596	43.9706	100.128	10983	30270	307	SV5_7	21
22 / 1 .	0.5837	0.1107	52.0577	0.011	0.0049	0.0207	0.1159	0.2489	0.3421	0.1086	0.0189	1.338	0.5872	43.9706	99.5188	10345	29851	307	SV5_8	22
23 / 1 .	0.4906	0	48.8877	0.0206	0.0363	0.0296	0.3736	0.1342	0.2874	0.0463	0	4.8444	1.886	43.9706	101.007	10127	30734	307	SV5_9	23
24 / 1 .	0.9108	0	51.6802	0.0056	0.058	0	0.1043	0.5789	0.2443	0.3231	0	1.6029	0.5181	43.9706	99.9968	-14252	31765	293	SV5_10	24
25 / 1 .	1.0889	0	51.8703	0.0253	0.0425	0.0012	0.0572	0.8188	0.1986	0.3205	0	0.7928	0.4089	43.9706	99.5957	-13878	31321	293	SV5_11	25
26 / 1 .	0.7995	0	51.527	0	0.0788	0.0034	0.08	0.5804	0.1987	0.383	0	0.9395	0.5147	43.9706	99.0757	-13786	31104	293	SV5_12	26
27 / 1 .	0.7164	0.1113	51.9234	0.0542	0.0717	0.0061	0.0953	0.7492	0.1338	0.0741	0	0.8903	0.5298	43.9706	99.3263	-13213	31218	293	SV5_13	27
28 / 1 .	0.7774	0.1774	51.4476	0.03	0.0719	0	0.0675	0.8173	0.1921	0.3302	0	0.739	0.568	43.9706	99.189	-15379	30774	285	SV5_14	28
29 / 1 .	0.7849	0	51.5856	0.0171	0.0429	0	0.0505	0.7132	0.1334	0.3272	0	0.3865	0.1979	43.9706	98.2097	-16245	30903	285	SV5_15	29
30 / 1 .	0.7464	0.0425	52.2008	0	0.0993	0	0.0624	0.7354	0.1837	0.4105	0	0.6063	0.3784	43.9706	99.4364	-16140	30359	285	SV5_16	30
31 / 1 .	0.5346	0	51.1714	0.0408	0.083	0	0.1858	0.6682	0.2396	0.168	0	1.2562	1.3081	43.9706	99.6261	-528	20813	270	SV5_17	31
32 / 1 .	0.767	0.0564	51.3179	0.0159	0.0928	0	0.1197	1.0019	0.1687	0.2519	0	1.3664	0.6546	43.9706	99.7838	-518	20843	270	SV5_18	32
33 / 1 .	0.5819	0.0766	53.504	0.0234	0.0562	0.0026	0.0549	0.8641	0.0155	0.1603	0	0.1203	0.1408	43.9706	99.5713	-622	20883	270	SV5_19	33

## Sheet: Std Dev wt%
StdDev wt%	Mg	Na	Ca	S	P	Ba	K	Mn	Fe	Sr	Ce	Si	Al	O	C	X	Y	Z	Comment	Point#
15 / 1 .	0.1917	0.2234	0.4629	0.019	0.0348	0.0455	0.0224	0.0872	0.0776	0.1318	0.146	0.0471	0.0709			-5127	31742	304	SV5_1	15
16 / 1 .	0.1664	0.2041	0.447	0.0206	0.0317	0.0451	0.0286	0.0723	0.0829	0.131	0.1495	0.1793	0.0995			-5188	31699	304	SV5_2	16
17 / 1 .	0.178	0.2349	0.4658	0.019	0.0325	0.0445	-0.0001	0.0929	0.0779	0.1281	0.1382	0	0.0831			-4677	31765	304	SV5_3	17
18 / 1 .	0.1581	0	0.455	0.018	0.0317	0	0.029	0.0884	0.0964	0.1411	0	0.0897	0.1011			2269	32808	315	SV5_4	18
19 / 1 .	0.1418	-0.0003	0.4709	0.0208	0.0338	0.0468	0.0244	0.0851	0.0769	0.1211	0	0.0472	0.0662			2295	32750	315	SV5_5	19
20 / 1 .	0.1616	0.1998	0.4603	0.0189	0.0309	0.0453	0.0305	0.0737	0.0852	0.1348	0.1555	0.0903	0.108			2119	32747	315	SV5_6	20
21 / 1 .	0.1461	0.2329	0.4603	0.0195	0.0341	0.0443	0.0331	0.0762	0.085	-0.0003	0.1433	0.0923	0.1115			10983	30270	307	SV5_7	21
22 / 1 .	0.1432	0.2201	0.4617	0.018	0.0335	0.0451	0.0293	0.0746	0.0906	0.1308	0.1562	0.0833	0.0915			10345	29851	307	SV5_8	22
23 / 1 .	0.1532	0	0.4415	0.0183	0.0353	0.045	0.0404	0.0738	0.0894	0.1328	-0.0001	0.1441	0.1433			10127	30734	307	SV5_9	23
24 / 1 .	0.1673	-0.0002	0.4611	0.0193	0.0347	-0.0002	0.0289	0.0918	0.0841	0.1427	0	0.0924	0.0923			-14252	31765	293	SV5_10	24
25 / 1 .	0.1702	-0.0001	0.4615	0.0175	0.0343	0.0468	0.026	0.1007	0.0916	0.1332	-0.0002	0.0683	0.0813			-13878	31321	293	SV5_11	25
26 / 1 .	0.1604	0	0.4593	0	0.0309	0.0467	0.0279	0.0941	0.0857	0.1398	-0.0001	0.075	0.0904			-13786	31104	293	SV5_12	26
27 / 1 .	0.1567	0.2215	0.4612	0.0186	0.0311	0.0465	0.0278	0.0983	0.0809	0.1482	0	0.0722	0.0919			-13213	31218	293	SV5_13	27
28 / 1 .	0.1652	0.2449	0.4573	0.0189	0.0329	-0.0001	0.0254	0.1044	0.082	0.1387	0	0.0679	0.093			-15379	30774	285	SV5_14	28
29 / 1 .	0.1693	0	0.459	0.0182	0.0336	-0.0001	0.0261	0.0991	0.0834	0.1378	0	0.0648	0.0744			-16245	30903	285	SV5_15	29
30 / 1 .	0.1639	0.2072	0.4627	0	0.0349	-0.0007	0.0263	0.1001	0.0785	0.1307	0	0.062	0.0772			-16140	30359	285	SV5_16	30
31 / 1 .	0.148	0	0.4567	0.0202	0.0337	0	0.0305	0.0976	0.0864	0.135	0	0.0817	0.1235			-528	20813	270	SV5_17	31
32 / 1 .	0.1648	0.2442	0.4574	0.017	0.0345	0	0.0287	0.109	0.0819	0.1359	0	0.084	0.0995			-518	20843	270	SV5_18	32
33 / 1 .	0.1458	0.2312	0.4726	0.0181	0.0329	0.0464	0.0252	0.1039	0.0815	0.1351	0	0.0487	0.0634			-622	20883	270	SV5_19	33

## Sheet: Raw
Results
	Beam curr (nA)	Peak cnt (cps)	Pk-Bg (cps)	Bg1 cnt (cps)	Bg2 cnt (cps)	Ix/Istd	Weight%	Norm Weight%	Atomic%	Det.Lim ppm(G)	StdDev wt%
	15 / 1 . X = -5127.0 Y = 31742.0 Z = 304.0 Comment : SV5_1
Mg	6.1586	15.2503	12.4903	0	2.4	0.0105	0.8394	0.8507	0.6949	566	0.1917
Na	6.1586	1.3333	0.3627	0	0.9333	0.0061	0.0689	0.0698	0.0603	1077	0.2234
Ca	6.1586	5745.65	5731.55	15.9003	11.7002	2.0895	37.3714	37.8763	18.7606	119	0.4629
S	6.1586	3.0667	1.282	2.45	1.1	0.0015	0.0212	0.0215	0.0133	121	0.019
P	6.1586	2.8	0.8071	1.4	2.4	0.001	0.0191	0.0194	0.0124	146	0.0348
Ba	6.1586	18.7012	0.6401	0	17.201	0.0001	0.0102	0.0103	0.0015	150	0.0455
K	6.1586	9.4003	2.3601	0	6.4001	0.0016	0.0163	0.0165	0.0084	102	0.0224
Mn	6.1586	12.0255	8.5934	3.9001	0	0.0108	0.3869	0.3921	0.1417	314	0.0872
Fe	6.1586	6.2251	1.2091	0	4.4001	0.0007	0.055	0.0558	0.0198	361	0.0776
Sr	6.1586	6.4251	1.7245	0	3.95	0.0022	0.1205	0.1221	0.0277	440	0.1318
Ce	6.1586	2.25	0.325	0	1.8333	0.0006	0.0456	0.0462	0.0065	647	0.146
Si	6.1586	4.9	0.6265	0	3.85	0.0006	0.016	0.0162	0.0115	237	0.0471
Al	6.1586	5.15	2.1888	2.9	3	0.0072	0.0812	0.0823	0.0606	262	0.0709
O							47.7754	48.4208	60.0789
C							12	12	20.102
Total							98.827	100	100
Formula	Oxide
MgO	1.3919
Na2O	0.0929
CaO	52.2901
SO3	0.0529
P2O5	0.0438
BaO	0.0113
K2O	0.0196
MnO	0.4995
FeO	0.0708
SrO	0.1425
Ce2O3	0.0534
SiO2	0.0343
Al2O3	0.1535
CO2	43.9706
Total	98.827
	16 / 1 . X = -5188.0 Y = 31699.0 Z = 304.0 Comment : SV5_2
Mg	6.0258	10.0001	6.6651	0	2.9	0.0057	0.4523	0.4389	0.3572	634	0.1664
Na	6.0258	1.0667	0.2347	0	0.8	0.004	0.0449	0.0435	0.0375	1019	0.2041
Ca	6.0258	5287.65	5273.92	14.8003	12.3002	1.9651	35.304	34.2517	16.906	120	0.447
S	6.0258	3.0334	0.7008	2.85	1.8	0.0008	0.0121	0.0117	0.0072	142	0.0206
P	6.0258	2.05	0.4464	1.9	1.4	0.0006	0.011	0.0107	0.0068	136	0.0317
Ba	6.0258	18.1011	1.2652	0	16.0342	0.0003	0.0205	0.0199	0.0029	148	0.0451
K	6.0258	22.4017	16.3516	0	5.5001	0.0111	0.1183	0.1148	0.0581	96	0.0286
Mn	6.0258	5.7501	1.8487	4.4334	0	0.0024	0.0851	0.0826	0.0297	343	0.0723
Fe	6.0258	7.5752	2.7111	0	4.2667	0.0016	0.1263	0.1226	0.0434	363	0.0829
Sr	6.0258	5.775	1.134	0	3.9	0.0015	0.0807	0.0783	0.0177	444	0.131
Ce	6.0258	2.225	0.265	0	1.8667	0.0005	0.038	0.0368	0.0052	667	0.1495
Si	6.0258	133.757	129.261	0	4.05	0.1314	3.3635	3.2632	2.2985	248	0.1793
Al	6.0258	12.6502	9.8398	3.3	2.5	0.0332	0.3685	0.3575	0.2621	263	0.0995
O							50.6785	49.1679	60.7923
C							12	12	19.1754
Total							102.704	100	100
Formula	Oxide
MgO	0.7501
Na2O	0.0605
CaO	49.3974
SO3	0.0301
P2O5	0.0253
BaO	0.0229
K2O	0.1425
MnO	0.1099
FeO	0.1625
SrO	0.0954
Ce2O3	0.0445
SiO2	7.1957
Al2O3	0.6963
CO2	43.9706
Total	102.704
	17 / 1 . X = -4677.0 Y = 31765.0 Z = 304.0 Comment : SV5_3
Mg	6.122	12.2502	9.1452	0	2.7	0.0078	0.6185	0.6247	0.5114	604	0.178
Na	6.122	1.3333	0.1547	0	1.1333	0.0026	0.0296	0.0299	0.0259	1193	0.2349
Ca	6.122	5752.45	5738.53	15.2003	12.2002	2.1046	37.6178	37.9973	18.8611	119	0.4658
S	6.122	3.1	1.3972	1.9	1.5	0.0016	0.0232	0.0234	0.0145	120	0.019
P	6.122	2.5	0.8557	2	1.4	0.0011	0.0204	0.0206	0.0132	134	0.0325
Ba	6.122	17.651	0.6051	0	16.2342	0.0001	0.0097	0.0098	0.0014	147	0.0445
K	6.122	9.7503	-0.48	0	9.3003	-0.0003	0	0	0	123	-0.0001
Mn	6.122	13.8006	10.1926	4.1001	0	0.0129	0.4615	0.4661	0.1688	325	0.0929
Fe	6.122	6.3251	1.4231	0	4.3001	0.0008	0.0651	0.0658	0.0234	360	0.0779
Sr	6.122	6.3251	2.1005	0	3.55	0.0027	0.1476	0.1491	0.0338	418	0.1281
Ce	6.122	2.075	0.43	0	1.5667	0.0008	0.0606	0.0612	0.0087	603	0.1382
Si	6.122	4.7334	-0.7057	0	4.9	-0.0007	0	0	0	269	0
Al	6.122	8.4001	5.818	3.5	2	0.0193	0.2167	0.2189	0.1614	245	0.0831
O							47.8504	48.3332	60.0991
C							12	12	20.0772
Total							99.121	100	100
Formula	Oxide
MgO	1.0256
Na2O	0.0399
CaO	52.6348
SO3	0.058
P2O5	0.0467
BaO	0.0108
K2O	0
MnO	0.5959
FeO	0.0838
SrO	0.1745
Ce2O3	0.071
SiO2	0
Al2O3	0.4095
CO2	43.9706
Total	99.121
	18 / 1 . X = 2269.0 Y = 32808.0 Z = 315.0 Comment : SV5_4
Mg	6.1571	9.5501	6.7901	0	2.4	0.0057	0.4557	0.4571	0.3737	566	0.1581
Na	6.1571	0.9333	-0.3147	0	1.2	-0.0053	0	0	0	1221	0
Ca	6.1571	5606.47	5591.68	16.2003	12.9002	2.039	36.4964	36.6058	18.1462	122	0.455
S	6.1571	2.4667	0.5145	2.1	1.8	0.0006	0.0085	0.0086	0.0053	128	0.018
P	6.1571	2.3	0.6779	1.8	1.5	0.0008	0.0161	0.0162	0.0104	134	0.0317
Ba	6.1571	17.4177	-0.6784	0	17.2343	-0.0001	0	0	0	150	0
K	6.1571	23.8519	16.5917	0	6.6001	0.011	0.1155	0.1158	0.0588	103	0.029
Mn	6.1571	12.4005	8.8805	4.0001	0	0.0112	0.3996	0.4008	0.1449	318	0.0884
Fe	6.1571	14.0257	9.6176	0	3.8667	0.0054	0.4376	0.4389	0.1562	339	0.0964
Sr	6.1571	8.1251	3.1271	0	4.2	0.004	0.2184	0.2191	0.0497	451	0.1411
Ce	6.1571	2.15	-0.3	0	2.3333	-0.0006	0	0	0	732	0
Si	6.1571	33.6348	29.3613	0	3.85	0.0292	0.7509	0.7532	0.5328	237	0.0897
Al	6.1571	13.9503	11.5189	3.9	1.5	0.0381	0.4253	0.4266	0.3141	239	0.1011
O							48.4127	48.5579	60.2982
C							12	12	19.9097
Total							99.7369	100	100
Formula	Oxide
MgO	0.7557
Na2O	0
CaO	51.0657
SO3	0.0213
P2O5	0.037
BaO	0
K2O	0.1391
MnO	0.5159
FeO	0.563
SrO	0.2583
Ce2O3	0
SiO2	1.6065
Al2O3	0.8036
CO2	43.9706
Total	99.7369
	19 / 1 . X = 2295.0 Y = 32750.0 Z = 315.0 Comment : SV5_5
Mg	6.0457	6.3501	3.1875	0	2.75	0.0027	0.2185	0.2222	0.1818	617	0.1418
Na	6.0457	0.8	-0.032	0	0.8	-0.0005	0	0	0	1015	-0.0003
Ca	6.0457	5740.17	5724.85	17.2004	12.8002	2.1261	38.003	38.6485	19.1817	127	0.4709
S	6.0457	3.0667	0.3624	3	2.4	0.0004	0.0061	0.0062	0.0038	153	0.0208
P	6.0457	2.8	1.2107	0.7	2.2	0.0015	0.0291	0.0296	0.019	132	0.0338
Ba	6.0457	19.0179	0.6068	0	17.5344	0.0001	0.0098	0.01	0.0014	154	0.0468
K	6.0457	11.2504	3.3302	0	7.2002	0.0023	0.0233	0.0237	0.0121	110	0.0244
Mn	6.0457	10.2003	6.387	4.3334	0	0.0082	0.2929	0.2979	0.1078	338	0.0851
Fe	6.0457	6.2001	1.6781	0	3.9667	0.001	0.0778	0.0791	0.0282	349	0.0769
Sr	6.0457	6.4251	3.1525	0	2.75	0.0041	0.2234	0.2272	0.0516	372	0.1211
Ce	6.0457	1.65	-0.24	0	1.8	-0.0005	0	0	0	653	0
Si	6.0457	5.3	1.4705	0	3.45	0.0015	0.0381	0.0388	0.0275	229	0.0472
Al	6.0457	4	1.106	3.2	2.7	0.0037	0.0416	0.0423	0.0312	262	0.0662
O							47.5666	48.3746	60.1424
C							12	12	20.2115
Total							98.5302	100	100
Formula	Oxide
MgO	0.3623
Na2O	0
CaO	53.1738
SO3	0.0152
P2O5	0.0667
BaO	0.011
K2O	0.0281
MnO	0.3782
FeO	0.1001
SrO	0.2642
Ce2O3	0
SiO2	0.0816
Al2O3	0.0785
CO2	43.9706
Total	98.5302
	20 / 1 . X = 2119.0 Y = 32747.0 Z = 315.0 Comment : SV5_6
Mg	6.1204	9.3001	5.8501	0	3	0.005	0.3944	0.396	0.3229	638	0.1616
Na	6.1204	1	0.168	0	0.8	0.0029	0.032	0.0321	0.0277	1003	0.1998
Ca	6.1204	5644.06	5628.06	18.4004	12.8002	2.0646	36.9772	37.1312	18.3612	128	0.4603
S	6.1204	2.5334	0.2298	2.55	2.05	0.0003	0.0038	0.0038	0.0024	140	0.0189
P	6.1204	2.15	0.5872	1.8	1.4	0.0007	0.014	0.0141	0.009	130	0.0309
Ba	6.1204	18.4845	0.8785	0	16.7676	0.0002	0.014	0.0141	0.002	149	0.0453
K	6.1204	26.6023	18.7922	0	7.1002	0.0126	0.1312	0.1318	0.0668	108	0.0305
Mn	6.1204	6.3751	2.3564	4.5667	0	0.003	0.1068	0.1072	0.0387	342	0.0737
Fe	6.1204	8.3502	3.1062	0	4.6001	0.0018	0.1424	0.1429	0.0507	372	0.0852
Sr	6.1204	5.525	0.1105	0	4.55	0.0001	0.0078	0.0078	0.0018	474	0.1348
Ce	6.1204	2.5	0.33	0	2.0667	0.0006	0.0466	0.0468	0.0066	695	0.1555
Si	6.1204	34.2349	30.3498	0	3.5	0.0304	0.7807	0.784	0.5532	227	0.0903
Al	6.1204	16.0503	13.6742	3.6	1.6	0.0455	0.5072	0.5093	0.3741	235	0.108
O							48.4769	48.6788	60.2992
C							12	12	19.8837
Total							99.6349	100	100
Formula	Oxide
MgO	0.654
Na2O	0.0431
CaO	51.7385
SO3	0.0096
P2O5	0.0322
BaO	0.0157
K2O	0.1581
MnO	0.1379
FeO	0.1831
SrO	0.0092
Ce2O3	0.0546
SiO2	1.6702
Al2O3	0.9583
CO2	43.9706
Total	99.6349
	21 / 1 . X = 10983.0 Y = 30270.0 Z = 307.0 Comment : SV5_7
Mg	6.1265	8.0001	5.5851	0	2.1	0.0047	0.3765	0.376	0.3069	531	0.1461
Na	6.1265	1.8	1.1067	0	0.6667	0.0188	0.2104	0.2101	0.1813	915	0.2329
Ca	6.1265	5651.06	5637.88	14.6003	11.3002	2.0662	37.0006	36.947	18.2903	116	0.4603
S	6.1265	2.9	0.6928	2.7	1.7	0.0008	0.0116	0.0115	0.0071	136	0.0195
P	6.1265	3.15	1.7907	1.3	1.4	0.0022	0.0428	0.0428	0.0274	121	0.0341
Ba	6.1265	17.5677	0.6968	0	16.0675	0.0002	0.0111	0.0111	0.0016	146	0.0443
K	6.1265	33.1536	24.9034	0	7.5002	0.0166	0.1739	0.1737	0.0881	111	0.0331
Mn	6.1265	6.1501	1.31	5.5001	0	0.0017	0.0593	0.0592	0.0214	376	0.0762
Fe	6.1265	9.5253	5.1932	0	3.8	0.0029	0.2377	0.2374	0.0843	337	0.085
Sr	6.1265	5.225	-0.0705	0	4.45	-0.0001	0	0	0	467	-0.0003
Ce	6.1265	2.075	0.185	0	1.8	0.0004	0.0261	0.026	0.0037	645	0.1433
Si	6.1265	35.935	31.939	0	3.6	0.0319	0.821	0.8198	0.5792	230	0.0923
Al	6.1265	16.7004	13.7004	3	3	0.0455	0.5079	0.5071	0.3729	268	0.1115
O							48.6488	48.5783	60.2413
C							12	12	19.7944
Total							100.128	100	100
Formula	Oxide
MgO	0.6244
Na2O	0.2836
CaO	51.7713
SO3	0.0289
P2O5	0.0981
BaO	0.0124
K2O	0.2095
MnO	0.0766
FeO	0.3058
SrO	0
Ce2O3	0.0305
SiO2	1.7565
Al2O3	0.9596
CO2	43.9706
Total	100.128
	22 / 1 . X = 10345.0 Y = 29851.0 Z = 307.0 Comment : SV5_8
Mg	6.151	7.6501	5.2351	0	2.1	0.0044	0.352	0.3539	0.2892	529	0.1432
Na	6.151	1.3333	0.432	0	0.8667	0.0073	0.0821	0.0826	0.0713	1039	0.2201
Ca	6.151	5710.99	5695.97	14.5003	15.7003	2.0791	37.2054	37.4099	18.5381	123	0.4617
S	6.151	2.3667	0.266	2.15	2.05	0.0003	0.0044	0.0044	0.0027	133	0.018
P	6.151	2.25	0.0907	2.1	2.2	0.0001	0.0022	0.0022	0.0014	153	0.0335
Ba	6.151	18.7012	1.1652	0	16.7009	0.0003	0.0185	0.0186	0.0027	148	0.0451
K	6.151	22.4517	13.8714	0	7.8002	0.0092	0.0962	0.0967	0.0491	112	0.0293
Mn	6.151	7.6502	4.2768	3.8334	0	0.0054	0.1928	0.1938	0.0701	313	0.0746
Fe	6.151	10.8504	5.8343	0	4.4001	0.0033	0.2659	0.2674	0.0951	362	0.0906
Sr	6.151	6.075	1.315	0	4	0.0017	0.0918	0.0923	0.0209	442	0.1308
Ce	6.151	2.425	0.115	0	2.2	0.0002	0.0161	0.0162	0.0023	713	0.1562
Si	6.151	28.5677	24.4607	0	3.7	0.0244	0.6254	0.6288	0.4447	233	0.0833
Al	6.151	10.9502	8.4113	2.6	2.5	0.0278	0.3108	0.3125	0.23	244	0.0915
O							48.2553	48.5206	60.2302
C							12	12	19.9521
Total							99.5188	100	100
Formula	Oxide
MgO	0.5837
Na2O	0.1107
CaO	52.0577
SO3	0.011
P2O5	0.0049
BaO	0.0207
K2O	0.1159
MnO	0.2489
FeO	0.3421
SrO	0.1086
Ce2O3	0.0189
SiO2	1.338
Al2O3	0.5872
CO2	43.9706
Total	99.5188
	23 / 1 . X = 10127.0 Y = 30734.0 Z = 307.0 Comment : SV5_9
Mg	6.1326	8.0501	4.4276	0	3.15	0.0038	0.2958	0.2925	0.2374	650	0.1532
Na	6.1326	0.9333	-0.2453	0	1.1333	-0.0042	0	0	0	1191	0
Ca	6.1326	5324.25	5310.95	15.1003	10.9002	1.9444	34.9397	34.5443	17.0023	116	0.4415
S	6.1326	2.4667	0.4899	2.1	1.85	0.0006	0.0082	0.0082	0.005	128	0.0183
P	6.1326	2.7	0.6557	2.4	1.8	0.0008	0.0159	0.0157	0.01	150	0.0353
Ba	6.1326	18.8845	1.6636	0	16.4009	0.0004	0.0265	0.0262	0.0038	147	0.045
K	6.1326	52.9092	43.779	0	8.3002	0.0292	0.3101	0.3066	0.1547	116	0.0404
Mn	6.1326	6.3751	2.2977	4.6334	0	0.0029	0.104	0.1028	0.0369	345	0.0738
Fe	6.1326	10.0503	4.8823	0	4.5334	0.0028	0.2234	0.2209	0.078	369	0.0894
Sr	6.1326	5.675	0.558	0	4.3	0.0007	0.0392	0.0387	0.0087	460	0.1328
Ce	6.1326	1.775	-0.15	0	1.8333	-0.0003	0	0	0	650	-0.0001
Si	6.1326	91.5109	88.1254	0	3.05	0.088	2.2644	2.2388	1.5725	212	0.1441
Al	6.1326	29.6011	27.1235	2.6	2.4	0.09	0.9981	0.9868	0.7215	240	0.1433
O							49.7819	49.2185	60.6833
C							12	12	19.4858
Total							101.007	100	100
Formula	Oxide
MgO	0.4906
Na2O	0
CaO	48.8877
SO3	0.0206
P2O5	0.0363
BaO	0.0296
K2O	0.3736
MnO	0.1342
FeO	0.2874
SrO	0.0463
Ce2O3	0
SiO2	4.8444
Al2O3	1.886
CO2	43.9706
Total	101.007
	24 / 1 . X = -14252.0 Y = 31765.0 Z = 293.0 Comment : SV5_10
Mg	6.0533	10.7002	8.0551	0	2.3	0.0069	0.5492	0.5492	0.4495	560	0.1673
Na	6.0533	1.2667	-0.0507	0	1.2667	-0.0009	0	0	0	1276	-0.0002
Ca	6.0533	5579.23	5565.04	15.6003	12.3002	2.0641	36.9356	36.9369	18.3327	121	0.4611
S	6.0533	2.5334	0.1319	2.5	2.3	0.0002	0.0022	0.0022	0.0014	144	0.0193
P	6.0533	2.8	1.0443	1.4	2	0.0013	0.0253	0.0253	0.0162	140	0.0347
Ba	6.0533	17.7844	-0.1366	0	17.0676	0	0	0	0	152	-0.0002
K	6.0533	20.5014	12.2512	0	7.5002	0.0083	0.0866	0.0866	0.0441	112	0.0289
Mn	6.0533	13.2256	9.7935	3.9001	0	0.0125	0.4483	0.4483	0.1623	319	0.0918
Fe	6.0533	8.6252	4.1032	0	3.9667	0.0023	0.1899	0.1899	0.0677	349	0.0841
Sr	6.0533	8.5501	3.8496	0	3.95	0.005	0.2732	0.2732	0.062	447	0.1427
Ce	6.0533	2.075	-0.235	0	2.2	-0.0005	0	0	0	724	0
Si	6.0533	33.8348	28.8398	0	4.5	0.0292	0.7492	0.7493	0.5307	261	0.0924
Al	6.0533	10.3001	7.3016	4.1	2.3	0.0246	0.2742	0.2742	0.2022	267	0.0923
O							48.463	48.4647	60.256
C							12	12	19.8752
Total							99.9968	100	100
Formula	Oxide
MgO	0.9108
Na2O	0
CaO	51.6802
SO3	0.0056
P2O5	0.058
BaO	0
K2O	0.1043
MnO	0.5789
FeO	0.2443
SrO	0.3231
Ce2O3	0
SiO2	1.6029
Al2O3	0.5181
CO2	43.9706
Total	99.9968
	25 / 1 . X = -13878.0 Y = 31321.0 Z = 293.0 Comment : SV5_11
Mg	6.0899	11.8002	9.6727	0	1.85	0.0083	0.6567	0.6597	0.5403	500	0.1702
Na	6.0899	0.8	-0.1707	0	0.9333	-0.0029	0	0	0	1089	-0.0001
Ca	6.0899	5637.82	5623.35	15.8003	12.7002	2.0732	37.0714	37.2425	18.4958	122	0.4615
S	6.0899	2.3334	0.6058	1.9	1.55	0.0007	0.0101	0.0102	0.0063	121	0.0175
P	6.0899	2.65	0.7721	1.7	2	0.001	0.0185	0.0186	0.012	143	0.0343
Ba	6.0899	18.9679	0.0667	0	18.0011	0	0.0011	0.0011	0.0002	155	0.0468
K	6.0899	14.7007	6.7805	0	7.2002	0.0046	0.0475	0.0477	0.0243	109	0.026
Mn	6.0899	17.226	13.9406	3.7334	0	0.0177	0.6341	0.6371	0.2308	311	0.1007
Fe	6.0899	9.4753	3.3572	0	5.3668	0.0019	0.1544	0.1551	0.0553	404	0.0916
Sr	6.0899	7.8251	3.8386	0	3.35	0.0049	0.271	0.2722	0.0618	408	0.1332
Ce	6.0899	2.125	-0.045	0	2.0667	-0.0001	0	0	0	699	-0.0002
Si	6.0899	17.8338	14.3372	0	3.15	0.0144	0.3706	0.3723	0.2639	216	0.0683
Al	6.0899	8.1001	5.7837	2.5	2.2	0.0193	0.2164	0.2174	0.1604	236	0.0813
O							48.1439	48.3661	60.1705
C							12	12	19.9785
Total							99.5957	100	100
Formula	Oxide
MgO	1.0889
Na2O	0
CaO	51.8703
SO3	0.0253
P2O5	0.0425
BaO	0.0012
K2O	0.0572
MnO	0.8188
FeO	0.1986
SrO	0.3205
Ce2O3	0
SiO2	0.7928
Al2O3	0.4089
CO2	43.9706
Total	99.5957
	26 / 1 . X = -13786.0 Y = 31104.0 Z = 293.0 Comment : SV5_12
Mg	6.0899	9.7501	7.1051	0	2.3	0.0061	0.4821	0.4872	0.3981	556	0.1604
Na	6.0899	0.8667	-0.3813	0	1.2	-0.0065	0	0	0	1235	0
Ca	6.0899	5595.61	5581.45	15.7003	12.1002	2.0578	36.8261	37.217	18.4409	121	0.4593
S	6.0899	2.4334	-0.276	3.35	2.05	-0.0003	0	0	0	152	0
P	6.0899	2.55	1.4314	1	1.2	0.0018	0.0344	0.0348	0.0223	112	0.0309
Ba	6.0899	18.9845	0.1884	0	17.9011	0	0.003	0.0031	0.0004	155	0.0467
K	6.0899	18.0511	9.4709	0	7.8002	0.0064	0.0664	0.0671	0.0341	113	0.0279
Mn	6.0899	13.7506	9.8786	4.4001	0	0.0126	0.4495	0.4543	0.1642	338	0.0941
Fe	6.0899	8.5252	3.3572	0	4.5334	0.0019	0.1545	0.1561	0.0555	371	0.0857
Sr	6.0899	8.8751	4.5911	0	3.6	0.0059	0.3239	0.3273	0.0742	423	0.1398
Ce	6.0899	1.875	-0.12	0	1.9	-0.0002	0	0	0	666	-0.0001
Si	6.0899	21.3339	17.0049	0	3.9	0.0171	0.4391	0.4438	0.3138	241	0.075
Al	6.0899	10.1001	7.2956	3.6	2.3	0.0244	0.2724	0.2753	0.2026	261	0.0904
O							48.0242	48.5341	60.2418
C							12	12	20.052
Total							99.0756	100	100
Formula	Oxide
MgO	0.7995
Na2O	0
CaO	51.527
SO3	0
P2O5	0.0788
BaO	0.0034
K2O	0.08
MnO	0.5804
FeO	0.1987
SrO	0.383
Ce2O3	0
SiO2	0.9395
Al2O3	0.5147
CO2	43.9706
Total	99.0757
	27 / 1 . X = -13213.0 Y = 31218.0 Z = 293.0 Comment : SV5_13
Mg	6.1235	9.1501	6.3901	0	2.4	0.0054	0.432	0.4354	0.3558	569	0.1567
Na	6.1235	1.3333	0.432	0	0.8667	0.0073	0.0826	0.0832	0.0719	1043	0.2215
Ca	6.1235	5673.39	5658.63	15.1003	14.3003	2.0748	37.1094	37.3957	18.5324	123	0.4612
S	6.1235	2.9334	1.3037	1.95	1.3	0.0015	0.0217	0.0219	0.0135	116	0.0186
P	6.1235	2.55	1.3129	1	1.4	0.0016	0.0313	0.0315	0.0202	116	0.0311
Ba	6.1235	19.1012	0.3401	0	17.8677	0.0001	0.0054	0.0055	0.0008	154	0.0465
K	6.1235	19.4012	11.3711	0	7.3002	0.0076	0.0791	0.0797	0.0405	109	0.0278
Mn	6.1235	16.2509	12.8188	3.9001	0	0.0162	0.5802	0.5847	0.2114	316	0.0983
Fe	6.1235	7.2502	2.2721	0	4.3667	0.0013	0.104	0.1048	0.0373	362	0.0809
Sr	6.1235	7.2001	0.893	0	5.3	0.0011	0.0627	0.0632	0.0143	512	0.1482
Ce	6.1235	2.3	-0.36	0	2.5333	-0.0007	0	0	0	766	0
Si	6.1235	20.1339	16.1933	0	3.55	0.0162	0.4161	0.4194	0.2966	229	0.0722
Al	6.1235	10.5001	7.5449	3.2	2.8	0.0251	0.2804	0.2826	0.208	264	0.0919
O							48.1213	48.4926	60.1997
C							12	12	19.9976
Total							99.3263	100	100
Formula	Oxide
MgO	0.7164
Na2O	0.1113
CaO	51.9234
SO3	0.0542
P2O5	0.0717
BaO	0.0061
K2O	0.0953
MnO	0.7492
FeO	0.1338
SrO	0.0741
Ce2O3	0
SiO2	0.8903
Al2O3	0.5298
CO2	43.9706
Total	99.3263
	28 / 1 . X = -15379.0 Y = 30774.0 Z = 285.0 Comment : SV5_14
Mg	6.1647	10.2001	6.9801	0	2.8	0.0059	0.4688	0.4731	0.3868	610	0.1652
Na	6.1647	1.7333	0.6933	0	1	0.0117	0.1316	0.1328	0.1148	1113	0.2449
Ca	6.1647	5657.81	5643.84	14.7003	13.0002	2.0555	36.7693	37.1113	18.3998	118	0.4573
S	6.1647	2.8	0.7261	2	2.15	0.0009	0.012	0.0121	0.0075	131	0.0189
P	6.1647	2.8	1.3221	1.3	1.6	0.0016	0.0314	0.0317	0.0203	125	0.0329
Ba	6.1647	18.3344	-0.3567	0	17.8011	-0.0001	0	0	0	152	-0.0001
K	6.1647	15.3508	8.0906	0	6.6001	0.0054	0.056	0.0566	0.0287	103	0.0254
Mn	6.1647	18.2511	14.0857	4.7334	0	0.0177	0.633	0.6389	0.2311	346	0.1044
Fe	6.1647	8.0752	3.2871	0	4.2001	0.0018	0.1494	0.1507	0.0536	352	0.082
Sr	6.1647	8.5251	4.0031	0	3.8	0.0051	0.2792	0.2818	0.0639	430	0.1387
Ce	6.1647	2	-0.345	0	2.2333	-0.0007	0	0	0	716	0
Si	6.1647	17.4671	13.5266	0	3.55	0.0134	0.3454	0.3487	0.2467	227	0.0679
Al	6.1647	11.0502	8.1397	3.4	2.6	0.0269	0.3006	0.3034	0.2235	262	0.093
O							48.0123	48.4589	60.1851
C							12	12	20.0381
Total							99.189	100	100
Formula	Oxide
MgO	0.7774
Na2O	0.1774
CaO	51.4476
SO3	0.03
P2O5	0.0719
BaO	0
K2O	0.0675
MnO	0.8173
FeO	0.1921
SrO	0.3302
Ce2O3	0
SiO2	0.739
Al2O3	0.568
CO2	43.9706
Total	99.189
	29 / 1 . X = -16245.0 Y = 30903.0 Z = 285.0 Comment : SV5_15
Mg	6.125	10.4501	7.0001	0	3	0.0059	0.4733	0.4831	0.3942	637	0.1693
Na	6.125	0.6	-1.2027	0	1.7333	-0.0204	0	0	0	1503	0
Ca	6.125	5636.55	5621.36	16.3003	13.7002	2.0606	36.8679	37.6335	18.622	124	0.459
S	6.125	2.4667	0.4109	2.45	1.65	0.0005	0.0068	0.007	0.0043	132	0.0182
P	6.125	2.6	0.785	1.4	2.1	0.001	0.0187	0.0191	0.0122	142	0.0336
Ba	6.125	17.9011	-0.44	0	17.4677	-0.0001	0	0	0	152	-0.0001
K	6.125	14.5007	6.0305	0	7.7002	0.004	0.0419	0.0428	0.0217	112	0.0261
Mn	6.125	16.0509	12.2081	4.3667	0	0.0154	0.5524	0.5638	0.2035	335	0.0991
Fe	6.125	7.6252	2.2671	0	4.7001	0.0013	0.1037	0.1059	0.0376	375	0.0834
Sr	6.125	8.3501	3.9471	0	3.7	0.005	0.2767	0.2824	0.0639	428	0.1378
Ce	6.125	1.975	-0.44	0	2.3	-0.0008	0	0	0	731	0
Si	6.125	12.7002	7.0392	0	5.1	0.007	0.1806	0.1844	0.1302	275	0.0648
Al	6.125	5.85	2.8172	3.4	2.8	0.0094	0.1047	0.1069	0.0786	268	0.0744
O							47.5829	48.571	60.2058
C							12	12	20.2259
Total							98.2097	100	100
Formula	Oxide
MgO	0.7849
Na2O	0
CaO	51.5856
SO3	0.0171
P2O5	0.0429
BaO	0
K2O	0.0505
MnO	0.7132
FeO	0.1334
SrO	0.3272
Ce2O3	0
SiO2	0.3865
Al2O3	0.1979
CO2	43.9706
Total	98.2097
	30 / 1 . X = -16140.0 Y = 30359.0 Z = 285.0 Comment : SV5_16
Mg	6.1403	9.9001	6.6801	0	2.8	0.0057	0.4501	0.453	0.3713	612	0.1639
Na	6.1403	1.0667	0.1653	0	0.8667	0.0028	0.0315	0.0317	0.0275	1041	0.2072
Ca	6.1403	5722.1	5707.11	17.3004	11.9002	2.0868	37.3076	37.5481	18.6633	123	0.4627
S	6.1403	2.1667	-0.3173	3.1	1.85	-0.0004	0	0	0	144	0
P	6.1403	3.3	1.8221	1.3	1.6	0.0023	0.0434	0.0436	0.0281	125	0.0349
Ba	6.1403	18.3011	-0.04	0	17.4677	0	0	0	0	152	-0.0007
K	6.1403	15.6008	7.4606	0	7.4002	0.005	0.0518	0.0521	0.0266	110	0.0263
Mn	6.1403	16.5259	12.6245	4.4334	0	0.0159	0.5695	0.5732	0.2079	337	0.1001
Fe	6.1403	7.4252	3.1311	0	3.7667	0.0018	0.1428	0.1437	0.0513	335	0.0785
Sr	6.1403	8.4751	4.9646	0	2.95	0.0063	0.3472	0.3494	0.0794	380	0.1307
Ce	6.1403	1.775	-0.64	0	2.3	-0.0012	0	0	0	729	0
Si	6.1403	14.4003	11.0703	0	3	0.011	0.2834	0.2852	0.2023	210	0.062
Al	6.1403	7.5001	5.406	2.4	1.9	0.0179	0.2003	0.2016	0.1488	218	0.0772
O							48.0089	48.3183	60.1618
C							12	12	20.0318
Total							99.4364	100	100
Formula	Oxide
MgO	0.7464
Na2O	0.0425
CaO	52.2008
SO3	0
P2O5	0.0993
BaO	0
K2O	0.0624
MnO	0.7354
FeO	0.1837
SrO	0.4105
Ce2O3	0
SiO2	0.6063
Al2O3	0.3784
CO2	43.9706
Total	99.4364
	31 / 1 . X = -528.0 Y = 20813.0 Z = 270.0 Comment : SV5_17
Mg	6.1067	7.7001	4.7676	0	2.55	0.0041	0.3224	0.3238	0.2644	586	0.148
Na	6.1067	0.5333	-0.576	0	1.0667	-0.0098	0	0	0	1161	0
Ca	6.1067	5571.16	5556.76	15.6003	12.8002	2.043	36.5719	36.7279	18.1898	122	0.4567
S	6.1067	3.2	0.9754	2.2	2.25	0.0012	0.0163	0.0164	0.0101	137	0.0202
P	6.1067	2.95	1.5093	1.5	1.4	0.0019	0.0362	0.0364	0.0233	126	0.0337
Ba	6.1067	18.6011	-0.615	0	18.3011	-0.0001	0	0	0	156	0
K	6.1067	28.6027	22.0026	0	6.0001	0.0148	0.1542	0.1549	0.0786	100	0.0305
Mn	6.1067	15.2758	11.4037	4.4001	0	0.0145	0.5175	0.5197	0.1878	337	0.0976
Fe	6.1067	9.0753	4.0592	0	4.4001	0.0023	0.1863	0.1871	0.0665	364	0.0864
Sr	6.1067	6.7751	2.015	0	4	0.0026	0.142	0.1426	0.0323	446	0.135
Ce	6.1067	2.15	-0.3	0	2.3333	-0.0006	0	0	0	738	0
Si	6.1067	26.8009	22.7494	0	3.65	0.0228	0.5872	0.5897	0.4168	234	0.0817
Al	6.1067	21.2006	18.6289	3	2.3	0.0621	0.6923	0.6952	0.5115	246	0.1235
O							48.3998	48.6064	60.3024
C							12	12	19.9164
Total							99.6261	100	100
Formula	Oxide
MgO	0.5346
Na2O	0
CaO	51.1714
SO3	0.0408
P2O5	0.083
BaO	0
K2O	0.1858
MnO	0.6682
FeO	0.2396
SrO	0.168
Ce2O3	0
SiO2	1.2562
Al2O3	1.3081
CO2	43.9706
Total	99.6261
	32 / 1 . X = -518.0 Y = 20843.0 Z = 270.0 Comment : SV5_18
Mg	6.1128	10.0001	6.8376	0	2.75	0.0058	0.4625	0.4637	0.3794	610	0.1648
Na	6.1128	1.4667	0.2187	0	1.2	0.0037	0.0418	0.0419	0.0363	1230	0.2442
Ca	6.1128	5595.56	5582.19	14.4003	12.0002	2.0503	36.6766	36.7669	18.245	117	0.4574
S	6.1128	2.1333	0.3812	1.9	1.6	0.0005	0.0064	0.0064	0.004	122	0.017
P	6.1128	3.15	1.6907	1.4	1.5	0.0021	0.0405	0.0406	0.0261	126	0.0345
Ba	6.1128	17.9011	-0.825	0	17.8344	-0.0002	0	0	0	154	0
K	6.1128	21.9016	14.2014	0	7.0002	0.0095	0.0994	0.0996	0.0507	107	0.0287
Mn	6.1128	20.7014	17.1227	4.0667	0	0.0217	0.7759	0.7778	0.2816	324	0.109
Fe	6.1128	7.7252	2.8611	0	4.2667	0.0016	0.1311	0.1314	0.0468	358	0.0819
Sr	6.1128	7.5501	3.0281	0	3.8	0.0039	0.213	0.2135	0.0485	433	0.1359
Ce	6.1128	1.65	-0.345	0	1.9	-0.0007	0	0	0	663	0
Si	6.1128	28.8011	24.8051	0	3.6	0.0249	0.6387	0.6403	0.4534	231	0.084
Al	6.1128	12.5002	9.3106	2.7	3.5	0.031	0.3464	0.3473	0.256	273	0.0995
O							48.3514	48.4705	60.2524
C							12	12	19.9198
Total							99.7838	100	100
Formula	Oxide
MgO	0.767
Na2O	0.0564
CaO	51.3179
SO3	0.0159
P2O5	0.0928
BaO	0
K2O	0.1197
MnO	1.0019
FeO	0.1687
SrO	0.2519
Ce2O3	0
SiO2	1.3664
Al2O3	0.6546
CO2	43.9706
Total	99.7838
	33 / 1 . X = -622.0 Y = 20883.0 Z = 270.0 Comment : SV5_19
Mg	6.0594	7.6001	5.1276	0	2.15	0.0044	0.3509	0.3526	0.2896	543	0.1458
Na	6.0594	1.3333	0.2933	0	1	0.005	0.0568	0.0571	0.0496	1133	0.2312
Ca	6.0594	5793.81	5780	16.3003	10.5001	2.1417	38.239	38.4262	19.1407	120	0.4726
S	6.0594	2.4667	0.5588	2.45	1.35	0.0007	0.0094	0.0094	0.0059	128	0.0181
P	6.0594	2.6	1.0221	1.4	1.7	0.0013	0.0245	0.0247	0.0159	131	0.0329
Ba	6.0594	18.4845	0.1434	0	17.4677	0	0.0023	0.0023	0.0003	154	0.0464
K	6.0594	14.0007	6.5205	0	6.8002	0.0044	0.0456	0.0458	0.0234	106	0.0252
Mn	6.0594	18.1261	14.6354	3.9667	0	0.0187	0.6692	0.6725	0.2444	322	0.1039
Fe	6.0594	6.0751	0.261	0	5.1001	0.0001	0.0121	0.0121	0.0043	396	0.0815
Sr	6.0594	6.6751	1.915	0	4	0.0025	0.1356	0.1362	0.031	449	0.1351
Ce	6.0594	1.725	-0.27	0	1.9	-0.0005	0	0	0	669	0
Si	6.0594	6	2.1705	0	3.45	0.0022	0.0562	0.0565	0.0402	228	0.0487
Al	6.0594	4.15	1.9843	2.9	1.7	0.0067	0.0745	0.0749	0.0554	227	0.0634
O							47.8952	48.1296	60.0554
C							12	12	20.0438
Total							99.5713	100	100
Formula	Oxide
MgO	0.5819
Na2O	0.0766
CaO	53.504
SO3	0.0234
P2O5	0.0562
BaO	0.0026
K2O	0.0549
MnO	0.8641
FeO	0.0155
SrO	0.1603
Ce2O3	0
SiO2	0.1203
Al2O3	0.1408
CO2	43.9706
Total	99.5713

## Sheet: Operating conditions
FileName : 2024-09-03_carbonates.qtiDat
Signal(s) Used : Mg Ka, Na Ka, Ca Ka, S Ka, P Ka, Ba La, K Ka, Mn Ka, Fe Ka, Sr La, Ce La, Si Ka, Al Ka
Spectrometers Conditions : Sp4 TAP, Sp4 TAP, Sp2 LPET, Sp5 LPET, Sp2 LPET, Sp2 LPET, Sp2 LPET, Sp3 LLIF, Sp3 LLIF, Sp4 TAP, Sp3 LLIF, Sp4 TAP, Sp4 TAP
Full Spectrometers Conditions : Sp4 TAP(2d= 25.745,K= 0.00218), Sp4 TAP(2d= 25.745,K= 0.00218), Sp2 LPET(2d= 8.75,K= 0.000144), Sp5 LPET(2d= 8.75,K= 0.000144), Sp2 LPET(2d= 8.75,K= 0.000144), Sp2 LPET(2d= 8.75,K= 0.000144), Sp2 LPET(2d= 8.75,K= 0.000144), Sp3 LLIF(2d= 4.0267,K= 5.8E-05), Sp3 LLIF(2d= 4.0267,K= 5.8E-05), Sp4 TAP(2d= 25.745,K= 0.00218), Sp3 LLIF(2d= 4.0267,K= 5.8E-05), Sp4 TAP(2d= …
Column Conditions : Cond 1 : 15 keV 10 nA
Date : Sep-20-2024
User Name : SX942-PC\SX
Setup Name : D:\SXPC\Analysis Setups\Quanti\Ca_carbonate-III.qtiSet
DataSet Comment : SPHYSE (PLU-7 & SV-5)
Comment :
Analysis Date : Tuesday, September 03, 2024 10:45:41 AM
Project Name : SPHYSE
Sample Name : SV-5
Analysis Parameters :
Sp Elements Xtal Position Bg1 Bg2 Slope Bias Gain Dtime Blin Wind Mode
Sp4 Mg Ka TAP 38503 1125 1.15 1308 3057 1 560 Inte
Sp4 Na Ka TAP 46352 538 1.04 1300 2977 1 560 Inte
Sp2 Ca Ka LPET 38386 -900 1200 1830 927 1 560 Inte
Sp5 S Ka LPET 61390 -1720 1770 1840 966 3 560 Inte
Sp2 P Ka LPET 70381 -2330 1600 1832 933 1 560 Inte
Sp2 Ba La LPET 31722 500 1.05 1831 940 3 560 Inte
Sp2 K Ka LPET 42762 600 1.1 1830 923 3 560 Inte
Sp3 Mn Ka LLIF 52172 -1915 0.88 1845 450 3 560 Inte
Sp3 Fe Ka LLIF 48080 1900 1.14 1844 453 3 560 Inte
Sp4 Sr La TAP 26726 1760 1.19 1302 3056 1 560 Inte
Sp3 Ce La LLIF 63456 1065 1.05 1820 1000 1 560 Inte
Sp4 Si Ka TAP 27736 1100 1.11 1305 3057 1 560 Inte
Sp4 Al Ka TAP 32467 -2050 1300 1304 3016 1 560 Inte
Peak Position : Sp4 38503 (1125, Slope = 1.15), Sp4 46352 (538, Slope = 1.04), Sp2 38386 (-900, 1200), Sp5 61390 (-1720, 1770), Sp2 70381 (-2330, 1600), Sp2 31722 (500, Slope = 1.05), Sp2 42762 (600, Slope = 1.1), Sp3 52172 (-1915, Slope = 0.88), Sp3 48080 (1900, Slope = 1.14), Sp4 26726 (1760, Slope = 1.19), Sp3 63456 (1065, Slope = 1.05), Sp4 27736 (1100, Slope = 1.11), Sp4 32467 (-2050, 1300)
Current Sample Position : X = -2219 Y = -26036 Z = 176 BeamX = 0.00 BeamX = 0.00
Standard Name :
Mg On MgO-coated
Na On Albite-coated
Ca ,Si On Diopside-coated
S ,Sr On SrSO4-coated
P On Ca5P3O12Cl
Ba On BaSO4
K On Orthoclase
Mn On Rodonite
Fe On Fe2O3-coated
Ce On CePO4
Al On Orthoclase-coated
Standard composition :
MgO-coated = Mg : 60.30 %, O : 39.70 %
Albite-coated = O : 48.84 %, Na : 8.53 %, Al : 10.06 %, Si : 32.44 %, K : 0.08 %, Ca : 0.07 %
Diopside-coated = O : 44.25 %, Na : 0.05 %, Mg : 10.84 %, Al : 0.03 %, Si : 25.88 %, Ca : 18.38 %, Ti : 0.03 %, Cr : 0.01 %, Mn : 0.07 %, Fe : 0.70 %
SrSO4-coated = O : 34.85 %, S : 17.45 %, Sr : 47.70 %
Ca5P3O12Cl = Ca : 38.48 %, P : 17.84 %, O : 36.87 %, Cl : 6.81 %
BaSO4 = Ba : 58.84 %, S : 13.74 %, O : 27.42 %
Orthoclase = Na : 1.01 %, Al : 9.81 %, Si : 30.40 %, K : 12.18 %, Ba : 0.13 %, O : 46.47 %
Rodonite = O : 37.88 %, Mg : 1.12 %, Si : 22.17 %, Ca : 5.11 %, Mn : 32.93 %, Fe : 0.79 %
Fe2O3-coated = O : 30.06 %, Fe : 69.94 %
CePO4 = Ce : 59.60 %, P : 13.18 %, O : 27.22 %
Orthoclase-coated = O : 46.28 %, Na : 1.01 %, Mg : 0.00 %, Al : 9.82 %, Si : 30.43 %, K : 12.19 %, Ca : 0.01 %, Ti : 0.01 %, Fe : 0.02 %, Sr : 0.04 %, Ba : 0.13 %
Calibration file name (Element intensity cps/nA) :
Mg : Geology\MgO-coated_15kV_MgKa-Sp4-TAP_011.calDat (Mg : 192.5 cps/nA)
Na : Geology\Albite-coated_15kV_NaKa-Sp4-TAP_011.calDat (Na : 9.6 cps/nA)
Ca : Geology\Diopside-coated_15kV_SiKa-Sp4-TAP_CaKa-Sp2-LPET_CaKa-Sp5-LPET_004.calDat (Ca : 445.4 cps/nA)
S : Geology\SrSO4-coated_15kV_SKa-Sp2-LPET_SKa-Sp5-LPET_001.calDat (S : 138.5 cps/nA)
P : Geology\Ca5P3O12Cl_15kV_PKa-Sp2-LPET_001.calDat (P : 130.2 cps/nA)
Ba : Geology\BaSO4_15kV_BaLa-Sp2-LPET_BaLa-Sp3-LLIF_BaLa-Sp5-LPET_001.calDat (Ba : 741.5 cps/nA)
K : Geology\Orthoclase_15kV_AlKa-Sp4-TAP_SiKa-Sp5-LPET_KKa-Sp2-LPET_003.calDat (K : 244.3 cps/nA)
Mn : Geology\Rodonite_15kV_MnKa-Sp3-LLIF_001.calDat (Mn : 129.1 cps/nA)
Fe : Geology\Fe2O3-coated_15kV_FeKa-Sp3-LLIF_005.calDat (Fe : 288.7 cps/nA)
Sr : Geology\SrSO4-coated_15kV_SrLa-Sp4-TAP_SrLa-Sp5-LPET_001.calDat (Sr : 128.1 cps/nA)
Ce : Geology\CePO4_15kV_CeLa-Sp3-LLIF_002.calDat (Ce : 84.7 cps/nA)
Si : Geology\Diopside-coated_15kV_SiKa-Sp4-TAP_006.calDat (Si : 163.2 cps/nA)
Al : Geology\Orthoclase-coated_15kV_AlKa-Sp4-TAP_006.calDat (Al : 49.1 cps/nA)
Beam Size : 7 µm
Beam curr (nA)
	Mg	Na	Ca	S	P	Ba	K	Mn	Fe	Sr	Ce	Si	Al	O	C	X	Y	Z	Comment	Point#
15 / 1 .	6.1586	6.1586	6.1586	6.1586	6.1586	6.1586	6.1586	6.1586	6.1586	6.1586	6.1586	6.1586	6.1586			-5127	31742	304	SV5_1	15
16 / 1 .	6.0258	6.0258	6.0258	6.0258	6.0258	6.0258	6.0258	6.0258	6.0258	6.0258	6.0258	6.0258	6.0258			-5188	31699	304	SV5_2	16
17 / 1 .	6.122	6.122	6.122	6.122	6.122	6.122	6.122	6.122	6.122	6.122	6.122	6.122	6.122			-4677	31765	304	SV5_3	17
18 / 1 .	6.1571	6.1571	6.1571	6.1571	6.1571	6.1571	6.1571	6.1571	6.1571	6.1571	6.1571	6.1571	6.1571			2269	32808	315	SV5_4	18
19 / 1 .	6.0457	6.0457	6.0457	6.0457	6.0457	6.0457	6.0457	6.0457	6.0457	6.0457	6.0457	6.0457	6.0457			2295	32750	315	SV5_5	19
20 / 1 .	6.1204	6.1204	6.1204	6.1204	6.1204	6.1204	6.1204	6.1204	6.1204	6.1204	6.1204	6.1204	6.1204			2119	32747	315	SV5_6	20
21 / 1 .	6.1265	6.1265	6.1265	6.1265	6.1265	6.1265	6.1265	6.1265	6.1265	6.1265	6.1265	6.1265	6.1265			10983	30270	307	SV5_7	21
22 / 1 .	6.151	6.151	6.151	6.151	6.151	6.151	6.151	6.151	6.151	6.151	6.151	6.151	6.151			10345	29851	307	SV5_8	22
23 / 1 .	6.1326	6.1326	6.1326	6.1326	6.1326	6.1326	6.1326	6.1326	6.1326	6.1326	6.1326	6.1326	6.1326			10127	30734	307	SV5_9	23
24 / 1 .	6.0533	6.0533	6.0533	6.0533	6.0533	6.0533	6.0533	6.0533	6.0533	6.0533	6.0533	6.0533	6.0533			-14252	31765	293	SV5_10	24
25 / 1 .	6.0899	6.0899	6.0899	6.0899	6.0899	6.0899	6.0899	6.0899	6.0899	6.0899	6.0899	6.0899	6.0899			-13878	31321	293	SV5_11	25
26 / 1 .	6.0899	6.0899	6.0899	6.0899	6.0899	6.0899	6.0899	6.0899	6.0899	6.0899	6.0899	6.0899	6.0899			-13786	31104	293	SV5_12	26
27 / 1 .	6.1235	6.1235	6.1235	6.1235	6.1235	6.1235	6.1235	6.1235	6.1235	6.1235	6.1235	6.1235	6.1235			-13213	31218	293	SV5_13	27
28 / 1 .	6.1647	6.1647	6.1647	6.1647	6.1647	6.1647	6.1647	6.1647	6.1647	6.1647	6.1647	6.1647	6.1647			-15379	30774	285	SV5_14	28
29 / 1 .	6.125	6.125	6.125	6.125	6.125	6.125	6.125	6.125	6.125	6.125	6.125	6.125	6.125			-16245	30903	285	SV5_15	29
30 / 1 .	6.1403	6.1403	6.1403	6.1403	6.1403	6.1403	6.1403	6.1403	6.1403	6.1403	6.1403	6.1403	6.1403			-16140	30359	285	SV5_16	30
31 / 1 .	6.1067	6.1067	6.1067	6.1067	6.1067	6.1067	6.1067	6.1067	6.1067	6.1067	6.1067	6.1067	6.1067			-528	20813	270	SV5_17	31
32 / 1 .	6.1128	6.1128	6.1128	6.1128	6.1128	6.1128	6.1128	6.1128	6.1128	6.1128	6.1128	6.1128	6.1128			-518	20843	270	SV5_18	32
33 / 1 .	6.0594	6.0594	6.0594	6.0594	6.0594	6.0594	6.0594	6.0594	6.0594	6.0594	6.0594	6.0594	6.0594			-622	20883	270	SV5_19	33
