# Supplementary material
Source: Research Square preprint supplement (doi:10.21203/rs.3.rs-9200516/v1)
Supplement: Supplementary file 1 [file cf4e0aac9ba9e88815155270.docx]

Supplementary information of

**Distinctive microfabrics and radiometric age of seep carbonates from the Romagna Apennines (San Vernicio, Italy): Insights into seepage dynamics**

*by Stefano* ***Giunti****, Fabian* ***Tramm****, Stefano* ***Conti****, Catherine* ***Mottram****, Glenn* ***Chapman****,* *Magdalena* ***Radzikowska****, Daniela* ***Fontana****, and Maciej J.* ***Bojanowski***

**U-PB GEOCHRONOLOGY METHODS**

**LA-ICP-MS operating conditions**

| **Laboratory & Sample Preparation** |  |
| --- | --- |
| Laboratory name | Institute of the Earth and Environment, University of Portsmouth |
| Analytical sessions | 25/04/25_run2 |
| Sample type/mineral | Carbonate |
| Sample preparation | *In-situ* polished 30 µm thin sections |
| Imaging | Reflected light |
| **Laser ablation system** |  |
| Make, Model & type | ASI RESOlution SE ArF (Argon-Fluoride) |
| Ablation cell & volume | Laurin S155 (dual volume design) |
| Laser wavelength (nm) | 193nm |
| Pulse width (ns) | 3 ns |
| Fluence (J cm-2) | ≈ 3.5 J cm-2 |
| Repetition rate (Hz) | 8 Hz |
| Spot size (um) | 80 µm following 100 µm pre-ablation of 3 pulses |
| Sampling mode / pattern | Spot, with pre-ablation cleaning spot |
| Carrier gas | 100% He (0.30 l min-1), Ar make-up gas (1.05-1.06 l min-1) combined 50% along sample line in mixing bulb |
| Ablation duration (secs) | 20 secs, 15 s washout, 20 s background between pulses |
| Cell carrier gas flow (l/min) | 100% He (0.300 l min-1), N2 (0.0032l min-1) |
| **ICP-MS Instrument** |  |
| Make, Model & type | Agilent 8900 Triple Quad ICP-QQQ-MS |
| Carrier gas flow rate | 0.30 l min-1 He and 1.05-1.06 l min-1 Ar neb flow |
| Auxiliary gas flow rate | 0.9 l min-1 Ar |
| RF power (W) | 1330 W, 15 l min-1 Ar plasma flow |
| Detection system | 3 MHz quadrupole |
| Masses measured | The following masses were measured and had integration time of (10 ms 202Hg, 204Pb),(20 ms 232Th, 235U, 238U, 208Pb), (50 ms 206Pb), and (70 ms 207Pb). |
| Integration time per peak (ms) | 10-70 ms |
| Attenuation | Pulse/analogue factors were calibrated for U and Th using NIST 612 glass. |
| Mass spectrometer tuning parameters | A 38um, 10 Hz, ~4.5 J cm-2 line on NIST-612 glass yields a typical sensitivity of ~970 000 cps U238 and a Hg202 background of 700 cps. |
| Fractionation and oxide production | U/Th fractionation was typically ~4-6% and Th oxide production is 0.2-0.3% |
| **Data Processing** |  |
| Gas blank | 20 second on-peak zero subtracted |
| Calibration strategy | Primary and secondary reference materials were ablated between every 8 unknowns |
| Reference Material info | SRM-614 glass (NIST-614; 0.82 ppb U and 2.3 ppb Pb; GEOREM; 238U/206Pb ratio of 0.2236; 207Pb/206Pb 0.8704 and 206Pb/208Pb 2.0995 - GEOREM) and WC-1 carbonate (254.4 ± 6.4 Ma; Roberts *et al.*, 2017), Duff Brown Limestone (64 ± 2 Ma; Hill *et al.*, 2016), and RA138 (321.99 ± 0.65 Ma; Guillong *et al.*, 2024) were used as a secondary reference material to test long-term reproducibility. |
| Secondary Reference material reproducibility | Analyses of Duff Brown during the analytical period yielded a 206Pb/238U intercept age of 62 ± 1.1 Ma (MSWD = 0.5; 3% from reported age). Analyses of RA-138 during the analytical period yielded a 206Pb/238U intercept age of 312.0 ± 6.4 Ma (MSWD = 0.8; 1.0% from reported age). |
| Data processing package used / Correction for LIEF | Iolite© 3.4 software, using the 'automatic spline' to correct for downhole fractionation (which was minimal) and the 'Automatic spline' to correct for instrumental drift |
| Common-Pb correction, composition and uncertainty | **Propagated analytical uncertainties:** analytical uncertainties, reproducibility of the primary reference material in each analytical session and the uncertainty on the primary RM have been added in quadrature to all data presented in data tables and in plots. Final quoted uncertainties include an additional 3% uncertainty added in quadrature to account for typical long-term reproducibility of analytical equipment and for the secondary reference material. |

| **Analytical session** | **Uncorrected WC-1 age (Ma)** | **Correction factor** |
| --- | --- | --- |
| 25/04/2025_run2 | 276.2 ± 2.2 | 1.087 |


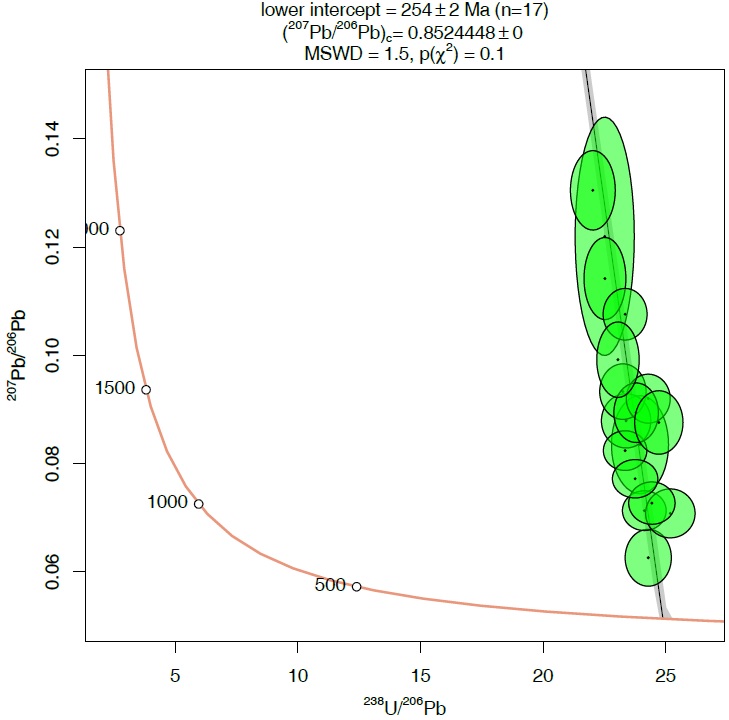


**Fig. SI 1.** WC-1 primary reference material:

**Fig. SI 2.** Duff Brown (left) and RA-138 (right) secondary reference material (TW diagrams):


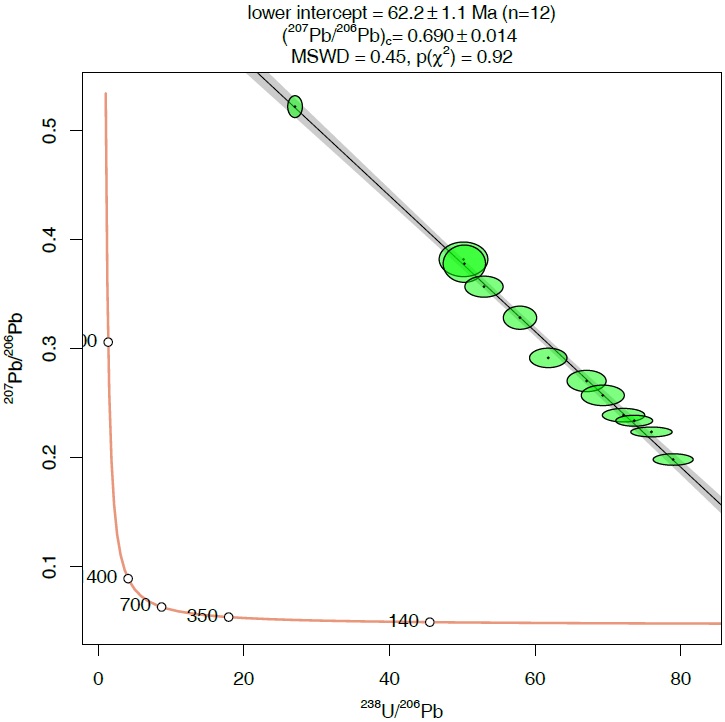

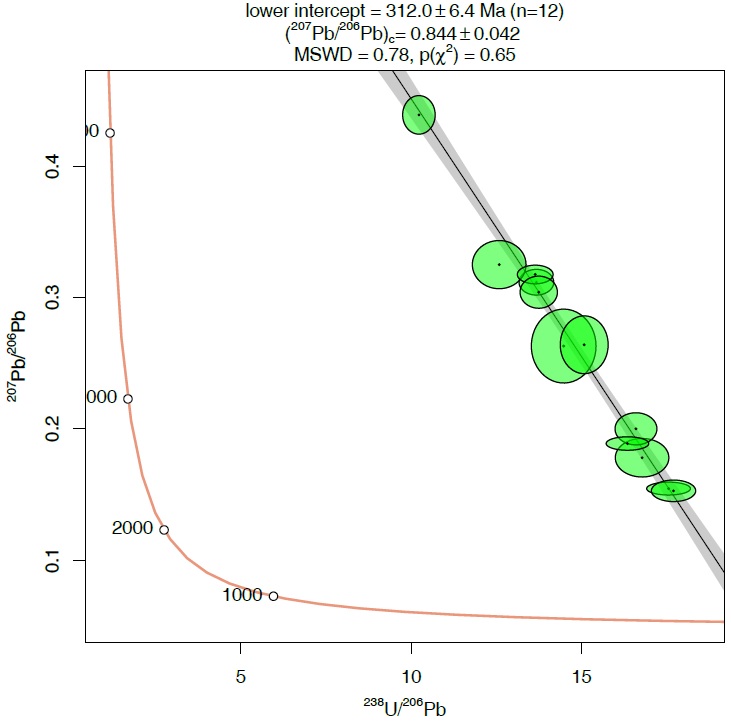


**Fig. SI 3.** Location of the spots in the spar of the conduit where U-Pb dating resulted in a constrained age.


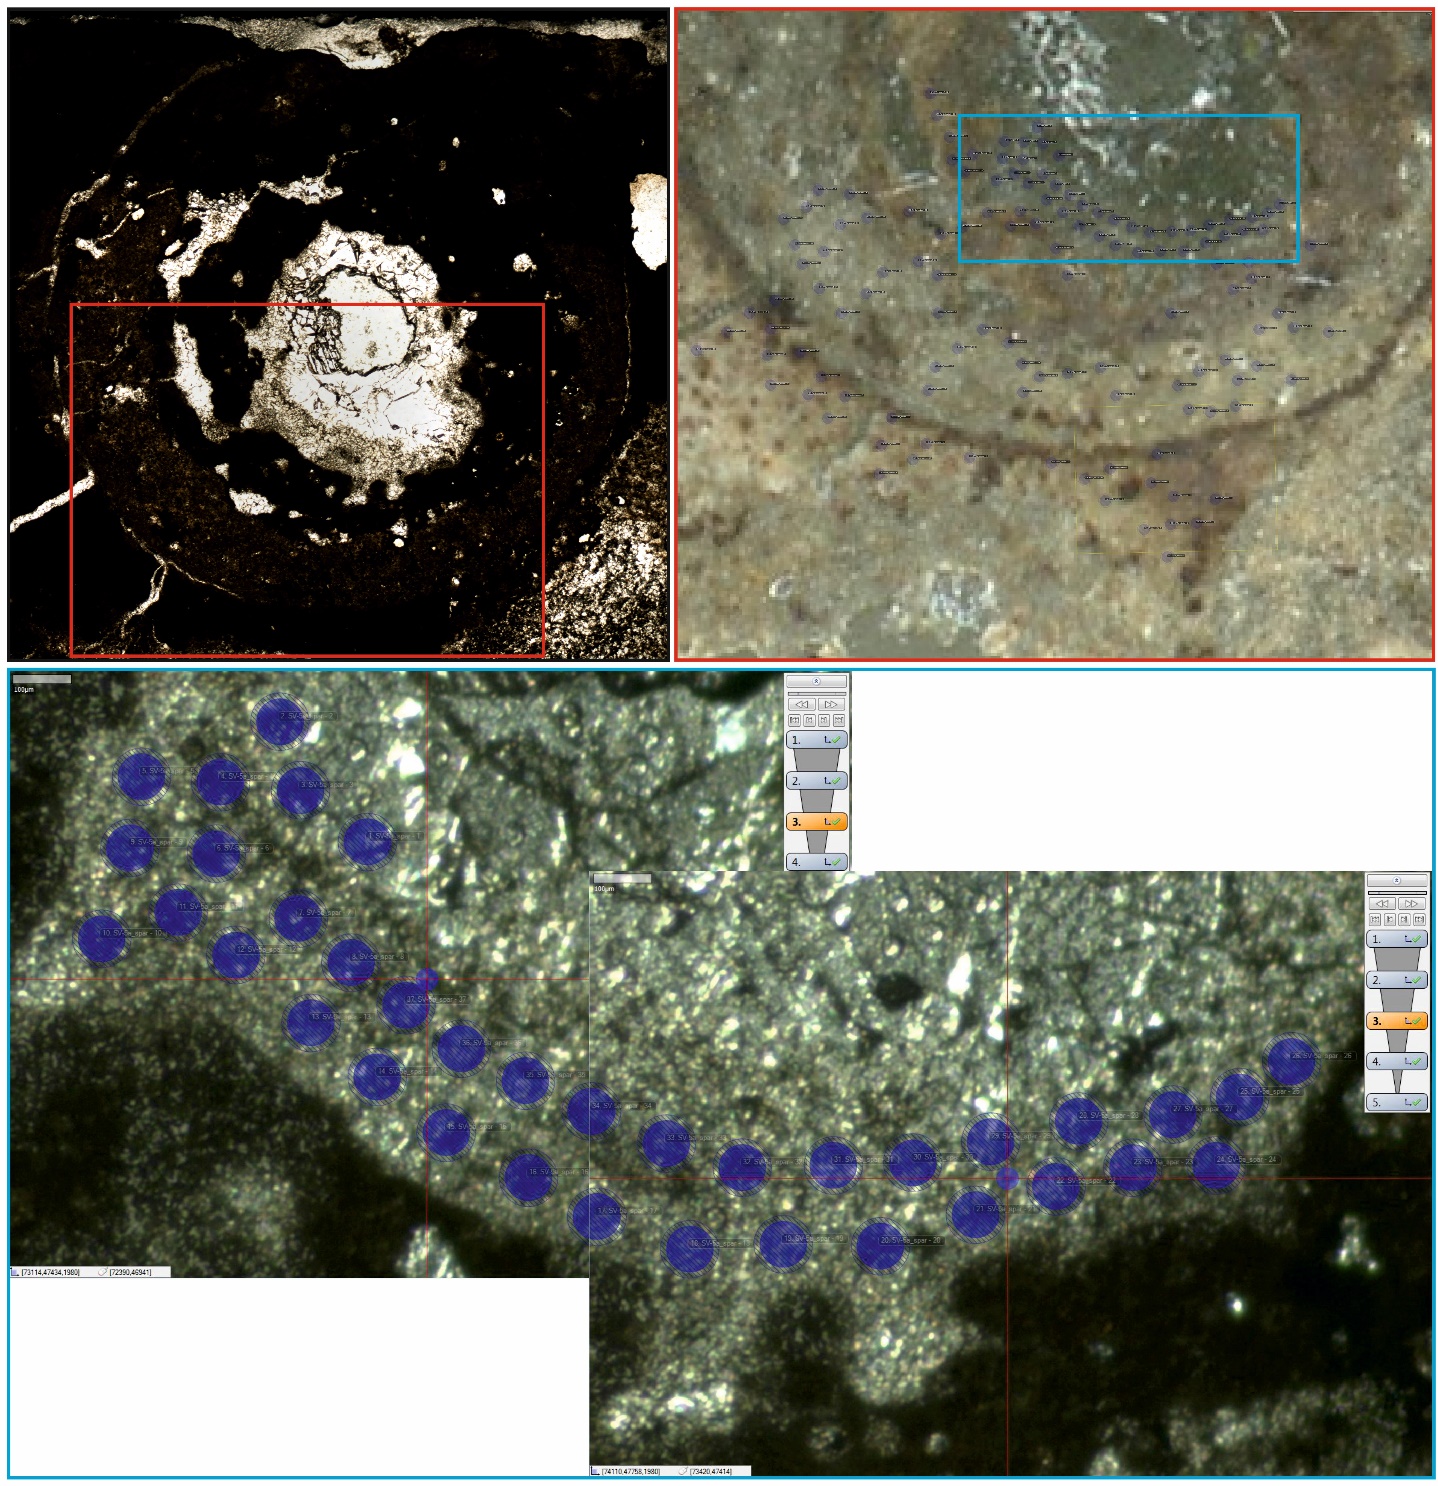


PPL image of cross section of the conduit analysed with *in situ* U-Pb

Reflected light image with location of the analysed spots

Reflected light image with location of the analysed spots in the spar where *in situ* U-Pb dating resulted in a constrained age

**Fig. SI 4.** Unconstrained ages of the concentric laminae and micrite.

**
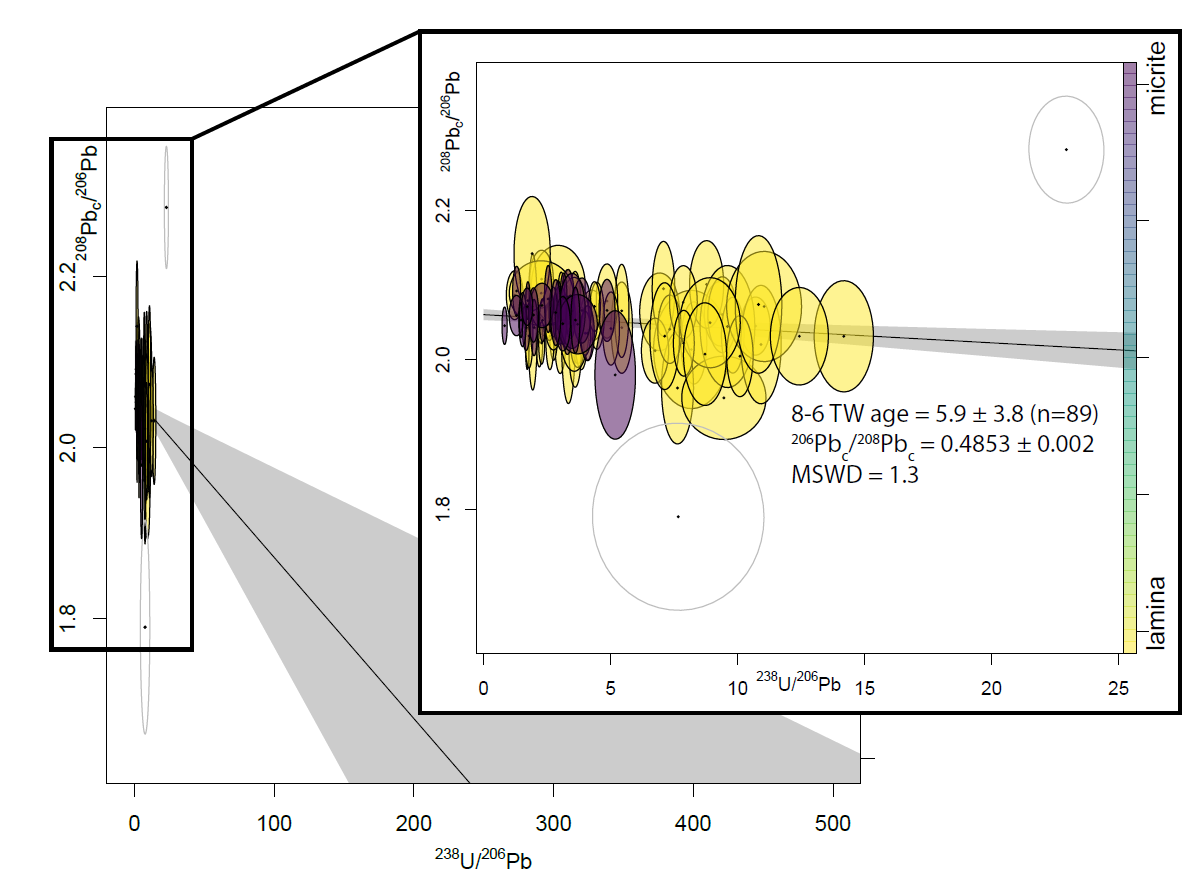
**

**RAMAN MICROSPECTROSCOPY**

**Structure and symmetry of calcite**

The trigonal structure of calcite (CaCO3) possesses the group symmetry of with a site symmetry 32(*D3*) of the isolated CO3- group (e.g. Wehrmeister *et al.*, 2010). Group theory results in 27 vibrational modes classified according to the irreducible representations of the point group (De La Pierre *et al.*, 2014):

Г total = 1×A1*g* ⊕ 2×A1*u* ⊕ 3×A2*g* ⊕ 3×A2*u* ⊕ 4×E*g* ⊕ 5×E*u*.

The doubly degenerate A1*g* and Eg modes are Raman active modes (resulting in 5 fundamental Raman modes); the doubly degenerate A2*u* and Eu modes are IR (infrared) active modes; the A1*u* and A2*g* modes are inactive (silent). The Raman spectrum of calcite can thus be divided into the primary Raman modes (~1085 cm-1 *v*1; ~1435 cm-1 *v*3; ~712 cm-1 *v*4) and lattice modes below 400 cm-1 (Scheetz and White, 1977). Experimental spectra of calcite demonstrate the appearance of additional bands at (~1068 cm-1 and 1749 cm-1), the first A1*g* band is due to the decoupling of an 18O isotope substitution from other “common” 16O atoms (which stretch at ~1087 cm-1) in the carbonate group (De La Pierre *et al.*, 2014). The second additional band (1749 cm-1) is proposed to be an overtone and bending mode of the CO3ˉ caused by the IR active mode at 874.5 cm-1 (Scheetz and White, 1977; Gillet *et al.*, 1996; De La Pierre *et al.*, 2014).

**Additional considerations**

The slightly increased FWHM values in the centre of the conduit, particularly starting in the micritic lamina, indicate a lower degree of crystallinity due to more rapid precipitation and formation of smaller crystals. The centre of the conduit consists of spar. Taking into consideration that the spectra were obtained from a cross-section of the conduit, overlapping spar crystals with different orientation may result in broader “gross” Raman signals (Spectra 14–16; Fig. 6C). Micrite is a material consisting of small calcite crystals, thus the increase in FWHM values could be a combination of smaller randomly oriented crystals with overlapping signals which result in broadening of Raman signals, and crypto crystalline cement aggregating the crystals. This is in agreement with observations of other tubular structures, which display fine microcrystalline calcite at the outer centre which then transition into blocky spar (Fig. 4C, E). Furthermore, the high FWHM values of disordered carbonaceous material present as D1, D2, D4, and D5 bands in the spectrum of the central blocky spar (Spectrum 16), may be a result of a combined signal from crystalline calcite and amorphous carbonaceous material cemented into the filling of the conduit (Fig. 6A, B).

The relative intensities of the G, D2 and D1 bands may be used to assess the maturity of carbonaceous materials and involved paleotemperatures during diagenesis, but require careful calibration (Rahl *et al.*, 2005; Allwood *et al.*, 2006). Such calibration was not done in this work, however, comparison of the spectral parameters with literature may provide a tentative temperature range. In disordered organic matter, the G band disappears and the D2 band or a combination band (D2 + G) becomes prominent (Allwood *et al.*, 2006; Kouketsu *et al.*, 2014). Considering the combined G+D2 band as the G band of disordered carbonaceous materials I(D1)/[I(G)+I(D1)] may be a tentative approach of paleothermometry. The I(D1)/[I(G)+I(D1)], calculated for spectra taken in the transect of a conduit (Spectra 8–14, and Spectrum 16), range from 0.33 to 0.44 (except Spectra 14 with 0.15). These values correlate to a low temperature (< 200 °C) estimated by similarly low values (ca. 0.42–0.50) of Raman spectra of stromatolitic carbonates (Allwood *et al.*, 2006). According to Kouketsu *et al.* (2014) the Raman signals at the range of > 1600 cm-1 solely belong to the D2 band, and the G band is absent. The D2 band would correspond to amorphous carbon such as kerogen (Kouketsu *et al.*, 2014). Deconvoluted spectra without a G band, including only a D2 band of disordered, amorphous OM are corresponding to an estimated temperature of ca. 150–280 °C, whereas in the cases of Raman spectra with a distinct low-intense G band would then correspond to a temperature > 280 °C (cf. Kouketsu *et al.*, 2014). Comparison of data with both approaches fit to relatively low temperature environments < 200 °C after Allwood *et al.* (2006) or 150–280 °C after Kouketsu *et al.* (2014). However, correct approaches towards the paleothermometry is still disputed, particularly at relatively low temperature where the thermometer rapidly reaches its limitations (Allwood *et al.*, 2006; Kouketsu *et al.*, 2014; Henry *et al.*, 2019). Such temperature estimations are more or less in line with the ones expected for the generation of hydrocarbons (ca. 70–200 °C), but more precise temperature reconstructions are difficult to obtain from the measured spectra.

**REFERENCES**

Allwood AC, Walter MR, Marshall CP (2006) Raman spectroscopy reveals thermal palaeoenvironments of c.3.5 billion-year-old organic matter. Vibrational Spectroscopy 41(2): 190–197. <https://doi.org/10.1016/j.vibspec.2006.02.006>

De La Pierre M, Carteret C, Lorenzo M, André E, Orlando R, Dovesi R (2014) The Raman spectrum of CaCO3 polymorphs calcite and aragonite: A combined experimental and computational study. J Chem Phys 140: 164509. <https://doi.org/10.1063/1.4871900>

Gillet P, McMillan P, Schott J, Badro J, Grzechnik A (1996) Thermo-dynamic properties and isotopic fractionation of calcite from vibrational spectroscopy of 18O-substituted calcite. Geochim Cosmochim Acta 60: 3471–3485. <https://doi.org/10.1016/0016-7037(96)00178-0>

Guillong M, Samankassou E, Müller IA, Szymanowski D, Looser N, Tavazzani L, Merino-Tomé O, Bahamonde JR, Buret Y, Ovtcharova M (2024) RA138 calcite U–Pb LA-ICP-MS primary reference material. Geochronology 6(3): 465–474. https://doi.org/10.5194/gchron-6-465-2024

Henry GH, Jarvis I, Gillmore G, Stephenson M (2019) Raman spectroscopy as a tool to determine the thermal maturity of organic matter: Application to sedimentary, metamorphic and structural geology. Earth-Sci Rev 198: 102936. <https://doi.org/10.1016/j.earscirev.2019.102936>

Hill CA, Polyak VJ, Asmerom YP, Provencio P (2016) Constraints on a Late Cretaceous uplift, denudation, and incision of the Grand Canyon region, southwestern Colorado Plateau, USA, from U-Pb dating of lacustrine limestone. Tectonics 35: 896–906. <https://doi.org/10.1002/2016TC004166>

Kouketsu Y, Mizukami T, Mori H, Endo S, Aoya M, Hara H, Nakamura D, Wallis S (2014) A new approach to develop the Raman carbonaceous material geothermometer for low-grade metamorphism using peak width. Island Arc 23: 33–50. <https://doi.org/10.1111/iar.12057>

Rahl JM, Anderson KM, Brandon MT, Fassoulas C (2005) Raman spectroscopic carbonaceous material thermometry of low-grade metamorphic rocks: Calibration and application to tectonic exhumation in Crete, Greece: Earth Planet Sci Lett 240: 339–354. <https://doi.org/10.1016/j.epsl.2005.09.055>

Roberts NMW, Rasbury ET, Parrish RR, Smith CJ, Horstwood MSA, Condon DJ (2017) A calcite reference material for LA-ICP-MS U-Pb geochronology. Geochem Geophys Geosyst 18: 2807–2814. <https://doi.org/10.1002/2016GC006784>

Scheetz B, White W (1977) Vibrational spectra of the alkaline earth double carbonates. Am Mineral 62: 36–50.

Wehrmeister U, Soldati AL, Jacob DE, Häger T, Hofmeister W (2010) Raman spectroscopy of synthetic, geological and biological vaterite: A Raman spectroscopic study. J Raman Spectr 41: 193–201. <https://doi.org/10.1002/jrs.2438>
