# Supplementary material
Source: Research Square preprint supplement (doi:10.21203/rs.3.rs-9200516/v1)
Supplement: Supplementary file 2 [file 951689ce215923ab92ba52de.xlsx]

## Sheet: Transect
Spectral data of a transect from the rim into the centre of a tube (sample SV-5).
micrite		micrite		outer lamina			micrite lamina			spar			blocky		1vibrational
Sp8		Sp9		Sp10	Sp11		Sp12	Sp13		Sp14	Sp15		Sp16		modes
144 (0.09)		155 (0.05)			156 (0.07)					157 (0.06)			157 (0.09)		T mode
251 (0.05)		255 (0.05)		258 (0.06)				246 (0.08)			254 (0.06)
281 (0.18)		281 (0.18)		281 (0.19)	281 (0.13)			282 (0.20)		283 (0.18)	281 (0.16)		283 (0.14)		L mode
										652 (0.08)			654 (0.10)
										770 (0.08)			762 (0.10)		v4
883 (0.10)		885 (0.10)		883 (0.15)	887 (0.20)		882 (0.29)	887 (0.27)		882 (0.09)	884 (0.14)		884 (0.11)
971 (0.15)		973 (0.14)		972 (0.22)	972 (0.30)		975 (0.38)	970 (0.33)		975 (0.14)	974 (0.21)		978 (0.16)
1075 (0.11)		1073 (0.15)		1075 (0.19)	1068 (0.20)		1071 (0.56)	1065 (0.17)		1077 (0.20)	1072 (0.16)		1077 (0.27)
1086 (1.00)		1086 (1.00)		1086 (1.00)	1086 (1.00)		1086 (1.00)	1086 (1.00)		1087 (1.00)	1086 (1.00)		1086 (1.00)		v1
1239 (0.13)				1240 (0.18)	1239 (0.26)		1231 (0.51)	1239 (0.19)		1236 (0.23)	1236 (0.12)		1236 (0.78)		D4
1336 (0.13)				1336 (0.21)	1342 (0.25)		1338 (0.60)	1347 (0.23)		1341 (0.18)	1336 (0.21)		1345 (0.57)		D1
1433 (0.14)				1435 (0.10)	1436 (0.28)		1428 (0.22)	1434 (0.28)		1436 (0.21)			1428 (0.32)		D5/D6
				1552 (0.17)	1543 (0.16)					1543 (0.30)					G/D3
1628 (0.26)		1627 (0.20)		1626 (0.27)	1633 (0.47)		1634 (0.77)	1630 (0.36)		1639 (0.99)	1654 (0.26)		1650 (0.90)		D2
1740 (0.24)		1739 (0.13)		1740 (0.21)	1736 (0.43)		1785 (0.27)	1744 (0.34)		1739 (1.25)			1742 (1.16)		overtone
													1814 (0.28)
notes:
intensities in brackets are normalized to primary Raman band v1(CO3) symmetric stretching band (marked in bold); only bands with an intensity of ≥ 0.05 are displayed
1 - vibrational modes derived from the literature (Sadezky et al. 2005; Wehrmeister et al. 2010; De La Pierre et al. 2014; Borromeo et al. 2017)
T mode - translational lattice mode
L mode - librational mode
v4 - in-plane bending mode
v1 - symmetric stretching mode
D1 - in-plane defects (Beny-Bassez and Rouzaud, 1985)
D2 - shoulder of G band in low ordered organic matter up to a combination band of G+D2 (Allwood et al., 2006)
D3- out-plane defects (Beny-Bassez and Rouzaud, 1985)
D4 - disordered graphite lattice (A1g symmetry)
D5/D6 - related to hydrocarbons trapped in micropores of organic matter (Romero-Sarmiento et al. 2014; Henry et al. 2019)
G - graphite band (E2g2) in-plane vibration of the aromatic carbons in the graphite structure (D46h) (Beny-Bassez and Rouzaud, 1985)
References:
Allwood, A.C., Walter, M.R., Marshall C.P. (2006) Raman spectroscopy reveals thermal palaeoenvironments of c.3.5 billion-year-old organic matter. Vibrational Spectroscopy, 41, 190-197.
Beny-Bassez, C., Rouzaud, J., N. (1985) Characterization of Carbonaceous Materials By Correlated Electron and Optical Microscopy and Raman Microspectroscopy. Scanning Electron Microscopy, 1985, 119-132, available at https://digitalcommons.usu.edu/electron/vol1985/iss1/11
Borromeo, L., Zimmermann, U., Andò, S., Coletti, G., Bersani, D., Basso, D., Gentile, P., Schulz, B., Garzanti, E. (2017) Raman spectroscopy as a tool for magnesium estimation in Mg-calcite. Journal of Raman Spectroscopy, 7, 963-992, 10.1002/jrs.5156
De la Pierre, M., Carteret, C., Machino, L., André, E., Orlando, R., Dovesi, R. (2014) The Raman spectrum of CaCO3 polymorphs calcite and aragonite: A combined experimental and computational study. Journal of Chemical Physics, 140, 164509, 10.1063/1.4871900
Sadezky, A., Muckenhuber, H., Grothe, H., Niessner, R., and Pöschl, U. (2005) Raman microspectroscopy of soot and related carbonaceous materials: Spectral analysis and structural information. Carbon, 8, 1731-1742, 10.1016/j.carbon.2005.02.018
Wehrmeister, U., Soldati, A., L., Jacob, D., E., Häger, T., and Hofmeister, W. (2010) Raman spectroscopy of synthetic, geological and biological vaterite: A Raman spectroscopic study. Jounral of Raman Spectroscopy, 2, 193-201, 10.1002/jrs.2438
Romero-Sarmiento, M.-F., Rouzaud, J.-N., Bernard, S., Deldicque, D., Thomas, M., Littke, R. (2014) Evolution of Barnett Shale organic carbon structure and nanostructure with increasing maturation. Organic Geochemistry, 71, 7-16.
Henry, G.H., Jarvis I., Gillmore, G., Stephenson, M. (2019) Raman spectroscopy as a tool to determine the thermal maturity of organic matter: Application to sedimentary, metamorphic and structural geology. Earth-Science Reviews, 198, 102936.

## Sheet: Calcite
Spectral data of calcite from various domains in sample SV-5.
micrite				cavities				conduit			1vibrational
Sp1	Sp2	Sp3		Sp4	Sp5	Sp6		Sp7	Sp17		modes
	148 (0.10)	153 (0.06)			156 (0.08)	157 (0.05)			158 (0.19)		T mode
								206 (1.57)
				242 (0.07)				264 (0.43)
280 (0.17)	280 (0.23)	281 (0.17)		283 (0.21)	282 (0.17)	283 (0.16)			282 (0.34)		L mode
								465 (6.80)
								652 (0.27)	652 (0.26)		v4
								776 (0.25)	769 (0.31)
885 (0.19)	886 (0.14)	887 (0.07)		887 (0.24)	887 (0.05)	891 (0.09)		887 (0.36)	884 (0.33)
970 (0.25)	970 (0.18)	973 (0.10)		972 (0.36)	971 (0.07)	970 (0.11)		974 (0.44)	976 (0.41)
	1073 (0.17)	1066 (0.08)		1065 (0.15)	1075 (0.09)			1075 (0.60)	1075 (0.61)		v1
1086 (1.00)	1086 (1.00)	1086 (1.00)		1086 (1.00)	1086 (1.00)	1087 (1.00)		1086 (1.00)	1087 (1.00)
1241 (0.20)	1233 (0.05)	1241 (0.11)			1242 (0.18)	1246 (0.05)			1238 (0.61)		D4
1346 (0.23)	1343 (0.21)	1339 (0.12)			1342 (0.21)	1348 (0.08)			1337 (0.73)		D1
1429 (0.20)	1441 (0.12)	1430 (0.06)			1430 (0.13)	1432 (0.11)			1430 (0.42)		D5/6
											G/D3
1627 (0.13)	1634 (0.22)	1625 (0.13)			1634 (0.24)	1735 (0.25)			1645 (1.79)		D2
1745 (0.33)	1741 (0.46)	1738 (0.14)			1740 (0.27)				1742 (2.26)		overtone
									1814 (0.84)
notes:
intensities in brackets are normalized to primary Raman band v1(CO3) symmetric stretching band (marked in bold); only bands with an intensity of ≥ 0.05 are displayed
1 - vibrational modes derived from the literature (Sadezky et al. 2005; Wehrmeister et al. 2010; De La Pierre et al. 2014; Borromeo et al. 2017)
T mode - translational lattice mode
L mode - librational mode
v4 - in-plane bending mode
v1 - symmetric stretching mode
D1 - in-plane defects (Beny-Bassez and Rouzaud, 1985)
D2 - shoulder of G band in low ordered organic matter up to a combination band of G+D2 (Allwood et al., 2006)
D3- out-plane defects (Beny-Bassez and Rouzaud, 1985)
D4 - disordered graphite lattice (A1g symmetry)
D5/D6 - related to hydrocarbons trapped in micropores of organic matter (Romero-Sarmiento et al. 2014; Henry et al. 2019)
G - graphite band (E2g2) in-plane vibration of the aromatic carbons in the graphite structure (D46h) (Beny-Bassez and Rouzaud, 1985)
References:
Allwood, A.C., Walter, M.R., Marshall C.P. (2006) Raman spectroscopy reveals thermal palaeoenvironments of c.3.5 billion-year-old organic matter. Vibrational Spectroscopy, 41, 190-197.
Beny-Bassez, C., Rouzaud, J., N. (1985) Characterization of Carbonaceous Materials By Correlated Electron and Optical Microscopy and Raman Microspectroscopy. Scanning Electron Microscopy, 1985, 119-132, available at https://digitalcommons.usu.edu/electron/vol1985/iss1/11
Borromeo, L., Zimmermann, U., Andò, S., Coletti, G., Bersani, D., Basso, D., Gentile, P., Schulz, B., Garzanti, E. (2017) Raman spectroscopy as a tool for magnesium estimation in Mg-calcite. Journal of Raman Spectroscopy, 7, 963-992, 10.1002/jrs.5156
De la Pierre, M., Carteret, C., Machino, L., André, E., Orlando, R., Dovesi, R. (2014) The Raman spectrum of CaCO3 polymorphs calcite and aragonite: A combined experimental and computational study. Journal of Chemical Physics, 140, 164509, 10.1063/1.4871900
Sadezky, A., Muckenhuber, H., Grothe, H., Niessner, R., and Pöschl, U. (2005) Raman microspectroscopy of soot and related carbonaceous materials: Spectral analysis and structural information. Carbon, 8, 1731-1742, 10.1016/j.carbon.2005.02.018
Wehrmeister, U., Soldati, A., L., Jacob, D., E., Häger, T., and Hofmeister, W. (2010) Raman spectroscopy of synthetic, geological and biological vaterite: A Raman spectroscopic study. Jounral of Raman Spectroscopy, 2, 193-201, 10.1002/jrs.2438
Romero-Sarmiento, M.-F., Rouzaud, J.-N., Bernard, S., Deldicque, D., Thomas, M., Littke, R. (2014) Evolution of Barnett Shale organic carbon structure and nanostructure with increasing maturation. Organic Geochemistry, 71, 7-16.
Henry, G.H., Jarvis I., Gillmore, G., Stephenson, M. (2019) Raman spectroscopy as a tool to determine the thermal maturity of organic matter: Application to sedimentary, metamorphic and structural geology. Earth-Science Reviews, 198, 102936.

## Sheet: Sp. 1-3
Sp1_140-1800									Sp2_140-1150									Sp2_1000-1800									Sp3_140-1150									Sp3_1000-1800
	Peak #	Peak Type	Center X	Height	FWHH	Other	Area			Peak #	Peak Type	Center X	Height	FWHH	Other	Area			Peak #	Peak Type	Center X	Height	FWHH	Other	Area			Peak #	Peak Type	Center X	Height	FWHH	Other	Area			Peak #	Peak Type	Center X	Height	FWHH	Other	Area
	1	Gaussian/Lorentzian	280.412	10718	20.8943	0.4651	298743			1	Gaussian/Lorentzian	148	1851.84	15.1535	0.5078	36821.7			1	Gaussian/Lorentzian	1069.11	2900.97	29.1578	0.5622	108643			1	Gaussian/Lorentzian	152.582	1805.23	13.5296	0.5019	32125.3			1	Gaussian/Lorentzian	1068.77	2409.02	35.7871	0.5528	111123
	2	Gaussian/Lorentzian	885.166	11822.3	50.2202	0.4426	797669			2	Gaussian/Lorentzian	280.022	4127.93	19.8892	0.4445	110306			2	Gaussian/Lorentzian	1086.01	19054.7	6.3689	0.5748	155266			2	Gaussian/Lorentzian	280.646	5672.33	20.2588	0.4761	152560			2	Gaussian/Lorentzian	1086.27	32652.5	6.6102	0.7029	262174
	3	Gaussian/Lorentzian	970.183	15840.8	42.0905	0.4843	882185			3	Gaussian/Lorentzian	885.943	2507.13	41.0219	0.5502	132525			3	Gaussian/Lorentzian	1233.21	3620.11	56.5302	0.7001	248449			3	Gaussian/Lorentzian	886.343	2249.38	40.4675	0.5001	119566			3	Gaussian/Lorentzian	1241.06	3507.96	52.3131	0.6092	231204
	4	Gaussian/Lorentzian	1086.02	62229.3	7.3466	0.3745	631207			4	Gaussian/Lorentzian	969.739	3299.55	34.5711	0.5618	146390			4	Gaussian/Lorentzian	1343.56	5530.88	40.9248	0.5725	289413			4	Gaussian/Lorentzian	972.44	3409.75	35.655	0.5171	158718			4	Gaussian/Lorentzian	1339.19	4055.68	47.19	0.5797	243999
	5	Gaussian/Lorentzian	1240.37	12576.7	58.2777	0.4474	982571			5	Gaussian/Lorentzian	1070.5	2864.41	32.1476	0.5639	118093			5	Gaussian/Lorentzian	1442.34	3343.78	44.6711	0.3323	208905			5	Gaussian/Lorentzian	1066.76	2265.2	30.8592	0.5146	91377.2			5	Gaussian/Lorentzian	1429.51	1803.49	72.3128	0.4918	171804
	6	Gaussian/Lorentzian	1345.77	14545.1	57.3584	0.5214	1.08764e+06			6	Gaussian/Lorentzian	1086.01	18850.2	6.2365	0.5755	150344			6	Gaussian/Lorentzian	1634.56	4179.97	66.7909	0.2242	404910			6	Gaussian/Lorentzian	1086.26	33313.4	6.5881	0.5676	281548			6	Gaussian/Lorentzian	1625.09	4349.27	75.0117	0.4524	436114
	7	Gaussian/Lorentzian	1428.75	12742.6	48.6778	0.5504	799913												7	Gaussian/Lorentzian	1741.21	4639.54	30.6523	0.4241	192514												7	Gaussian/Lorentzian	1738.22	4610.4	52.5877	0.4492	324844
	8	Gaussian/Lorentzian	1628.14	8630.35	71.663	0.4442	829556			Peak #	Peak Type	Center X	Height	FWHH	Other	Area												Peak #	Peak Type	Center X	Height	FWHH	Other	Area
	9	Gaussian/Lorentzian	1745.07	20896.6	53.9657	0.4281	1.52287e+06			1	Gaussian/Lorentzian	148.002	1851.62	15.1499	0.5099	36779.2			Peak #	Peak Type	Center X	Height	FWHH	Other	Area			1	Gaussian/Lorentzian	152.725	1868.28	12.5985	0.5063	30908.6			Peak #	Peak Type	Center X	Height	FWHH	Other	Area
										2	Gaussian/Lorentzian	280.023	4134.38	19.8277	0.4293	110762			1	Gaussian/Lorentzian	1070.29	2897.68	32.0824	0.5759	118747			2	Gaussian/Lorentzian	280.652	5701.27	20.0476	0.4143	155294			1	Gaussian/Lorentzian	1068.42	2501.55	33.3375	0.5573	107314
	Peak #	Peak Type	Center X	Height	FWHH	Other	Area			3	Gaussian/Lorentzian	885.952	2506.79	41.152	0.5611	132368			2	Gaussian/Lorentzian	1086	18810.3	6.25	0.6068	148514			3	Gaussian/Lorentzian	886.452	2252.37	40.846	0.4973	120975			2	Gaussian/Lorentzian	1086.28	32698.8	6.6463	0.7157	262570
	1	Gaussian/Lorentzian	280.414	10735.4	20.8231	0.4509	299820			4	Gaussian/Lorentzian	969.754	3299.16	34.6587	0.5739	146049			3	Gaussian/Lorentzian	1233.17	3603.83	57.0318	0.7515	244253			4	Gaussian/Lorentzian	972.538	3417.89	36.0831	0.5519	158861			3	Gaussian/Lorentzian	1241.04	3510.13	52.4664	0.6159	231405
	2	Gaussian/Lorentzian	885.182	11828.3	50.1789	0.4162	805290			5	Gaussian/Lorentzian	1070.62	2880.24	32.2699	0.5716	118842			4	Gaussian/Lorentzian	1343.5	5520.58	41.0926	0.592	287828			5	Gaussian/Lorentzian	1065.83	2756.25	21.7528	0.5322	77901.2			4	Gaussian/Lorentzian	1339.18	4067.16	47.0102	0.5875	243005
	3	Gaussian/Lorentzian	970.208	15829.7	41.8809	0.4801	878608			6	Gaussian/Lorentzian	1086.01	18815	6.2359	0.5866	149391			5	Gaussian/Lorentzian	1442.52	3356.83	44.1599	0.2751	211561			6	Gaussian/Lorentzian	1086.25	33453.7	6.7804	0.6455	282054			5	Gaussian/Lorentzian	1429.64	1810	72.1242	0.4908	172040
	4	Gaussian/Lorentzian	1086.02	62346.5	7.3022	0.3359	637462												6	Gaussian/Lorentzian	1634.52	4188.56	66.2622	0.1467	413222												6	Gaussian/Lorentzian	1625.08	4353.72	74.8084	0.4449	436587
	5	Gaussian/Lorentzian	1240.43	12598.6	58.2616	0.4285	991025			Peak #	Peak Type	Center X	Height	FWHH	Other	Area			7	Gaussian/Lorentzian	1741.28	4645.06	30.0327	0.398	190677			Peak #	Peak Type	Center X	Height	FWHH	Other	Area			7	Gaussian/Lorentzian	1738.22	4609.55	52.5597	0.4437	325278
	6	Gaussian/Lorentzian	1345.83	14550	57.2945	0.5349	1.08119e+06			1	Gaussian/Lorentzian	148.003	1851.34	15.1472	0.5121	36736.8												1	Gaussian/Lorentzian	152.723	1867.06	12.5877	0.5099	30820.3
	7	Gaussian/Lorentzian	1428.73	12743	48.7157	0.5774	792197			2	Gaussian/Lorentzian	280.024	4140.84	19.7656	0.414	111219			Peak #	Peak Type	Center X	Height	FWHH	Other	Area			2	Gaussian/Lorentzian	280.656	5721.58	19.8889	0.3705	157115			Peak #	Peak Type	Center X	Height	FWHH	Other	Area
	8	Gaussian/Lorentzian	1627.77	8536.96	73.2716	0.4261	844607			3	Gaussian/Lorentzian	885.96	2505.88	41.2907	0.5723	132189			1	Gaussian/Lorentzian	1073.83	3057.85	38.3772	0.6991	142615			3	Gaussian/Lorentzian	886.495	2253.32	41.0156	0.4947	121649			1	Gaussian/Lorentzian	1068.09	2555.68	31.6563	0.5606	103983
	9	Gaussian/Lorentzian	1745.06	20917.4	53.6325	0.4137	1.52317e+06			4	Gaussian/Lorentzian	969.768	3296.65	34.7748	0.5864	145712			2	Gaussian/Lorentzian	1086.02	17863.3	6.1566	0.7708	129808			4	Gaussian/Lorentzian	972.553	3412.73	36.2037	0.5766	157629			2	Gaussian/Lorentzian	1086.27	32753.6	6.6755	0.7243	263219
										5	Gaussian/Lorentzian	1070.88	2888.95	32.7695	0.5798	120651			3	Gaussian/Lorentzian	1233.02	3576.47	58.2288	0.8513	237114			5	Gaussian/Lorentzian	1065.97	2763.42	22.2874	0.5394	79796.7			3	Gaussian/Lorentzian	1241.02	3509.95	52.6182	0.6217	231527
	Peak #	Peak Type	Center X	Height	FWHH	Other	Area			6	Gaussian/Lorentzian	1086	18753.7	6.2206	0.5982	147859			4	Gaussian/Lorentzian	1343.42	5525.31	41.6031	0.6175	288713			6	Gaussian/Lorentzian	1086.26	33393.5	6.788	0.6627	279899			4	Gaussian/Lorentzian	1339.19	4069.97	47.0077	0.5945	242495
	1	Gaussian/Lorentzian	280.415	10753.4	20.7491	0.4358	300956												5	Gaussian/Lorentzian	1442.2	3346.14	45.1938	0.3119	213029												5	Gaussian/Lorentzian	1429.69	1813.77	71.9726	0.4898	172099
	2	Gaussian/Lorentzian	885.197	11839.2	50.1056	0.3893	812891			Peak #	Peak Type	Center X	Height	FWHH	Other	Area			6	Gaussian/Lorentzian	1634.54	4182.69	66.7283	0.197	408566			Peak #	Peak Type	Center X	Height	FWHH	Other	Area			6	Gaussian/Lorentzian	1625.07	4356.75	74.6595	0.4382	437111
	3	Gaussian/Lorentzian	970.233	15815.4	41.7006	0.4774	874969			1	Gaussian/Lorentzian	148.005	1851.05	15.1447	0.5143	36693			7	Gaussian/Lorentzian	1741.25	4641.64	30.437	0.4157	191845			1	Gaussian/Lorentzian	152.723	1866.69	12.5844	0.5111	30791.6			7	Gaussian/Lorentzian	1738.22	4608.51	52.5314	0.4387	325634
	4	Gaussian/Lorentzian	1085.98	62441.5	7.2647	0.3045	642352			2	Gaussian/Lorentzian	280.025	4147.43	19.7016	0.3983	111682												2	Gaussian/Lorentzian	280.658	5728.1	19.837	0.3566	157684
	5	Gaussian/Lorentzian	1240.48	12625.3	58.2349	0.4098	999568			3	Gaussian/Lorentzian	885.968	2504.84	41.4329	0.584	131985			Peak #	Peak Type	Center X	Height	FWHH	Other	Area			3	Gaussian/Lorentzian	886.507	2253.86	41.0657	0.4938	121869			Peak #	Peak Type	Center X	Height	FWHH	Other	Area
	6	Gaussian/Lorentzian	1345.88	14556.1	57.2481	0.55	1.07451e+06			4	Gaussian/Lorentzian	969.781	3293.72	34.8873	0.5995	145301			1	Gaussian/Lorentzian	1075.31	3270.46	40.2632	0.846	150330			4	Gaussian/Lorentzian	972.556	3411.05	36.2454	0.5849	157221			1	Gaussian/Lorentzian	1067.79	2606.27	30.2669	0.5632	101287
	7	Gaussian/Lorentzian	1428.7	12743.9	48.7965	0.6065	784534			5	Gaussian/Lorentzian	1071.29	2904.48	33.5861	0.5899	123828			2	Gaussian/Lorentzian	1085.99	17478.1	6.0589	0.9142	117317			5	Gaussian/Lorentzian	1066	2763.69	22.4114	0.5418	80172.1			2	Gaussian/Lorentzian	1086.27	32802.8	6.7026	0.7306	263980
	8	Gaussian/Lorentzian	1627.51	8471.96	74.4132	0.4082	856872			6	Gaussian/Lorentzian	1086.01	18656.1	6.1937	0.6116	145670			3	Gaussian/Lorentzian	1232.82	3560.17	59.3079	0.9126	233959			6	Gaussian/Lorentzian	1086.25	33383.1	6.7886	0.6665	279402			3	Gaussian/Lorentzian	1241	3509.15	52.7655	0.6276	231572
	9	Gaussian/Lorentzian	1745.04	20935.8	53.348	0.4	1.52417e+06												4	Gaussian/Lorentzian	1343.4	5536.7	41.9541	0.6286	290462												4	Gaussian/Lorentzian	1339.18	4070.24	47.0458	0.6017	242014
										Peak #	Peak Type	Center X	Height	FWHH	Other	Area			5	Gaussian/Lorentzian	1441.94	3340.23	46.0533	0.3567	213247			Peak #	Peak Type	Center X	Height	FWHH	Other	Area			5	Gaussian/Lorentzian	1429.65	1817.11	71.826	0.4888	172131
	Peak #	Peak Type	Center X	Height	FWHH	Other	Area			1	Gaussian/Lorentzian	148.006	1850.72	15.1425	0.5169	36644.4			6	Gaussian/Lorentzian	1634.57	4177.5	67.1858	0.2662	401199			1	Gaussian/Lorentzian	152.722	1865.87	12.5779	0.5139	30729.1			6	Gaussian/Lorentzian	1625.06	4359.35	74.5269	0.4311	437738
	1	Gaussian/Lorentzian	280.417	10769.9	20.6817	0.422	301990			2	Gaussian/Lorentzian	280.026	4154.68	19.6306	0.3809	112186			7	Gaussian/Lorentzian	1741.18	4639.09	30.9994	0.4371	193733			2	Gaussian/Lorentzian	280.661	5741.82	19.7258	0.3264	158897			7	Gaussian/Lorentzian	1738.23	4607.37	52.4961	0.4334	325968
	2	Gaussian/Lorentzian	885.212	11850	50.0429	0.3652	819772			3	Gaussian/Lorentzian	885.977	2503.84	41.5898	0.5971	131750												3	Gaussian/Lorentzian	886.535	2255.07	41.1747	0.4915	122360
	3	Gaussian/Lorentzian	970.256	15801.5	41.5561	0.4762	871592			4	Gaussian/Lorentzian	969.796	3290.77	35.0096	0.6144	144824			Peak #	Peak Type	Center X	Height	FWHH	Other	Area			4	Gaussian/Lorentzian	972.561	3407.1	36.3391	0.6034	156304			Peak #	Peak Type	Center X	Height	FWHH	Other	Area
	4	Gaussian/Lorentzian	1086.01	62505.3	7.2378	0.2823	645718			5	Gaussian/Lorentzian	1071.87	2921.78	34.674	0.6037	127892			1	Gaussian/Lorentzian	1075.77	3377.49	41.0023	0.9409	151513			5	Gaussian/Lorentzian	1066.05	2767.76	22.6463	0.5472	80962.6			1	Gaussian/Lorentzian	1067.56	2637.86	29.2938	0.5651	99149.9
	5	Gaussian/Lorentzian	1240.53	12649.7	58.227	0.3935	1007382			6	Gaussian/Lorentzian	1086.01	18530.8	6.1574	0.6292	142830			2	Gaussian/Lorentzian	1085.98	17250.1	6.0665	1	111394			6	Gaussian/Lorentzian	1086.26	33358.3	6.7915	0.6729	278587			2	Gaussian/Lorentzian	1086.27	32845.3	6.722	0.7343	264675
	6	Gaussian/Lorentzian	1345.92	14562.6	57.216	0.5645	1.06837e+06												3	Gaussian/Lorentzian	1232.64	3551.93	59.9787	0.9426	232868												3	Gaussian/Lorentzian	1240.99	3508.54	52.8806	0.6326	231568
	7	Gaussian/Lorentzian	1428.69	12746.1	48.8861	0.6335	777685			Peak #	Peak Type	Center X	Height	FWHH	Other	Area			4	Gaussian/Lorentzian	1343.38	5544.18	42.2106	0.6306	292403			Peak #	Peak Type	Center X	Height	FWHH	Other	Area			4	Gaussian/Lorentzian	1339.18	4070.04	47.086	0.608	241605
	8	Gaussian/Lorentzian	1627.34	8432.22	75.1204	0.3921	866003			1	Gaussian/Lorentzian	148.009	1850.3	15.1402	0.5203	36584			5	Gaussian/Lorentzian	1441.77	3329.17	46.8564	0.3996	212891			1	Gaussian/Lorentzian	152.721	1865.31	12.5736	0.516	30684.8			5	Gaussian/Lorentzian	1429.62	1819.76	71.7085	0.4879	172159
	9	Gaussian/Lorentzian	1745.03	20950.8	53.1257	0.3882	1.5255e+06			2	Gaussian/Lorentzian	280.027	4163.56	19.5431	0.3594	112805			6	Gaussian/Lorentzian	1634.59	4168.44	67.6696	0.3324	393915			2	Gaussian/Lorentzian	280.662	5750.96	19.6501	0.3055	159722			6	Gaussian/Lorentzian	1625.05	4361.29	74.4235	0.425	438315
										3	Gaussian/Lorentzian	885.991	2502.85	41.7907	0.6138	131467			7	Gaussian/Lorentzian	1741.06	4635.6	31.5549	0.4567	195613			3	Gaussian/Lorentzian	886.556	2256.11	41.2503	0.49	122714			7	Gaussian/Lorentzian	1738.23	4606.42	52.4615	0.4289	326235
	Peak #	Peak Type	Center X	Height	FWHH	Other	Area			4	Gaussian/Lorentzian	969.817	3287.62	35.1768	0.6334	144277												4	Gaussian/Lorentzian	972.565	3404.34	36.4056	0.6169	155628
	1	Gaussian/Lorentzian	280.42	10795.1	20.5789	0.4011	303532			5	Gaussian/Lorentzian	1072.57	2949.16	35.9628	0.6258	132712			Peak #	Peak Type	Center X	Height	FWHH	Other	Area			5	Gaussian/Lorentzian	1066.08	2766.6	22.78	0.551	81286.4			Peak #	Peak Type	Center X	Height	FWHH	Other	Area
	2	Gaussian/Lorentzian	885.241	11865.6	49.9699	0.3298	830204			6	Gaussian/Lorentzian	1086	18374.2	6.118	0.6555	139222			1	Gaussian/Lorentzian	1075.77	3383.19	41.0023	0.9409	151768			6	Gaussian/Lorentzian	1086.26	33337.1	6.7969	0.6759	278283			1	Gaussian/Lorentzian	1067.37	2664.8	28.4999	0.5666	97393.4
	3	Gaussian/Lorentzian	970.292	15777.6	41.3663	0.4763	866273												2	Gaussian/Lorentzian	1085.98	17248.9	6.0665	1	111386												2	Gaussian/Lorentzian	1086.26	32882.2	6.7378	0.7365	265346
	4	Gaussian/Lorentzian	1085.98	62576.8	7.2066	0.2577	649269			Peak #	Peak Type	Center X	Height	FWHH	Other	Area			3	Gaussian/Lorentzian	1232.64	3564.17	59.9787	0.9426	233670			Peak #	Peak Type	Center X	Height	FWHH	Other	Area			3	Gaussian/Lorentzian	1240.97	3508	52.9835	0.6375	231525
	5	Gaussian/Lorentzian	1240.6	12687.5	58.2462	0.37	1.01943e+06			1	Gaussian/Lorentzian	148.036	1846.68	15.1438	0.5588	35980.7			4	Gaussian/Lorentzian	1343.38	5588.02	42.2106	0.6306	294715			1	Gaussian/Lorentzian	152.72	1864.55	12.5708	0.5186	30634.1			4	Gaussian/Lorentzian	1339.18	4069.72	47.1269	0.6142	241203
	6	Gaussian/Lorentzian	1345.98	14574.7	57.1658	0.5876	1.05873e+06			2	Gaussian/Lorentzian	280.033	4246.72	18.6915	0.1512	118371			5	Gaussian/Lorentzian	1441.77	3365.85	46.8564	0.5	207317			2	Gaussian/Lorentzian	280.665	5762	19.5579	0.281	160670			5	Gaussian/Lorentzian	1429.59	1822.23	71.5988	0.487	172186
	7	Gaussian/Lorentzian	1428.66	12751.9	49.0408	0.6747	767590			3	Gaussian/Lorentzian	886.185	2504.53	44.0808	0.7897	129087			6	Gaussian/Lorentzian	1634.59	4186.63	67.6696	0.5	372024			3	Gaussian/Lorentzian	886.582	2257.48	41.3418	0.4879	123158			6	Gaussian/Lorentzian	1625.05	4362.95	74.3303	0.419	438906
	8	Gaussian/Lorentzian	1627.17	8394.59	75.8087	0.3681	877668			4	Gaussian/Lorentzian	970.248	3277.86	37.7287	0.8298	142153			7	Gaussian/Lorentzian	1741.06	4741.29	31.5549	0.5	196818			4	Gaussian/Lorentzian	972.572	3400.9	36.4879	0.6334	154799			7	Gaussian/Lorentzian	1738.23	4605.54	52.424	0.4244	326479
	9	Gaussian/Lorentzian	1745.01	20971.5	52.8298	0.3716	1527772			5	Gaussian/Lorentzian	1076.25	3404.64	41.3693	0.9889	150707												5	Gaussian/Lorentzian	1066.1	2767.99	22.9173	0.5555	81672.5
										6	Gaussian/Lorentzian	1085.98	17196	6.0441	1	110635			Peak #	Peak Type	Center X	Height	FWHH	Other	Area			6	Gaussian/Lorentzian	1086.26	33341.8	6.7915	0.6784	277811			Peak #	Peak Type	Center X	Height	FWHH	Other	Area
	Peak #	Peak Type	Center X	Height	FWHH	Other	Area												1	Gaussian/Lorentzian	1075.93	3380.98	41.0116	0.9434	151523												1	Gaussian/Lorentzian	1067.22	2686.16	27.876	0.5678	95982.4
	1	Gaussian/Lorentzian	280.402	10979.8	19.7872	0.2321	315393			Peak #	Peak Type	Center X	Height	FWHH	Other	Area			2	Gaussian/Lorentzian	1085.98	17228.6	6.0605	1	111145			Peak #	Peak Type	Center X	Height	FWHH	Other	Area			2	Gaussian/Lorentzian	1086.26	32912.8	6.7499	0.7376	265942
	2	Gaussian/Lorentzian	885.641	11892.1	50.0219	0.0505	916253			1	Gaussian/Lorentzian	148.036	1846.68	15.1438	0.5588	35980.7			3	Gaussian/Lorentzian	1232.22	3513.24	59.5608	0.9447	228501			1	Gaussian/Lorentzian	152.72	1864.19	12.5705	0.5197	30615.1			3	Gaussian/Lorentzian	1240.96	3507.56	53.0726	0.6421	231459
	3	Gaussian/Lorentzian	970.52	15516.5	40.2162	0.491	823730			2	Gaussian/Lorentzian	280.033	4246.72	18.6915	0.1512	118371			4	Gaussian/Lorentzian	1343.09	5325.8	45.8607	0.5049	320399			2	Gaussian/Lorentzian	280.665	5766.12	19.5228	0.2714	161037			4	Gaussian/Lorentzian	1339.18	4069.34	47.1658	0.62	240818
	4	Gaussian/Lorentzian	1085.99	62970.1	7.0143	0.1207	666540			3	Gaussian/Lorentzian	886.185	2504.53	44.0808	0.7897	129087			5	Gaussian/Lorentzian	1439.71	3181.86	50.3363	0.4992	210505			3	Gaussian/Lorentzian	886.593	2257.85	41.3852	0.487	123347			5	Gaussian/Lorentzian	1429.57	1824.47	71.501	0.4862	172215
	5	Gaussian/Lorentzian	1240.89	12947.3	58.5559	0.1979	1.11121e+06			4	Gaussian/Lorentzian	970.249	3277.86	37.7287	0.8298	142153			6	Gaussian/Lorentzian	1633.7	4514.12	54.2042	0.4942	322124			4	Gaussian/Lorentzian	972.572	3399.49	36.5206	0.6401	154459			6	Gaussian/Lorentzian	1625.04	4364.42	74.247	0.4133	439478
	6	Gaussian/Lorentzian	1346.27	14612.1	57.6222	0.7755	990848			5	Gaussian/Lorentzian	1076.26	3404.65	41.3693	0.9889	150707			7	Gaussian/Lorentzian	1740.52	3949.34	46.8882	0.4983	243505			5	Gaussian/Lorentzian	1066.11	2766.34	22.9643	0.5573	81732.4			7	Gaussian/Lorentzian	1738.24	4604.74	52.386	0.4202	326692
	7	Gaussian/Lorentzian	1428.79	12750.6	50.3073	1	682806			6	Gaussian/Lorentzian	1085.98	17195.9	6.0441	1	110634												6	Gaussian/Lorentzian	1086.25	33332.4	6.7946	0.6792	277777
	8	Gaussian/Lorentzian	1626.47	8211.44	79.4797	0.155	969317												Peak #	Peak Type	Center X	Height	FWHH	Other	Area												Peak #	Peak Type	Center X	Height	FWHH	Other	Area
	9	Gaussian/Lorentzian	1745.08	21021.8	50.9833	0.2418	1.5479e+06			Peak #	Peak Type	Center X	Height	FWHH	Other	Area			1	Gaussian/Lorentzian	1075.98	3359.26	41.0847	0.9515	150260			Peak #	Peak Type	Center X	Height	FWHH	Other	Area			1	Gaussian/Lorentzian	1067.11	2708.64	27.3844	0.5688	95044.3
										1	Gaussian/Lorentzian	148.036	1846.68	15.1438	0.5588	35980.7			2	Gaussian/Lorentzian	1085.97	17136.3	6.1399	1	111997			1	Gaussian/Lorentzian	152.719	1863.9	12.5682	0.5211	30587.8			2	Gaussian/Lorentzian	1086.28	32934.6	6.7595	0.738	266455
	Peak #	Peak Type	Center X	Height	FWHH	Other	Area			2	Gaussian/Lorentzian	280.033	4246.72	18.6915	0.1512	118371			3	Gaussian/Lorentzian	1232.56	3548.04	59.3865	0.9488	229657			2	Gaussian/Lorentzian	280.667	5771.46	19.4771	0.2592	161499			3	Gaussian/Lorentzian	1240.95	3507.14	53.151	0.6464	231370
	1	Gaussian/Lorentzian	280.402	10979.8	19.7872	0.2321	315393			3	Gaussian/Lorentzian	886.185	2504.53	44.0808	0.7897	129087			4	Gaussian/Lorentzian	1343.47	5626.3	41.3939	0.5112	304872			3	Gaussian/Lorentzian	886.609	2258.52	41.4351	0.4858	123588			4	Gaussian/Lorentzian	1339.18	4068.93	47.2022	0.6255	240446
	2	Gaussian/Lorentzian	885.641	11892.1	50.0219	0.0505	916253			4	Gaussian/Lorentzian	970.249	3277.86	37.7287	0.8298	142153			5	Gaussian/Lorentzian	1441.42	3264.45	48.7537	0.4901	209939			4	Gaussian/Lorentzian	972.575	3397.65	36.562	0.6487	154013			5	Gaussian/Lorentzian	1429.54	1826.51	71.4137	0.4855	172247
	3	Gaussian/Lorentzian	970.52	15516.5	40.2162	0.491	823730			5	Gaussian/Lorentzian	1076.26	3404.66	41.3693	0.9889	150708			6	Gaussian/Lorentzian	1634.25	4315.12	61.8711	0.4793	353351			5	Gaussian/Lorentzian	1066.11	2768.56	23.0227	0.5598	81927.8			6	Gaussian/Lorentzian	1625.03	4365.72	74.1709	0.4079	440026
	4	Gaussian/Lorentzian	1085.99	62970.1	7.0143	0.1207	666540			6	Gaussian/Lorentzian	1085.98	17195.8	6.0441	1	110634			7	Gaussian/Lorentzian	1740.76	4363.74	37.8329	0.4959	217422			6	Gaussian/Lorentzian	1086.26	33327.7	6.7952	0.6799	277670			7	Gaussian/Lorentzian	1738.24	4604.05	52.3481	0.4162	326886
	5	Gaussian/Lorentzian	1240.89	12947.3	58.5559	0.1979	1.11121e+06
	6	Gaussian/Lorentzian	1346.27	14612.1	57.6222	0.7755	990848			Peak #	Peak Type	Center X	Height	FWHH	Other	Area			Peak #	Peak Type	Center X	Height	FWHH	Other	Area			Peak #	Peak Type	Center X	Height	FWHH	Other	Area			Peak #	Peak Type	Center X	Height	FWHH	Other	Area
	7	Gaussian/Lorentzian	1428.79	12750.6	50.3073	1	682806			1	Gaussian/Lorentzian	148.036	1846.68	15.1438	0.5588	35980.7			1	Gaussian/Lorentzian	1075.97	3380.26	41.0855	0.9522	151155			1	Gaussian/Lorentzian	152.719	1863.73	12.5668	0.522	30571.1			1	Gaussian/Lorentzian	1067	2723.39	26.929	0.5697	93940.3
	8	Gaussian/Lorentzian	1626.47	8211.44	79.4797	0.155	969317			2	Gaussian/Lorentzian	280.033	4246.72	18.6915	0.1512	118371			2	Gaussian/Lorentzian	1085.99	17222.2	6.0583	1	111063			2	Gaussian/Lorentzian	280.667	5774.71	19.4494	0.252	161770			2	Gaussian/Lorentzian	1086.28	32960.4	6.7679	0.7378	267019
	9	Gaussian/Lorentzian	1745.08	21021.8	50.9833	0.2418	1.5479e+06			3	Gaussian/Lorentzian	886.186	2504.53	44.0808	0.7897	129087			3	Gaussian/Lorentzian	1232.44	3508.29	59.3082	0.9493	226731			3	Gaussian/Lorentzian	886.618	2258.96	41.4658	0.4851	123737			3	Gaussian/Lorentzian	1240.95	3506.86	53.2325	0.6512	231259
										4	Gaussian/Lorentzian	970.249	3277.86	37.7287	0.8298	142153			4	Gaussian/Lorentzian	1343.95	5136.54	48.7945	0.5013	329170			4	Gaussian/Lorentzian	972.577	3396.63	36.5865	0.654	153741			4	Gaussian/Lorentzian	1339.18	4068.51	47.2421	0.6317	240027
	Peak #	Peak Type	Center X	Height	FWHH	Other	Area			5	Gaussian/Lorentzian	1076.26	3404.67	41.3693	0.9889	150708			5	Gaussian/Lorentzian	1436.35	3119.55	50.099	0.4999	205353			5	Gaussian/Lorentzian	1066.12	2766.75	23.0566	0.5612	81947.8			5	Gaussian/Lorentzian	1429.51	1828.75	71.3208	0.4846	172288
	1	Gaussian/Lorentzian	280.402	10979.8	19.7872	0.2321	315393			6	Gaussian/Lorentzian	1085.98	17195.8	6.0441	1	110634			6	Gaussian/Lorentzian	1634.38	4593.39	51.1515	0.4987	308849			6	Gaussian/Lorentzian	1086.25	33327.2	6.7949	0.6803	277611			6	Gaussian/Lorentzian	1625.02	4367.08	74.0898	0.4019	440641
	2	Gaussian/Lorentzian	885.641	11892.1	50.0219	0.0505	916253												7	Gaussian/Lorentzian	1737.42	3835.98	49.3751	0.4995	248905												7	Gaussian/Lorentzian	1738.24	4603.29	52.3046	0.4118	327093
	3	Gaussian/Lorentzian	970.52	15516.5	40.2162	0.491	823730			Peak #	Peak Type	Center X	Height	FWHH	Other	Area												Peak #	Peak Type	Center X	Height	FWHH	Other	Area
	4	Gaussian/Lorentzian	1085.99	62970.1	7.0143	0.1207	666540			1		148.017	1849.36	15.1453	0.53165	36418.2			Peak #	Peak Type	Center X	Height	FWHH	Other	Area			1		152.707	1859.48	12.6728	0.51405	30846.8			Peak #	Peak Type	Center X	Height	FWHH	Other	Area
	5	Gaussian/Lorentzian	1240.89	12947.3	58.5559	0.1979	1.11121e+06			2		280.028	4185.57	19.3124	0.30312	114244			1		1074.22	3223.13	38.3408	0.823567	141839			2		280.66	5739.03	19.7415	0.3313	158625			1	Gaussian/Lorentzian	1066.92	2733.59	26.6057	0.5704	93135.1
	6	Gaussian/Lorentzian	1346.27	14612.1	57.6222	0.7755	990848			3		886.053	2504.95	42.4601	0.66373	130863			2		1085.99	17699.2	6.13623	0.874067	123099			3		886.529	2255.29	41.1448	0.49132	122296			2	Gaussian/Lorentzian	1086.28	32980	6.7735	0.7372	267471
	7	Gaussian/Lorentzian	1428.79	12750.6	50.3073	1	682806			4		969.965	3287.89	35.9993	0.68886	144117			3		1232.75	3560.69	58.8124	0.882611	235023			4		972.551	3405.75	36.3089	0.6027	156137			3	Gaussian/Lorentzian	1240.94	3506.66	53.2985	0.6553	231148
	8	Gaussian/Lorentzian	1626.47	8211.44	79.4797	0.155	969317			5		1073.27	3102.76	36.6887	0.74903	134485			4		1343.46	5481.59	42.8939	0.576578	299775			5		1066.11	2715.26	23.4698	0.546	81877.7			4	Gaussian/Lorentzian	1339.18	4068.07	47.2757	0.6371	239658
	9	Gaussian/Lorentzian	1745.08	21021.8	50.9833	0.2418	1.5479e+06			6		1085.99	18076.4	6.13385	0.76566	131785			5		1441.11	3294.21	46.9978	0.4072	210305			6		1086.26	33356.8	6.77097	0.66089	279064			5	Gaussian/Lorentzian	1429.48	1830.64	71.2463	0.4839	172331
																			6		1634.41	4278.49	63.2815	0.348744	375351												6	Gaussian/Lorentzian	1625.02	4368.24	74.0207	0.3968	441171
	Peak #	Peak Type	Center X	Height	FWHH	Other	Area			Peak #	Peak Type	Center X	Height	FWHH	Other	Area			7		1740.64	4454.59	35.4808	0.458367	207892			Peak #	Peak Type	Center X	Height	FWHH	Other	Area			7	Gaussian/Lorentzian	1738.25	4602.68	52.2664	0.408	327267
	1	Gaussian/Lorentzian	280.402	10979.8	19.7872	0.2321	315393			1		0.0157572	2.22482	0.00367717	0.0224053	362.555												1		0.0418407	18.14	0.285758	0.00634795	438.647
	2	Gaussian/Lorentzian	885.641	11892.1	50.0219	0.0505	916253			2		0.00436921	50.7878	0.514941	0.126016	3431.8			Peak #	Peak Type	Center X	Height	FWHH	Other	Area			2		0.00657951	31.6775	0.25249	0.0695179	2836.7			Peak #	Peak Type	Center X	Height	FWHH	Other	Area
	3	Gaussian/Lorentzian	970.52	15516.5	40.2162	0.491	823730			3		0.108515	1.23758	1.33845	0.104185	1476.95			1		2.51164	199.122	4.26295	0.156509	15461.8			3		0.0800974	2.92077	0.294433	0.00481369	1247.86			1		1067.63	2622.7	29.7637	0.56423	99835.3
	4	Gaussian/Lorentzian	1085.99	62970.1	7.0143	0.1207	666540			4		0.232548	8.85803	1.42099	0.116585	1696.98			2		0.0150858	692.664	0.102751	0.167519	16479.9			4		0.0386638	6.74655	0.268684	0.0426581	1806.25			2		1086.27	32842.3	6.71452	0.72949	264885
	5	Gaussian/Lorentzian	1240.89	12947.3	58.5559	0.1979	1.11121e+06			5		2.49843	247.438	3.96676	0.196513	13847.9			3		0.315249	34.7804	1.19355	0.0896046	6811.16			5		0.232769	150.059	2.49309	0.0137966	3384.52			3		1240.99	3508.2	52.8782	0.63395	231404
	6	Gaussian/Lorentzian	1346.27	14612.1	57.6222	0.7755	990848			6		0.015008	730.459	0.0806752	0.192463	17527.8			4		0.212701	144.688	2.50498	0.0532822	14354.7			6		0.00272213	40.3186	0.0611266	0.0327477	1550.5			4		1339.18	4067.77	47.1352	0.60999	241527
	7	Gaussian/Lorentzian	1428.79	12750.6	50.3073	1	682806												5		1.85313	82.7046	2.14735	0.086469	2580.52												5		1429.58	1819.67	71.7025	0.48763	172150
	8	Gaussian/Lorentzian	1626.47	8211.44	79.4797	0.155	969317			percentage		1.38196e-05	0.0404096	0.0131525	0.251368	0.133003			6		0.27354	154.108	5.94754	0.13744	36779.6			percentage		2.50598e-06	0.00120871	0.00902775	0.049551	0.00555608			6		1625.05	4360.88	74.4289	0.42305	438609
	9	Gaussian/Lorentzian	1745.08	21021.8	50.9833	0.2418	1.5479e+06												7		1.16217	316.348	7.13409	0.0387622	21871.8												7		1738.23	4606.26	52.4366	0.42745	326238
										normalized intensities																		nomralized intensities
	Peak #	Peak Type	Center X	Height	FWHH	Other	Area			Peak #	Peak Type	Center X	Height	FWHH	Other	Area			precentage		1.38912e-05	0.0391355	0.016745	0.191654	0.133875			Peak #	Peak Type	Center X	Height	FWHH	Other	Area			Peak #	Peak Type	Center X	Height	FWHH	Other	Area
	1	Gaussian/Lorentzian	280.402	10979.8	19.7872	0.2321	315393			1		148.017	0.102308	15.1453	0.53165	36418.2												1		152.707	0.0557452	12.6728	0.51405	30846.8			1		0.597768	100.474	2.86251	0.00548544	5714.32
	2	Gaussian/Lorentzian	885.641	11892.1	50.0219	0.0505	916253			2		280.028	0.231549	19.3124	0.30312	114244			nomralized intensities									2		280.66	0.17205	19.7415	0.3313	158625			2		0.005728	106.772	0.0523471	0.0112442	1771.42
	3	Gaussian/Lorentzian	970.52	15516.5	40.2162	0.491	823730			3		886.053	0.138576	42.4601	0.66373	130863			Peak #	Peak Type	Center X	Height	FWHH	Other	Area			3		886.529	0.0676111	41.1448	0.49132	122296			3		0.0386353	1.1661	0.315389	0.0145533	146.923
	4	Gaussian/Lorentzian	1085.99	62970.1	7.0143	0.1207	666540			4		969.965	0.181889	35.9993	0.68886	144117			1		1074.22	0.287472	38.3408	0.823567	141839			4		972.551	0.102101	36.3089	0.6027	156137			4		0.00315595	4.13514	0.0905314	0.0181677	1303.54
	5	Gaussian/Lorentzian	1240.89	12947.3	58.5559	0.1979	1.11121e+06			5		1073.27	0.171648	36.6887	0.74903	134485			2		1085.99	1	6.13623	0.874067	123099			5		1066.11	0.0814003	23.4698	0.546	81877.7			5		0.0673724	8.22017	0.335725	0.00252311	142.026
	6	Gaussian/Lorentzian	1346.27	14612.1	57.6222	0.7755	990848			6		1085.99	1	6.13385	0.76566	131785			3		1232.75	0.0502126	58.8124	0.882611	235023			6		1086.26	1	6.77097	0.66089	279064			6		0.0240851	5.81918	0.306182	0.0176475	1641.46
	7	Gaussian/Lorentzian	1428.79	12750.6	50.3073	1	682806												4		1343.46	0.208886	42.8939	0.576578	299775												7		0.008821	2.52037	0.103959	0.0130876	760.074
	8	Gaussian/Lorentzian	1626.47	8211.44	79.4797	0.155	969317												5		1441.11	0.119401	46.9978	0.4072	210305
	9	Gaussian/Lorentzian	1745.08	21021.8	50.9833	0.2418	1.5479e+06												6		1634.41	0.222486	63.2815	0.348744	375351												percentage		5.27309e-06	0.00325106	0.00779611	0.0154138	0.00668751
																			7		1740.64	0.456712	35.4808	0.458367	207892
	Peak #	Peak Type	Center X	Height	FWHH	Other	Area																														nomralized intensities
	1		280.409	10867.1	20.2663	0.33354	308200																														Peak #	Peak Type	Center X	Height	FWHH	Other	Area
	2		885.42	11866.6	50.0627	0.21956	864709																														1		1067.63	0.0798572	29.7637	0.56423	99835.3
	3		970.377	15664.7	40.9675	0.48493	849228																														2		1086.27	1	6.71452	0.72949	264885
	4		1086	62695	7.14294	0.21584	653871																														3		1240.99	0.106819	52.8782	0.63395	231404
	5		1240.68	12787.4	58.4027	0.30387	1.0556e+06																														4		1339.18	0.123858	47.1352	0.60999	241527
	6		1346.07	14584.9	57.4394	0.66359	1.03247e+06																														5		1429.58	0.0554064	71.7025	0.48763	172150
	7		1428.75	12748.1	49.5653	0.80425	733595																														6		1625.05	0.132782	74.4289	0.42305	438609
	8		1627.03	8352.33	76.7675	0.28137	912129																														7		1738.23	0.140254	52.4366	0.42745	326238
	9		1745.06	20978.1	52.1818	0.32106	1.5363e+06
	Peak #	Peak Type	Center X	Height	FWHH	Other	Area
	1		0.00706824	114.311	0.485331	0.102654	7288.07
	2		0.221449	27.7542	0.075813	0.171317	52157.2
	3		0.145273	149.085	0.77205	0.0064447	25794.1
	4		0.0144031	288.251	0.133214	0.0994361	13437.9
	5		0.209435	162.197	0.153755	0.107661	56334.9
	6		0.204413	28.1791	0.188679	0.11309	42219.5
	7		0.0488804	3.52582	0.747647	0.198125	51404.5
	8		0.608836	152.682	2.90228	0.12774	58394.1
	9		0.0237884	47.399	1.23044	0.0804637	11669.2
	percentage		1.32626e-05	0.00459768	0.0186497	0.460693	0.0205513
	normalized intensities
	Peak #	Peak Type	Center X	Height	FWHH	Other	Area
	1		280.409	0.173333	20.2663	0.33354	308200
	2		885.42	0.189275	50.0627	0.21956	864709
	3		970.377	0.249856	40.9675	0.48493	849228
	4		1086	1	7.14294	0.21584	653871
	5		1240.68	0.203963	58.4027	0.30387	1.0556e+06
	6		1346.07	0.232633	57.4394	0.66359	1.03247e+06
	7		1428.75	0.203335	49.5653	0.80425	733595
	8		1627.03	0.133222	76.7675	0.28137	912129
	9		1745.06	0.334606	52.1818	0.32106	1.5363e+06

## Sheet: Sp. 4-6
Sp4_matrix_140-1150									Sp4_matrix_1000-1800									Sp5_matrix_140-1150 (eventuel redeconv)									Sp5_matrix_140-1150									Sp6_matrix_140-1150									Sp6_matrix_1000-1800
	Peak #	Peak Type	Center X	Height	FWHH	Other	Area			Peak #	Peak Type	Center X	Height	FWHH	Other	Area			Peak #	Peak Type	Center X	Height	FWHH	Other	Area			Peak #	Peak Type	Center X	Height	FWHH	Other	Area			Peak #	Peak Type	Center X	Height	FWHH	Other	Area			Peak #	Peak Type	Center X	Height
	1	Gaussian/Lorentzian	242.843	886.9	37.733	0.5582	43013.3			1	Gaussian/Lorentzian	1064.2	2142.45	23.9228	0.5277	66750.6			1	Gaussian/Lorentzian	156.08	7848.78	9.0196	0.5398	91793.4			1	Gaussian/Lorentzian	1086.35	99939.8	6.8854	0.5048	904810			1	Gaussian/Lorentzian	156.767	3459.38	8.6724	0.5096	39368.4			1	Gaussian/Lorentzian	1087.09	70637
	2	Gaussian/Lorentzian	283.162	2871.44	20.0646	0.5195	75249.7			2	Gaussian/Lorentzian	1086.19	13930.9	7.7293	0.5942	136705			2	Gaussian/Lorentzian	282.139	15939.6	15.5217	0.4895	326909			2	Gaussian/Lorentzian	1241.79	17716.9	68.6718	0.51	1.59319e+06			2	Gaussian/Lorentzian	283.476	11093.6	20.8416	0.3523	321535			2	Gaussian/Lorentzian	1158.11	1211.85
	3	Gaussian/Lorentzian	886.977	3283.64	48.6709	0.4074	217283			3	Gaussian/Lorentzian	1244.98	3415.29	42.2431	0.8724	162808			3	Gaussian/Lorentzian	886.76	5016.45	36.346	0.6039	230128			3	Gaussian/Lorentzian	1341.92	20803.4	74.7957	0.4951	2.04872e+06			3	Gaussian/Lorentzian	890.497	6345	68.5083	0.4414	583536			3	Gaussian/Lorentzian	1245.74	3203.55
	4	Gaussian/Lorentzian	972.325	4994.85	42.0765	0.8256	242005			4	Gaussian/Lorentzian	1342.85	4024.05	44.1473	0.806	206389			4	Gaussian/Lorentzian	971.509	6460.8	35.9209	0.7704	273636			4	Gaussian/Lorentzian	1430.3	12666.6	64.1616	0.4786	1.07714e+06			4	Gaussian/Lorentzian	969.82	8016.3	47.0187	0.6497	467269			4	Gaussian/Lorentzian	1348.52	5689.71
	5	Gaussian/Lorentzian	1064.38	2093.84	22.3629	0.6268	58621.9			5	Gaussian/Lorentzian	1431.18	3949.63	75.4353	-0.0006	465603			5	Gaussian/Lorentzian	1081.25	10228.6	40.4899	0.7463	493194			5	Gaussian/Lorentzian	1633.45	23997.2	100.967	0.4291	3.2666e+06			5	Gaussian/Lorentzian	1087.09	72285.8	7.4289	0.7188	647941			5	Gaussian/Lorentzian	1432.46	7950.72
	6	Gaussian/Lorentzian	1086.19	13937.3	7.7768	0.6251	135892			6	Gaussian/Lorentzian	1632.94	3929.43	81.6822	-0.0007	501375			6	Gaussian/Lorentzian	1086.41	90560.1	6.5596	1	632342			6	Gaussian/Lorentzian	1740.47	26740.6	58.1112	0.4258	2.10108e+06												6	Gaussian/Lorentzian	1735.41	17242.9
										7	Gaussian/Lorentzian	1738.79	5745.53	45.0212	0.9396	283185																					Peak #	Peak Type	Center X	Height	FWHH	Other	Area
	Peak #	Peak Type	Center X	Height	FWHH	Other	Area			8	Gaussian/Lorentzian	1834.08	2703.84	57.451	0.4486	208174			Peak #	Peak Type	Center X	Height	FWHH	Other	Area			Peak #	Peak Type	Center X	Height	FWHH	Other	Area			1	Gaussian/Lorentzian	156.765	3457.08	8.6637	0.5141	39234.1			Peak #	Peak Type	Center X	Height
	1	Gaussian/Lorentzian	242.076	961.666	31.0077	0.5907	37857.2												1	Gaussian/Lorentzian	156.101	8078.98	9.7091	0.5045	103098			1	Gaussian/Lorentzian	1086.35	100001	6.8736	0.4951	907207			2	Gaussian/Lorentzian	283.474	11170	20.5243	0.2987	325016			1	Gaussian/Lorentzian	1087.08	70427.7
	2	Gaussian/Lorentzian	282.987	2890.66	20.7783	0.5248	78287.1			Peak #	Peak Type	Center X	Height	FWHH	Other	Area			2	Gaussian/Lorentzian	282.117	16110.1	16.2924	0.4722	349063			2	Gaussian/Lorentzian	1241.81	17663.8	69.1548	0.5147	1.59671e+06			3	Gaussian/Lorentzian	890.612	6387.72	68.5437	0.4264	591032			2	Gaussian/Lorentzian	1157.91	1489.47
	3	Gaussian/Lorentzian	887.364	3332.36	49.6306	0.3374	230619			1	Gaussian/Lorentzian	1064.06	2127.57	23.6166	0.5246	65518.4			3	Gaussian/Lorentzian	886.403	5228.29	39.0944	0.5176	266704			3	Gaussian/Lorentzian	1341.91	20753.8	74.6658	0.4977	2.03833e+06			4	Gaussian/Lorentzian	969.854	7975.49	47.2327	0.7021	457140			3	Gaussian/Lorentzian	1246.04	3290.63
	4	Gaussian/Lorentzian	972.486	4912.91	42.8474	0.9999	224081			2	Gaussian/Lorentzian	1086.2	13963.4	7.7068	0.5681	138047			4	Gaussian/Lorentzian	971.365	6802.32	36.2214	0.5522	317318			4	Gaussian/Lorentzian	1430.19	12610.8	64.6344	0.476	1.08138e+06			5	Gaussian/Lorentzian	1087.09	72320.4	7.425	0.7143	649142			4	Gaussian/Lorentzian	1348.13	5740.29
	5	Gaussian/Lorentzian	1064.32	2121.79	23.3915	0.6999	60312.6			3	Gaussian/Lorentzian	1245	3403.04	42.0626	0.8242	164995			5	Gaussian/Lorentzian	1068.69	6540.22	25.3463	0.4987	218094			5	Gaussian/Lorentzian	1633.6	23911.3	101.947	0.4188	3.29905e+06												5	Gaussian/Lorentzian	1432.15	7948.62
	6	Gaussian/Lorentzian	1086.2	13931.4	7.7948	0.6392	135378			4	Gaussian/Lorentzian	1342.86	3993.63	44.01	0.7894	205654			6	Gaussian/Lorentzian	1086.43	100108	6.8024	0.5144	891845			6	Gaussian/Lorentzian	1740.54	26704.9	57.5912	0.414	2.08871e+06			Peak #	Peak Type	Center X	Height	FWHH	Other	Area			6	Gaussian/Lorentzian	1735.44	17272.1
										5	Gaussian/Lorentzian	1431.16	3884.35	76.411	-0.0119	465521																					1	Gaussian/Lorentzian	156.765	3455.89	8.6631	0.5158	39191.8
	Peak #	Peak Type	Center X	Height	FWHH	Other	Area			6	Gaussian/Lorentzian	1632.69	3877.41	83.3302	-0.0787	517251			Peak #	Peak Type	Center X	Height	FWHH	Other	Area			Peak #	Peak Type	Center X	Height	FWHH	Other	Area			2	Gaussian/Lorentzian	283.473	11196.5	20.4135	0.2801	326182			Peak #	Peak Type	Center X	Height
	1	Gaussian/Lorentzian	242.09	951.85	31.7699	0.6254	37862.6			7	Gaussian/Lorentzian	1738.83	5685.81	45.0409	0.9197	282909			1	Gaussian/Lorentzian	156.101	8078.2	9.7107	0.5046	103099			1	Gaussian/Lorentzian	1086.35	100055	6.8644	0.4871	909265			3	Gaussian/Lorentzian	890.65	6403.01	68.5578	0.4209	593762			1	Gaussian/Lorentzian	1087.07	70362.4
	2	Gaussian/Lorentzian	282.998	2890.12	20.7774	0.5254	78248.1			8	Gaussian/Lorentzian	1834.11	2663.29	57.6587	0.4659	204468			2	Gaussian/Lorentzian	282.117	16112.1	16.2875	0.4707	349200			2	Gaussian/Lorentzian	1241.84	17653.3	69.384	0.5198	1.59792e+06			4	Gaussian/Lorentzian	969.865	7960.79	47.309	0.7208	453497			2	Gaussian/Lorentzian	1157.86	1625.3
	3	Gaussian/Lorentzian	887.029	3288.72	48.8217	0.4054	218452												3	Gaussian/Lorentzian	886.38	5232.59	39.0402	0.5178	266539			3	Gaussian/Lorentzian	1341.87	20743.4	74.4034	0.5009	2.02769e+06			5	Gaussian/Lorentzian	1087.09	72329.4	7.4244	0.7133	649443			3	Gaussian/Lorentzian	1246.11	3312.51
	4	Gaussian/Lorentzian	972.338	4986.15	42.1984	0.8469	240052			Peak #	Peak Type	Center X	Height	FWHH	Other	Area			4	Gaussian/Lorentzian	971.367	6801.55	36.2374	0.5541	317179			4	Gaussian/Lorentzian	1430.06	12603.1	64.8762	0.4741	1.08556e+06												4	Gaussian/Lorentzian	1348.02	5748.78
	5	Gaussian/Lorentzian	1064.61	2116.45	22.8781	0.6337	60452.6			1	Gaussian/Lorentzian	1064.12	2133.77	23.8188	0.5319	66082.5			5	Gaussian/Lorentzian	1068.75	6532.22	25.4875	0.4984	219062			5	Gaussian/Lorentzian	1633.68	23871.5	102.351	0.4096	3.31776e+06			Peak #	Peak Type	Center X	Height	FWHH	Other	Area			5	Gaussian/Lorentzian	1432.06	7943.04
	6	Gaussian/Lorentzian	1086.19	13877.6	7.8083	0.6705	133377			2	Gaussian/Lorentzian	1086.2	13939.2	7.7248	0.5874	137075			6	Gaussian/Lorentzian	1086.42	100080	6.8005	0.5157	890896			6	Gaussian/Lorentzian	1740.55	26700.2	57.242	0.4027	2.08435e+06			1	Gaussian/Lorentzian	156.765	3455.03	8.6633	0.517	39165			6	Gaussian/Lorentzian	1735.45	17283.8
										3	Gaussian/Lorentzian	1244.99	3392.48	42.371	0.8719	162242																					2	Gaussian/Lorentzian	283.473	11213.9	20.3412	0.2679	326930
	Peak #	Peak Type	Center X	Height	FWHH	Other	Area			4	Gaussian/Lorentzian	1342.89	3947.21	44.3981	0.8398	200622			Peak #	Peak Type	Center X	Height	FWHH	Other	Area			Peak #	Peak Type	Center X	Height	FWHH	Other	Area			3	Gaussian/Lorentzian	890.676	6413.15	68.5666	0.4173	595576			Peak #	Peak Type	Center X	Height
	1	Gaussian/Lorentzian	242.084	949.21	32.0099	0.6476	37706.5			5	Gaussian/Lorentzian	1431.26	3931.42	74.4599	-0.1141	474046			1	Gaussian/Lorentzian	156.101	8077.08	9.7126	0.505	103088			1	Gaussian/Lorentzian	1086.37	100098	6.8573	0.4803	911057			4	Gaussian/Lorentzian	969.872	7950.99	47.3587	0.7332	451084			1	Gaussian/Lorentzian	1087.07	70310.1
	2	Gaussian/Lorentzian	283.016	2890.24	20.8058	0.5253	78362.3			6	Gaussian/Lorentzian	1633.32	3935.55	81.4439	-0.1818	529557			2	Gaussian/Lorentzian	282.118	16118.4	16.2727	0.4666	349563			2	Gaussian/Lorentzian	1241.87	17653	69.5409	0.525	1.59831e+06			5	Gaussian/Lorentzian	1087.09	72334.6	7.4242	0.7126	649641			2	Gaussian/Lorentzian	1157.89	1757.99
	3	Gaussian/Lorentzian	887.374	3334.97	49.5477	0.3436	229906			7	Gaussian/Lorentzian	1738.86	5618.93	45.1353	1	269965			3	Gaussian/Lorentzian	886.382	5242.47	38.9186	0.5182	266169			3	Gaussian/Lorentzian	1341.84	20743.4	74.1527	0.5046	2.01808e+06												3	Gaussian/Lorentzian	1246.16	3328.1
	4	Gaussian/Lorentzian	972.464	4913.94	42.8794	0.9999	224300			8	Gaussian/Lorentzian	1833.9	2685.66	57.5043	0.4596	206117			4	Gaussian/Lorentzian	971.373	6797.84	36.279	0.5596	316692			4	Gaussian/Lorentzian	1429.94	12608.4	65.0269	0.4724	1.08921e+06			Peak #	Peak Type	Center X	Height	FWHH	Other	Area			4	Gaussian/Lorentzian	1347.92	5753.52
	5	Gaussian/Lorentzian	1064.38	2129.17	23.5016	0.6937	60964.5												5	Gaussian/Lorentzian	1068.92	6547.1	25.887	0.4976	223065			5	Gaussian/Lorentzian	1633.71	23848.9	102.498	0.4011	3329773			1	Gaussian/Lorentzian	156.764	3454.44	8.6631	0.518	39142.6			5	Gaussian/Lorentzian	1431.97	7938.4
	6	Gaussian/Lorentzian	1086.2	13909.9	7.8058	0.654	134552			Peak #	Peak Type	Center X	Height	FWHH	Other	Area			6	Gaussian/Lorentzian	1086.43	99972.1	6.7956	0.5195	888004			6	Gaussian/Lorentzian	1740.54	26704.2	57.0037	0.3917	2.08442e+06			2	Gaussian/Lorentzian	283.473	11227.7	20.2834	0.2581	327522			6	Gaussian/Lorentzian	1735.46	17293.7
										1	Gaussian/Lorentzian	1064.08	2128.86	23.9121	0.5278	66293.7																					3	Gaussian/Lorentzian	890.696	6421.34	68.5732	0.4143	597046
	Peak #	Peak Type	Center X	Height	FWHH	Other	Area			2	Gaussian/Lorentzian	1086.2	13939.3	7.7179	0.5891	136862			Peak #	Peak Type	Center X	Height	FWHH	Other	Area			Peak #	Peak Type	Center X	Height	FWHH	Other	Area			4	Gaussian/Lorentzian	969.878	7943.14	47.398	0.7432	449135			Peak #	Peak Type	Center X	Height
	1	Gaussian/Lorentzian	242.084	949.197	32.0099	0.6476	37705.9			3	Gaussian/Lorentzian	1244.99	3397.34	42.0026	0.8719	161065			1	Gaussian/Lorentzian	156.101	8077.13	9.712	0.5053	103072			1	Gaussian/Lorentzian	1086.37	100137	6.8511	0.4746	912556			5	Gaussian/Lorentzian	1087.08	72340.4	7.4237	0.7121	649784			1	Gaussian/Lorentzian	1087.09	70266.8
	2	Gaussian/Lorentzian	283.015	2890.27	20.8055	0.5253	78361.9			4	Gaussian/Lorentzian	1342.75	3933.92	43.8449	0.8411	197346			2	Gaussian/Lorentzian	282.118	16122.5	16.2631	0.4639	349802			2	Gaussian/Lorentzian	1241.9	17655.3	69.6708	0.5303	1.59828e+06												2	Gaussian/Lorentzian	1157.94	1878.18
	3	Gaussian/Lorentzian	887.374	3334.99	49.5482	0.3435	229911			5	Gaussian/Lorentzian	1430.85	3915.72	75.3912	-0.1344	481030			3	Gaussian/Lorentzian	886.385	5247.09	38.8688	0.5185	266035			3	Gaussian/Lorentzian	1341.82	20745.5	73.9449	0.5085	2.00967e+06			Peak #	Peak Type	Center X	Height	FWHH	Other	Area			3	Gaussian/Lorentzian	1246.17	3338.92
	4	Gaussian/Lorentzian	972.465	4913.91	42.8797	0.9999	224296			6	Gaussian/Lorentzian	1633.77	3917.41	82.1528	-0.1863	532413			4	Gaussian/Lorentzian	971.377	6795.64	36.3015	0.5633	316332			4	Gaussian/Lorentzian	1429.84	12617.5	65.1292	0.471	1.09228e+06			1	Gaussian/Lorentzian	156.764	3453.9	8.6632	0.5188	39124.6			4	Gaussian/Lorentzian	1347.85	5756.1
	5	Gaussian/Lorentzian	1064.38	2129.39	23.5019	0.6937	60971.1			7	Gaussian/Lorentzian	1738.93	5628.96	44.7238	1	267981			5	Gaussian/Lorentzian	1069.04	6549.19	26.1638	0.4969	225569			5	Gaussian/Lorentzian	1633.72	23834.7	102.516	0.3931	3.33802e+06			2	Gaussian/Lorentzian	283.472	11239.1	20.2356	0.2501	328008			5	Gaussian/Lorentzian	1431.91	7934.92
	6	Gaussian/Lorentzian	1086.2	13910	7.8057	0.654	134550			8	Gaussian/Lorentzian	1833.58	2699.35	56.4978	0.461	203447			6	Gaussian/Lorentzian	1086.43	99902.7	6.7919	0.5221	886018			6	Gaussian/Lorentzian	1740.53	26711.7	56.8302	0.3809	2.08687e+06			3	Gaussian/Lorentzian	890.712	6428.16	68.5789	0.4118	598274			6	Gaussian/Lorentzian	1735.47	17301.8
																																					4	Gaussian/Lorentzian	969.883	7936.58	47.4306	0.7515	447511
	Peak #	Peak Type	Center X	Height	FWHH	Other	Area			Peak #	Peak Type	Center X	Height	FWHH	Other	Area			Peak #	Peak Type	Center X	Height	FWHH	Other	Area			Peak #	Peak Type	Center X	Height	FWHH	Other	Area			5	Gaussian/Lorentzian	1087.08	72344	7.4235	0.7117	649914			Peak #	Peak Type	Center X	Height
	1	Gaussian/Lorentzian	242.084	949.15	32.0097	0.6476	37703			1	Gaussian/Lorentzian	1064.07	2128.91	24.0265	0.5272	66624.7			1	Gaussian/Lorentzian	156.101	8076.88	9.7121	0.5056	103058			1	Gaussian/Lorentzian	1086.37	100170	6.8459	0.4698	913840												1	Gaussian/Lorentzian	1087.08	70238.6
	2	Gaussian/Lorentzian	283.011	2890.43	20.8034	0.5253	78358.5			2	Gaussian/Lorentzian	1086.2	13951.6	7.7067	0.5838	137073			2	Gaussian/Lorentzian	282.119	16126.6	16.2534	0.4611	350044			2	Gaussian/Lorentzian	1241.91	17658.1	69.7869	0.5355	1.59796e+06			Peak #	Peak Type	Center X	Height	FWHH	Other	Area			2	Gaussian/Lorentzian	1158	1986.75
	3	Gaussian/Lorentzian	887.371	3335.01	49.5469	0.3435	229914			3	Gaussian/Lorentzian	1245.01	3400.79	42.4906	0.8717	163115			3	Gaussian/Lorentzian	886.389	5250.77	38.834	0.5187	265957			3	Gaussian/Lorentzian	1341.79	20748	73.7754	0.5125	2002199			1	Gaussian/Lorentzian	156.764	3453.26	8.6634	0.5198	39103.7			3	Gaussian/Lorentzian	1246.17	3346.54
	4	Gaussian/Lorentzian	972.47	4913.92	42.8792	1	224289			4	Gaussian/Lorentzian	1342.99	3969.77	44.8243	0.8384	203824			4	Gaussian/Lorentzian	971.381	6793.45	36.3226	0.5671	315947			4	Gaussian/Lorentzian	1429.76	12628	65.2008	0.4698	1.09489e+06			2	Gaussian/Lorentzian	283.472	11252.4	20.18	0.2406	328571			4	Gaussian/Lorentzian	1347.79	5757.06
	5	Gaussian/Lorentzian	1064.06	2126.16	23.3707	0.6938	60535			5	Gaussian/Lorentzian	1431.5	3998.79	72.2075	-0.1153	467734			5	Gaussian/Lorentzian	1069.17	6546.27	26.4623	0.4963	228095			5	Gaussian/Lorentzian	1633.71	23824.4	102.469	0.3856	3.34421e+06			3	Gaussian/Lorentzian	890.732	6436.23	68.5849	0.4089	599724			5	Gaussian/Lorentzian	1431.85	7932.45
	6	Gaussian/Lorentzian	1086.19	13894.6	7.8561	0.6545	135242			6	Gaussian/Lorentzian	1633.22	4010.19	78.4476	-0.174	518538			6	Gaussian/Lorentzian	1086.43	99831.1	6.7876	0.5248	883872			6	Gaussian/Lorentzian	1740.51	26721.5	56.6885	0.3703	2.09049e+06			4	Gaussian/Lorentzian	969.889	7928.85	47.4685	0.7612	445596			6	Gaussian/Lorentzian	1735.48	17308.7
										7	Gaussian/Lorentzian	1738.79	5646.04	45.3537	1	272579																					5	Gaussian/Lorentzian	1087.09	72347.3	7.4235	0.7112	650075
	Peak #	Peak Type	Center X	Height	FWHH	Other	Area			8	Gaussian/Lorentzian	1833.83	2688.56	58.2326	0.463	208655			Peak #	Peak Type	Center X	Height	FWHH	Other	Area			Peak #	Peak Type	Center X	Height	FWHH	Other	Area												Peak #	Peak Type	Center X	Height
	1	Gaussian/Lorentzian	242.139	967.981	32.043	0.6477	38490.4												1	Gaussian/Lorentzian	156.075	8044.9	9.7646	0.5252	102429			1	Gaussian/Lorentzian	1086.37	100199	6.8417	0.4657	914959			Peak #	Peak Type	Center X	Height	FWHH	Other	Area			1	Gaussian/Lorentzian	1087.08	70216.3
	2	Gaussian/Lorentzian	283.83	2927.64	20.1109	0.5	77479			Peak #	Peak Type	Center X	Height	FWHH	Other	Area			2	Gaussian/Lorentzian	282.094	16350.5	15.7069	0.3108	362423			2	Gaussian/Lorentzian	1241.93	17661.1	69.8942	0.5407	1.59745e+06			1	Gaussian/Lorentzian	156.764	3452.76	8.6636	0.5206	39086.1			2	Gaussian/Lorentzian	1158.08	2076.04
	3	Gaussian/Lorentzian	887.365	3327.99	49.5423	0.3433	229419			1	Gaussian/Lorentzian	1064.16	2130.94	23.7738	0.5307	65903.3			3	Gaussian/Lorentzian	886.688	5305.49	39.537	0.5341	271980			3	Gaussian/Lorentzian	1341.78	20749.8	73.6355	0.5168	1995347			2	Gaussian/Lorentzian	283.472	11263.4	20.1337	0.2329	329030			3	Gaussian/Lorentzian	1246.17	3351.64
	4	Gaussian/Lorentzian	972.428	4896.76	42.834	1	223270			2	Gaussian/Lorentzian	1086.2	13953.6	7.7071	0.5778	137428			4	Gaussian/Lorentzian	971.76	6657.6	37.4811	0.8329	286418			4	Gaussian/Lorentzian	1429.68	12639.2	65.2535	0.4687	1.09718e+06			3	Gaussian/Lorentzian	890.747	6442.89	68.5907	0.4064	600938			4	Gaussian/Lorentzian	1347.75	5757.72
	5	Gaussian/Lorentzian	1067.25	1976.93	29.9087	0.5002	77749.2			3	Gaussian/Lorentzian	1244.97	3394.08	42.3423	0.891	160836			5	Gaussian/Lorentzian	1081.27	11017.9	39.0984	0.5578	553470			5	Gaussian/Lorentzian	1633.7	23816.2	102.394	0.3784	3.34927e+06			4	Gaussian/Lorentzian	969.893	7922.39	47.4996	0.7693	444000			5	Gaussian/Lorentzian	1431.81	7930.57
	6	Gaussian/Lorentzian	1086.26	13585.3	7.4812	0.6549	125901			4	Gaussian/Lorentzian	1342.79	3953.06	44.1612	0.8438	199497			6	Gaussian/Lorentzian	1086.42	90270.4	6.5333	1	627794			6	Gaussian/Lorentzian	1740.48	26732.7	56.5625	0.3598	2.09469e+06			5	Gaussian/Lorentzian	1087.08	72351.8	7.4231	0.7108	650194			6	Gaussian/Lorentzian	1735.49	17314.3
										5	Gaussian/Lorentzian	1431.01	3912.79	75.4302	-0.0959	475250
	Peak #	Peak Type	Center X	Height	FWHH	Other	Area			6	Gaussian/Lorentzian	1633.16	3922.58	81.9955	-0.1792	530968			Peak #	Peak Type	Center X	Height	FWHH	Other	Area			Peak #	Peak Type	Center X	Height	FWHH	Other	Area			Peak #	Peak Type	Center X	Height	FWHH	Other	Area			Peak #	Peak Type	Center X	Height
	1	Gaussian/Lorentzian	242.398	946.208	32.2199	0.6477	37830.7			7	Gaussian/Lorentzian	1738.82	5616.16	45.0241	1	269166			1	Gaussian/Lorentzian	156.075	8044.9	9.7646	0.5252	102429			1	Gaussian/Lorentzian	1086.35	100227	6.8377	0.4622	915873			1	Gaussian/Lorentzian	156.763	3452.19	8.664	0.5215	39068.7			1	Gaussian/Lorentzian	1087.08	70197.3
	2	Gaussian/Lorentzian	283.2	2898.56	20.5908	0.4999	78539			8	Gaussian/Lorentzian	1833.82	2666.16	58.4419	0.4559	208236			2	Gaussian/Lorentzian	282.094	16350.5	15.7069	0.3108	362423			2	Gaussian/Lorentzian	1241.94	17664.5	69.9938	0.5459	1.59684e+06			2	Gaussian/Lorentzian	283.472	11274.6	20.0867	0.2249	329496			2	Gaussian/Lorentzian	1158.15	2152.67
	3	Gaussian/Lorentzian	887.358	3329.01	49.5289	0.3429	229459												3	Gaussian/Lorentzian	886.687	5305.49	39.537	0.5341	271980			3	Gaussian/Lorentzian	1341.76	20751.3	73.5143	0.5211	1.9889e+06			3	Gaussian/Lorentzian	890.764	6449.78	68.5958	0.4039	602186			3	Gaussian/Lorentzian	1246.16	3355.23
	4	Gaussian/Lorentzian	972.415	4902.43	42.7401	1	223038			Peak #	Peak Type	Center X	Height	FWHH	Other	Area			4	Gaussian/Lorentzian	971.76	6657.6	37.4811	0.8329	286419			4	Gaussian/Lorentzian	1429.61	12651.3	65.2933	0.4678	1.09929e+06			4	Gaussian/Lorentzian	969.898	7915.75	47.5314	0.7776	442361			4	Gaussian/Lorentzian	1347.72	5757.76
	5	Gaussian/Lorentzian	1066.6	1970.63	29.5752	0.501	76616.8			1	Gaussian/Lorentzian	1064.02	2123.35	23.5112	0.5204	65203.4			5	Gaussian/Lorentzian	1081.27	11017.9	39.0984	0.5578	553470			5	Gaussian/Lorentzian	1633.69	23808.9	102.305	0.3716	3353581			5	Gaussian/Lorentzian	1087.09	72354.1	7.4232	0.7104	650333			5	Gaussian/Lorentzian	1431.78	7929.34
	6	Gaussian/Lorentzian	1086.24	13621.5	7.5318	0.656	127034			2	Gaussian/Lorentzian	1086.19	13978.7	7.6945	0.5594	138452			6	Gaussian/Lorentzian	1086.42	90270.4	6.5333	1	627794			6	Gaussian/Lorentzian	1740.46	26744.8	56.4468	0.3495	2.09917e+06												6	Gaussian/Lorentzian	1735.5	17319.1
										3	Gaussian/Lorentzian	1245	3414.81	41.6928	0.7616	168582																					Peak #	Peak Type	Center X	Height	FWHH	Other	Area
	Peak #	Peak Type	Center X	Height	FWHH	Other	Area			4	Gaussian/Lorentzian	1342.91	4034.72	43.7498	0.736	211274			Peak #	Peak Type	Center X	Height	FWHH	Other	Area			Peak #	Peak Type	Center X	Height	FWHH	Other	Area			1	Gaussian/Lorentzian	156.763	3451.77	8.6641	0.5222	39053.7			Peak #	Peak Type	Center X	Height
	1	Gaussian/Lorentzian	243.321	837.741	42.8517	0.5179	46845.1			5	Gaussian/Lorentzian	1431.29	3856.32	77.4444	0.0658	456850			1	Gaussian/Lorentzian	156.079	7876.88	8.931	0.506	92412			1	Gaussian/Lorentzian	1086.35	100249	6.8347	0.4592	916712			2	Gaussian/Lorentzian	283.472	11283.8	20.048	0.2183	329878			1	Gaussian/Lorentzian	1087.08	70183.4
	2	Gaussian/Lorentzian	283.282	2833.12	19.7864	0.5206	73185			6	Gaussian/Lorentzian	1632.18	3827.31	84.7237	0.0203	503127			2	Gaussian/Lorentzian	282.14	15934.7	15.5265	0.4932	326427			2	Gaussian/Lorentzian	1241.96	17668.1	70.0897	0.551	1.59617e+06			3	Gaussian/Lorentzian	890.778	6455.49	68.6007	0.4017	603232			2	Gaussian/Lorentzian	1158.23	2217.23
	3	Gaussian/Lorentzian	886.548	3229.48	47.5387	0.4788	203272			7	Gaussian/Lorentzian	1738.78	5751.63	45.0768	0.8409	296663			3	Gaussian/Lorentzian	886.524	4922.08	36.0847	0.5242	231206			3	Gaussian/Lorentzian	1341.74	20753.3	73.4092	0.5256	1.98287e+06			4	Gaussian/Lorentzian	969.903	7910.22	47.5573	0.7845	440993			3	Gaussian/Lorentzian	1246.15	3357.69
	4	Gaussian/Lorentzian	972.17	5095.7	40.8847	0.6131	262003			8	Gaussian/Lorentzian	1834.28	2660.61	56.8916	0.474	200952			4	Gaussian/Lorentzian	970.801	6546.56	33.2937	0.5601	279882			4	Gaussian/Lorentzian	1429.55	12663	65.3235	0.4669	1.10117e+06			5	Gaussian/Lorentzian	1087.09	72357.6	7.4229	0.71	650435			4	Gaussian/Lorentzian	1347.7	5757.28
	5	Gaussian/Lorentzian	1064.79	2085.99	21.6625	0.5395	58556.5												5	Gaussian/Lorentzian	1078.37	7809.83	37.692	0.5452	380042			5	Gaussian/Lorentzian	1633.67	23801.9	102.212	0.3651	3.35741e+06												5	Gaussian/Lorentzian	1431.76	7928.7
	6	Gaussian/Lorentzian	1086.17	13863.1	7.7968	0.6682	133165			Peak #	Peak Type	Center X	Height	FWHH	Other	Area			6	Gaussian/Lorentzian	1086.42	94782.6	6.5365	0.7049	751811			6	Gaussian/Lorentzian	1740.44	26757.5	56.3362	0.3393	2.10377e+06			Peak #	Peak Type	Center X	Height	FWHH	Other	Area			6	Gaussian/Lorentzian	1735.51	17323.5
										1	Gaussian/Lorentzian	1064.13	2130.53	23.7919	0.5309	65935.5																					1		156.764	3454.57	8.66439	0.51774	39153.9
	Peak #	Peak Type	Center X	Height	FWHH	Other	Area			2	Gaussian/Lorentzian	1086.2	13946.7	7.7164	0.5804	137383			Peak #	Peak Type	Center X	Height	FWHH	Other	Area			Peak #	Peak Type	Center X	Height	FWHH	Other	Area			2		283.473	11221.5	20.3088	0.26239	327217			Peak #	Peak Type	Center X	Height
	1	Gaussian/Lorentzian	242.16	952.741	31.8221	0.576	38712.7			3	Gaussian/Lorentzian	1245	3393.45	42.3551	0.8815	161543			1	Gaussian/Lorentzian	156.08	7866.46	8.9658	0.5211	92112.8			1	Gaussian/Lorentzian	1086.35	100268	6.8323	0.4567	917451			3		890.686	6418.28	68.5701	0.4153	596530			1	Gaussian/Lorentzian	1087.08	70172.5
	2	Gaussian/Lorentzian	283.018	2888.79	20.6716	0.5272	77763.5			4	Gaussian/Lorentzian	1342.82	3948.5	44.2461	0.8441	199625			2	Gaussian/Lorentzian	282.14	15939	15.5201	0.4913	326618			2	Gaussian/Lorentzian	1241.97	17671.6	70.1812	0.556	1.59545e+06			4		969.875	7946.05	47.3805	0.73931	449859			2	Gaussian/Lorentzian	1158.31	2270.07
	3	Gaussian/Lorentzian	887.37	3333.59	49.5808	0.3434	229981			5	Gaussian/Lorentzian	1431.04	3910.31	75.5219	-0.0933	475138			3	Gaussian/Lorentzian	886.593	4999.94	35.6546	0.5617	228742			3	Gaussian/Lorentzian	1341.73	20755.2	73.3229	0.5301	1.9773e+06			5		1087.09	72336.5	7.42424	0.71252	649690			3	Gaussian/Lorentzian	1246.13	3359.34
	4	Gaussian/Lorentzian	972.473	4911.35	42.9148	1	224362			6	Gaussian/Lorentzian	1633.19	3920.53	82.0937	-0.1726	530266			4	Gaussian/Lorentzian	971.169	6496.85	34.7108	0.6546	278916			4	Gaussian/Lorentzian	1429.5	12674.4	65.3431	0.4662	1.10279e+06												4	Gaussian/Lorentzian	1347.69	5756.57
	5	Gaussian/Lorentzian	1064.38	2131.66	23.4117	0.688	60944.6			7	Gaussian/Lorentzian	1738.83	5617.48	45.0445	1	269353			5	Gaussian/Lorentzian	1081.27	10668.5	37.9272	0.6529	500678			5	Gaussian/Lorentzian	1633.66	23795.1	102.12	0.359	3.36085e+06			Peak #	Peak Type	Center X	Height	FWHH	Other	Area			5	Gaussian/Lorentzian	1431.74	7928.59
	6	Gaussian/Lorentzian	1086.2	13912	7.8058	0.653	134622			8	Gaussian/Lorentzian	1833.94	2665.87	58.5166	0.4554	208518			6	Gaussian/Lorentzian	1086.42	90269.6	6.5337	1	627826			6	Gaussian/Lorentzian	1740.42	26770.7	56.2295	0.3293	2.10839e+06			1		0.00111355	2.24374	0.00269089	0.0036258	89.1148			6	Gaussian/Lorentzian	1735.51	17327.2
																																					2		0.00122066	54.2681	0.226479	0.0382225	2374.79
	Peak #	Peak Type	Center X	Height	FWHH	Other	Area			Peak #	Peak Type	Center X	Height	FWHH	Other	Area			Peak #	Peak Type	Center X	Height	FWHH	Other	Area			Peak #	Peak Type	Center X	Height	FWHH	Other	Area			3		0.0798451	31.583	0.0264708	0.0113495	5634.57			Peak #	Peak Type	Center X	Height
	1		242.328	935.264	33.5477	0.61064	39372.8			1	Gaussian/Lorentzian	1064.14	2130.97	23.8033	0.5288	66034.1			1		156.089	8007.02	9.50021	0.51423	99659.1			1		1086.36	100134	6.85241	0.47555	912373			4		0.0234062	30.3294	0.153982	0.0385293	7511.61			1		1087.08	70301.2
	2		283.152	2887.13	20.5195	0.51933	77383.4			2	Gaussian/Lorentzian	1086.2	13943.6	7.7163	0.582	137264			2		282.12	16110.4	15.9351	0.44301	345247			2		1241.89	17666.6	69.6368	0.53289	1.59683e+06			5		0.00322645	20.1706	0.00166985	0.00244164	696.574			2		1158.05	1866.56
	3		887.213	3312.98	49.1957	0.36892	224822			3	Gaussian/Lorentzian	1244.99	3395.06	42.2569	0.8645	162468			3		886.519	5175.07	38.1915	0.53488	256544			3		1341.82	20754.7	73.962	0.51129	2.00891e+06												3		1246.1	3324.42
	4		972.403	4944.19	42.5134	0.92853	231170			4	Gaussian/Lorentzian	1342.85	3953.57	44.2044	0.8312	200821			4		971.386	6681.02	36.025	0.64472	298874			4		1429.84	12636.2	65.0243	0.47115	1.09209e+06			precentage		2.96798e-06	0.000278844	0.000224919	0.00342677	0.00107216			4		1347.91	5747.48
	5		1064.92	2088.2	24.3565	0.62703	63572.5			5	Gaussian/Lorentzian	1431.11	3910.37	75.4368	-0.0885	473914			5		1074.8	8345.78	32.3653	0.55479	359474			5		1633.66	23851	102.178	0.39114	3.33165e+06												5		1431.95	7936.53
	6		1086.21	13844.3	7.74631	0.65294	132971			6	Gaussian/Lorentzian	1633.08	3910.08	82.1979	-0.1544	526623			6		1086.42	95604.7	6.66744	0.73014	770820			6		1740.49	26728.9	56.9042	0.37633	2.09419e+06			nomralized intensities									6		1735.47	17298.7
										7	Gaussian/Lorentzian	1738.85	5636.32	45.0872	0.9736	273863																					Peak #	Peak Type	Center X	Height	FWHH	Other	Area
	Peak #	Peak Type	Center X	Height	FWHH	Other	Area			8	Gaussian/Lorentzian	1833.97	2676.13	57.5421	0.461	205417			Peak #	Peak Type	Center X	Height	FWHH	Other	Area			Peak #	Peak Type	Center X	Height	FWHH	Other	Area			1		156.764	0.0477569	8.66439	0.51774	39153.9			Peak #	Peak Type	Center X	Height
	1		0.402352	38.5992	3.57482	0.0447337	2925.79												1		0.0117149	94.6322	0.34687	0.0119844	4952.73			1		0.00725879	104.1	0.016728	0.0152499	4012.67			2		283.473	0.155129	20.3088	0.26239	327217			1		0.00600083	136.42
	2		0.245974	22.3367	0.362959	0.00994204	1676.29			Peak #	Peak Type	Center X	Height	FWHH	Other	Area			2		0.0159324	143.259	0.344812	0.067015	13115.2			2		0.0595093	17.7708	0.442214	0.014813	1509.35			3		890.686	0.088728	68.5701	0.4153	596530			2		0.145328	326.642
	3		0.264606	33.4029	0.640393	0.0444936	8615.88			1	Gaussian/Lorentzian	1064.12	2130.03	23.6837	0.5277	65701.3			3		0.143795	132.459	1.4435	0.0264518	17503.6			3		0.064632	16.7156	0.497773	0.0113752	22791.4			4		969.875	0.109848	47.3805	0.73931	449859			3		0.125945	45.4133
	4		0.0944502	60.0666	0.614131	0.123478	12304.2			2	Gaussian/Lorentzian	1086.18	13956.2	7.7107	0.5764	137596			4		0.261777	130.482	1.17267	0.114258	18152.8			4		0.260752	25.0462	0.35727	0.00388491	8196.61			5		1087.09	1	7.42424	0.71252	649690			4		0.244524	19.956
	5		1.03122	59.0522	2.75202	0.0787724	6861.95			3	Gaussian/Lorentzian	1245.02	3402.98	42.1109	0.8579	162754			5		5.94599	1993.96	6.54087	0.0792343	143880			5		0.076355	59.1024	0.438141	0.0222165	28278.7												5		0.21226	7.90089
	6		0.0252935	122.559	0.121914	0.0123408	3356.19			4	Gaussian/Lorentzian	1342.84	3969.71	44.1489	0.8204	202341			6		0.00807527	4552.09	0.128422	0.226777	122371			6		0.0419266	23.0917	0.566449	0.0307104	8096.45												6		0.0313011	25.0272
										5	Gaussian/Lorentzian	1431.11	3900.44	75.9108	-0.0563	470928
	percentage		2.32861e-05	0.00885266	0.0157383	0.0189004	0.02524			6	Gaussian/Lorentzian	1632.98	3901.92	82.6428	-0.1276	524059			percentage		7.4329e-06	0.0476136	0.019261	0.310594	0.158754			percentage		6.68177e-06	0.0010396	0.00244119	0.0320679	0.00439806												nomralized intensities
										7	Gaussian/Lorentzian	1738.86	5649.98	45.0558	0.9631	275682																														Peak #	Peak Type	Center X	Height
	nomralized intensities									8	Gaussian/Lorentzian	1833.98	2664.8	58.1051	0.4631	206377			nomralized intensities									nomralized intensities																		1		1087.08	1
	Peak #	Peak Type	Center X	Height	FWHH	Other	Area												Peak #	Peak Type	Center X	Height	FWHH	Other	Area			Peak #	Peak Type	Center X	Height	FWHH	Other	Area												2		1158.05	0.0265509
	1		242.328	0.0675561	33.5477	0.61064	39372.8			Peak #	Peak Type	Center X	Height	FWHH	Other	Area			1		156.089	0.0837513	9.50021	0.51423	99659.1			1		1086.36	1	6.85241	0.47555	912373												3		1246.1	0.0472882
	2		283.152	0.208543	20.5195	0.51933	77383.4			1		1064.11	2130.74	23.7861	0.52777	66004.8			2		282.12	0.168511	15.9351	0.44301	345247			2		1241.89	0.176429	69.6368	0.53289	1.59683e+06												4		1347.91	0.0817551
	3		887.213	0.239303	49.1957	0.36892	224822			2		1086.2	13950.3	7.71305	0.57986	137389			3		886.519	0.0541298	38.1915	0.53488	256544			3		1341.82	0.207268	73.962	0.51129	2.00891e+06												5		1431.95	0.112893
	4		972.403	0.357129	42.5134	0.92853	231170			3		1244.99	3400.93	42.1928	0.85686	163041			4		971.386	0.0698817	36.025	0.64472	298874			4		1429.84	0.126193	65.0243	0.47115	1.09209e+06												6		1735.47	0.246065
	5		1064.92	0.150835	24.3565	0.62703	63572.5			4		1342.86	3972.81	44.1735	0.81902	202739			5		1074.8	0.0872947	32.3653	0.55479	359474			5		1633.66	0.23819	102.178	0.39114	3.33165e+06
	6		1086.21	1	7.74631	0.65294	132971			5		1431.15	3917.01	75.3649	-0.06445	470601			6		1086.42	1	6.66744	0.73014	770820			6		1740.49	0.26693	56.9042	0.37633	2.09419e+06
										6		1633.05	3915.24	82.071	-0.1235	521418
										7		1738.83	5659.68	45.0563	0.96369	276135
										8		1833.95	2677.43	57.6842	0.46075	206036
[truncated: 3 more columns]

## Sheet: Sp. 7 and 17
Sp7_140-1150									Sp7_1000-1800									Sp17_140-1150									Sp17_1000-1800
	Peak #	Peak Type	Center X	Height	FWHH	Other	Area			Peak #	Peak Type	Center X	Height	FWHH	Other	Area			Peak #	Peak Type	Center X	Height	FWHH	Other	Area			Peak #	Peak Type	Center X	Height	FWHH	Other	Area
	1	Gaussian/Lorentzian	206.321	10525.1	29.1701	0.4552	410775			1	Gaussian/Lorentzian	1075	3801.77	45.1033	0.9553	186352			1	Gaussian/Lorentzian	157.476	1663.29	16.87	0.5138	36748.2			1	Gaussian/Lorentzian	1067.73	2492.02	31.274	0.7676	92075.3
	2	Gaussian/Lorentzian	264.8	2878.21	58.1435	0.4531	223692			2	Gaussian/Lorentzian	1086.12	6320.23	6.7103	1	45144.6			2	Gaussian/Lorentzian	281.818	2765.95	17.8836	0.8727	55828.8			2	Gaussian/Lorentzian	1086.73	9073.23	10.1105	0.48	121757
	3	Gaussian/Lorentzian	464.747	45464.6	9.9815	0.0695	696245			3	Gaussian/Lorentzian	1234.92	3375.2	52.1951	0.5065	230875			3	Gaussian/Lorentzian	652.337	2071.29	44.1117	0.4796	121079			3	Gaussian/Lorentzian	1239.21	4764.67	81.2607	0.9348	424733
	4	Gaussian/Lorentzian	651.856	1798.28	38.1485	0.5242	89367.4			4	Gaussian/Lorentzian	1343.13	3101.65	45.4631	0.5116	184505			4	Gaussian/Lorentzian	768.578	2604.68	69.3986	0.4784	239366			4	Gaussian/Lorentzian	1336.51	5814.89	44.4345	0.5305	335950
	5	Gaussian/Lorentzian	775.778	1685.4	58.0342	0.5383	126600			5	Gaussian/Lorentzian	1437.16	1200.58	49.4552	0.5016	77968.6			5	Gaussian/Lorentzian	883.173	2836.74	63.8684	0.4802	239812			5	Gaussian/Lorentzian	1430.42	3418.13	14.4487	0.4302	66781.2
	6	Gaussian/Lorentzian	886.58	2392.96	29.8759	0.5138	93547.6			6	Gaussian/Lorentzian	1632.65	4567.47	59.4324	0.5073	355491			6	Gaussian/Lorentzian	975.573	3374.3	42.5264	1	152748			6	Gaussian/Lorentzian	1646.24	14982.1	87.9693	0.7968	1.53631e+06
	7	Gaussian/Lorentzian	973.596	2916.21	44.3137	0.557	166172			7	Gaussian/Lorentzian	1742.4	2670.34	47.1127	0.5016	165224			7	Gaussian/Lorentzian	1075.01	5009.18	72.6935	0.478	482166			7	Gaussian/Lorentzian	1741.49	18976.3	96.3275	0.3654	2.52239e+06
	8	Gaussian/Lorentzian	1074.74	3995.22	48.6445	0.5726	248331												8	Gaussian/Lorentzian	1086.57	8211.63	8.0281	0.3619	91430.4			8	Gaussian/Lorentzian	1813.72	7240.46	32.6637	0.4068	322345
	9	Gaussian/Lorentzian	1086.23	6721.94	6.5995	0.5202	57976.7			Peak #	Peak Type	Center X	Height	FWHH	Other	Area
										1	Gaussian/Lorentzian	1074.98	3780.61	45.6044	0.9581	187136			Peak #	Peak Type	Center X	Height	FWHH	Other	Area			Peak #	Peak Type	Center X	Height	FWHH	Other	Area
	Peak #	Peak Type	Center X	Height	FWHH	Other	Area			2	Gaussian/Lorentzian	1086.19	6325.58	6.7208	1	45253.6			1	Gaussian/Lorentzian	157.543	1645.58	17.2691	0.513	37227.2			1	Gaussian/Lorentzian	1068.47	2515.51	32.6738	0.8062	95506.2
	1	Gaussian/Lorentzian	206.278	10503	29.0411	0.4581	407683			3	Gaussian/Lorentzian	1234.77	3357.89	52.9646	0.5103	232739			2	Gaussian/Lorentzian	281.819	2766	17.8768	0.8719	55828.6			2	Gaussian/Lorentzian	1086.68	8982.97	9.911	0.4736	118456
	2	Gaussian/Lorentzian	264.525	2856.33	59.8226	0.4541	228311			4	Gaussian/Lorentzian	1343.12	3140.78	44.3558	0.5162	181981			3	Gaussian/Lorentzian	652.307	2088	43.2097	0.478	119640			3	Gaussian/Lorentzian	1238.99	4740.98	81.8553	0.9999	413103
	3	Gaussian/Lorentzian	464.751	45488.1	9.966	0.0641	696790			5	Gaussian/Lorentzian	1437.51	1209.33	49.2398	0.5024	78176.9			4	Gaussian/Lorentzian	768.601	2585.36	70.523	0.4771	241547			4	Gaussian/Lorentzian	1336.51	5841.11	44.6124	0.5337	338395
	4	Gaussian/Lorentzian	651.881	1804.29	37.8676	0.5309	88784.2			6	Gaussian/Lorentzian	1632.69	4524.54	60.8141	0.5133	359517			5	Gaussian/Lorentzian	883.258	2817.51	64.5189	0.4782	240787			5	Gaussian/Lorentzian	1430.42	3426.56	14.4036	0.4189	67019.8
	5	Gaussian/Lorentzian	776.053	1669.84	59.5086	0.5489	128091			7	Gaussian/Lorentzian	1742.4	2697.59	45.9562	0.5027	162761			6	Gaussian/Lorentzian	975.606	3372.87	42.3373	1	152004			6	Gaussian/Lorentzian	1645.99	14782.6	87.4135	0.8148	1.4947e+06
	6	Gaussian/Lorentzian	886.612	2416.54	29.3197	0.5152	92667.2												7	Gaussian/Lorentzian	1075	5004.84	72.7255	0.4756	482399			7	Gaussian/Lorentzian	1741.33	19068.6	97.5535	0.3303	2599421
	7	Gaussian/Lorentzian	973.611	2913.12	44.677	0.5703	166493			Peak #	Peak Type	Center X	Height	FWHH	Other	Area			8	Gaussian/Lorentzian	1086.54	8215.55	8.0319	0.3616	91528.5			8	Gaussian/Lorentzian	1813.68	7103.11	31.8229	0.4022	308622
	8	Gaussian/Lorentzian	1074.8	3997.05	48.8464	0.5924	247557			1	Gaussian/Lorentzian	1074.47	3629.45	47.1903	0.9548	186189
	9	Gaussian/Lorentzian	1086.22	6705.69	6.5926	0.5275	57614.8			2	Gaussian/Lorentzian	1086.2	6620.46	6.6585	0.6385	54978.3			Peak #	Peak Type	Center X	Height	FWHH	Other	Area			Peak #	Peak Type	Center X	Height	FWHH	Other	Area
										3	Gaussian/Lorentzian	1234.36	3256.62	61.6081	1	213570			1	Gaussian/Lorentzian	157.577	1636.61	17.4759	0.5126	37473.2			1	Gaussian/Lorentzian	1073.04	3445.59	47.6825	1	174889
	Peak #	Peak Type	Center X	Height	FWHH	Other	Area			4	Gaussian/Lorentzian	1342.32	3288.32	45.4516	0.9769	160822			2	Gaussian/Lorentzian	281.819	2766.04	17.8732	0.8715	55829			2	Gaussian/Lorentzian	1086.66	8312.45	8.368	0.3863	95625.2
	1	Gaussian/Lorentzian	206.259	10492.3	28.9901	0.4601	406243			5	Gaussian/Lorentzian	1437.47	1400.65	54.705	0.5227	99813.2			3	Gaussian/Lorentzian	652.292	2096.98	42.7437	0.4771	118898			3	Gaussian/Lorentzian	1237.12	5304.88	91.8687	0.9168	538976
	2	Gaussian/Lorentzian	264.393	2848.12	60.547	0.4553	230308			6	Gaussian/Lorentzian	1632.7	4369.4	67.1849	0.985	314666			4	Gaussian/Lorentzian	768.609	2576.18	71.0712	0.4764	242616			4	Gaussian/Lorentzian	1337.34	6225.36	47.7165	0.4476	398599
	3	Gaussian/Lorentzian	464.747	45493.2	9.9625	0.0628	696910			7	Gaussian/Lorentzian	1741.55	3003.91	43.6785	0.5648	168240			5	Gaussian/Lorentzian	883.302	2808.45	64.8197	0.4772	241223			5	Gaussian/Lorentzian	1429.76	3386.57	21.7167	0.2117	107529
	4	Gaussian/Lorentzian	651.887	1806.43	37.793	0.5351	88573.3												6	Gaussian/Lorentzian	975.621	3372.11	42.2472	1	151647			6	Gaussian/Lorentzian	1645.93	14380.9	88.1508	0.617	1.59147e+06
	5	Gaussian/Lorentzian	776.154	1663.66	60.1171	0.5556	128590			Peak #	Peak Type	Center X	Height	FWHH	Other	Area			7	Gaussian/Lorentzian	1074.99	5003.19	72.737	0.4743	482551			7	Gaussian/Lorentzian	1741.33	19473.7	104.336	0.0576	3114541
	6	Gaussian/Lorentzian	886.622	2422.5	29.2285	0.516	92579.3			1	Gaussian/Lorentzian	1074.47	3629.45	47.1903	0.9548	186189			8	Gaussian/Lorentzian	1086.54	8216.15	8.0347	0.3614	91574.7			8	Gaussian/Lorentzian	1813.44	6606.02	28.7696	0.3142	267964
	7	Gaussian/Lorentzian	973.628	2913.43	44.8144	0.5786	166487			2	Gaussian/Lorentzian	1086.2	6620.46	6.6585	0.6385	54978.3
	8	Gaussian/Lorentzian	1074.83	3998.82	48.959	0.6047	247043			3	Gaussian/Lorentzian	1234.36	3256.62	61.6081	1	213570			Peak #	Peak Type	Center X	Height	FWHH	Other	Area			Peak #	Peak Type	Center X	Height	FWHH	Other	Area
	9	Gaussian/Lorentzian	1086.22	6697.25	6.5878	0.5321	57398.9			4	Gaussian/Lorentzian	1342.32	3288.32	45.4516	0.9769	160821			1	Gaussian/Lorentzian	158.29	1450.1	22.3504	0.4519	43452.1			1	Gaussian/Lorentzian	1073.09	3582.74	47.7169	1	181978
										5	Gaussian/Lorentzian	1437.47	1400.65	54.705	0.5227	99813.2			2	Gaussian/Lorentzian	281.861	2787.82	17.419	0.7635	57487.4			2	Gaussian/Lorentzian	1086.67	8193.35	8.4397	0.4999	91091.2
	Peak #	Peak Type	Center X	Height	FWHH	Other	Area			6	Gaussian/Lorentzian	1632.7	4369.4	67.1849	0.985	314666			3	Gaussian/Lorentzian	651.718	2145.7	34.8194	0.474	99282.4			3	Gaussian/Lorentzian	1237.1	5409.82	91.9054	0.9166	549897
	1	Gaussian/Lorentzian	206.251	10487.5	28.97	0.4613	405609			7	Gaussian/Lorentzian	1741.55	3003.9	43.6785	0.5648	168239			4	Gaussian/Lorentzian	769.388	2413.08	84.2513	0.2346	293813			4	Gaussian/Lorentzian	1337.42	6406.97	47.832	0.4472	411281
	2	Gaussian/Lorentzian	264.335	2844.92	60.8532	0.456	231149												5	Gaussian/Lorentzian	884.611	2657.16	60.0597	0.3741	219815			5	Gaussian/Lorentzian	1429.81	3740.25	21.8668	0.2114	119592
	3	Gaussian/Lorentzian	464.751	45494.8	9.9615	0.0625	696942			Peak #	Peak Type	Center X	Height	FWHH	Other	Area			6	Gaussian/Lorentzian	975.42	3268.26	40.462	0.8715	149298			6	Gaussian/Lorentzian	1644.13	15687.4	88.6429	0.6142	1.74766e+06
	4	Gaussian/Lorentzian	651.891	1807.28	37.7719	0.5372	88492.9			1	Gaussian/Lorentzian	1074.34	3609.22	46.9157	0.9134	187578			7	Gaussian/Lorentzian	1074.94	5025.68	70.1093	0.2493	507015			7	Gaussian/Lorentzian	1742.23	19220	104.336	0.4961	2.6369e+06
	5	Gaussian/Lorentzian	776.196	1661.26	60.3642	0.559	128761			2	Gaussian/Lorentzian	1086.2	6673.56	6.6419	0.5985	56179			8	Gaussian/Lorentzian	1086.61	8276.99	7.9443	0.3089	92963.2			8	Gaussian/Lorentzian	1814.65	7352.49	29.3225	0.4996	283839
	6	Gaussian/Lorentzian	886.627	2424.52	29.213	0.5164	92594.1			3	Gaussian/Lorentzian	1234.35	3257.04	60.9673	0.9646	214875
	7	Gaussian/Lorentzian	973.638	2913.82	44.8754	0.5828	166464			4	Gaussian/Lorentzian	1342.48	3291.69	45.3375	0.9141	165274			Peak #	Peak Type	Center X	Height	FWHH	Other	Area			Peak #	Peak Type	Center X	Height	FWHH	Other	Area
	8	Gaussian/Lorentzian	1074.84	3999.68	49.0169	0.6109	246779			5	Gaussian/Lorentzian	1437.92	1425.02	51.145	0.5446	94160.2			1	Gaussian/Lorentzian	158.239	1458.46	22.1801	0.4264	43784.2			1	Gaussian/Lorentzian	1073.09	3582.73	47.7169	1	181978
	9	Gaussian/Lorentzian	1086.22	6693.06	6.5855	0.5344	57290.3			6	Gaussian/Lorentzian	1632.71	4367.69	67.2486	1	312659			2	Gaussian/Lorentzian	281.871	2799.16	17.3384	0.7238	58423.4			2	Gaussian/Lorentzian	1086.67	8193.3	8.4397	0.4999	91090.7
										7	Gaussian/Lorentzian	1741.65	3010.21	43.7268	0.5688	168517			3	Gaussian/Lorentzian	651.863	2186.5	35.7167	0.4589	104362			3	Gaussian/Lorentzian	1237.1	5409.82	91.9054	0.9166	549898
	Peak #	Peak Type	Center X	Height	FWHH	Other	Area												4	Gaussian/Lorentzian	769.45	2429.2	82.9247	0.3668	277871			4	Gaussian/Lorentzian	1337.42	6407.01	47.832	0.4472	411283
	1	Gaussian/Lorentzian	206.241	10481.2	28.9473	0.4629	404801			Peak #	Peak Type	Center X	Height	FWHH	Other	Area			5	Gaussian/Lorentzian	884.584	2702.73	63.0022	0.4378	229075			5	Gaussian/Lorentzian	1429.81	3740.25	21.8668	0.2114	119592
	2	Gaussian/Lorentzian	264.266	2841.03	61.2394	0.4572	232200			1	Gaussian/Lorentzian	1074.52	3634.59	47.1602	0.9549	186326			6	Gaussian/Lorentzian	975.552	3303.38	41.2322	1	144988			6	Gaussian/Lorentzian	1644.13	15687.4	88.6429	0.6142	1747662
	3	Gaussian/Lorentzian	464.751	45496.2	9.9606	0.0622	696975			2	Gaussian/Lorentzian	1086.2	6621.55	6.6315	0.637	54798.3			7	Gaussian/Lorentzian	1075.07	5085.45	71.2764	0.3452	504179			7	Gaussian/Lorentzian	1742.23	19220	104.336	0.4961	2.6369e+06
	4	Gaussian/Lorentzian	651.894	1808.31	37.755	0.5403	88399.8			3	Gaussian/Lorentzian	1234.33	3256.79	61.5831	1	213496			8	Gaussian/Lorentzian	1086.57	8087.75	8.144	0.4557	88232.5			8	Gaussian/Lorentzian	1814.65	7352.49	29.3225	0.4996	283839
	5	Gaussian/Lorentzian	776.251	1658.46	60.6671	0.564	128939			4	Gaussian/Lorentzian	1342.33	3289.35	45.4691	0.9731	161218
	6	Gaussian/Lorentzian	886.632	2426.83	29.2104	0.517	92654			5	Gaussian/Lorentzian	1437.6	1402.42	54.5089	0.5272	99408.8			Peak #	Peak Type	Center X	Height	FWHH	Other	Area			Peak #	Peak Type	Center X	Height	FWHH	Other	Area
	7	Gaussian/Lorentzian	973.652	2914.5	44.9585	0.5888	166419			6	Gaussian/Lorentzian	1632.74	4374.8	67.0411	0.9868	314123			1	Gaussian/Lorentzian	158.02	1490.7	21.0309	0.3612	43467.4			1	Gaussian/Lorentzian	1073.09	3582.72	47.7169	1	181977
	8	Gaussian/Lorentzian	1074.86	4000.9	49.1008	0.6199	246400			7	Gaussian/Lorentzian	1741.68	3010.96	43.5182	0.5633	168116			2	Gaussian/Lorentzian	281.895	2815.13	17.0439	0.6498	59551.9			2	Gaussian/Lorentzian	1086.67	8193.24	8.4397	0.4999	91090
	9	Gaussian/Lorentzian	1086.22	6687.07	6.5824	0.5378	57135.8												3	Gaussian/Lorentzian	651.685	2136.28	34.6142	0.4768	98159			3	Gaussian/Lorentzian	1237.1	5409.83	91.9054	0.9166	549899
										Peak #	Peak Type	Center X	Height	FWHH	Other	Area			4	Gaussian/Lorentzian	769.329	2411.07	84.4301	0.2024	297450			4	Gaussian/Lorentzian	1337.42	6407.03	47.832	0.4472	411285
	Peak #	Peak Type	Center X	Height	FWHH	Other	Area			1	Gaussian/Lorentzian	1074.52	3634.56	47.1602	0.9549	186324			5	Gaussian/Lorentzian	884.76	2653.95	60.0136	0.3638	220203			5	Gaussian/Lorentzian	1429.81	3740.24	21.8668	0.2114	119592
	1	Gaussian/Lorentzian	206.233	10476.3	28.9319	0.4643	404185			2	Gaussian/Lorentzian	1086.2	6621.7	6.6315	0.637	54799.5			6	Gaussian/Lorentzian	975.414	3246.38	40.434	0.9221	144858			6	Gaussian/Lorentzian	1644.13	15687.4	88.6429	0.6142	1747662
	2	Gaussian/Lorentzian	264.211	2838.44	61.5215	0.4582	232964			3	Gaussian/Lorentzian	1234.33	3256.79	61.5831	1	213496			7	Gaussian/Lorentzian	1074.97	5064.27	69.9671	0.2299	513307			7	Gaussian/Lorentzian	1742.23	19220	104.336	0.4961	2.6369e+06
	3	Gaussian/Lorentzian	464.751	45497	9.9601	0.062	696994			4	Gaussian/Lorentzian	1342.33	3289.35	45.4691	0.9731	161218			8	Gaussian/Lorentzian	1086.58	8196.12	8.0335	0.3731	90953.3			8	Gaussian/Lorentzian	1814.65	7352.49	29.3225	0.4996	283839
	4	Gaussian/Lorentzian	651.897	1809.12	37.7485	0.5429	88334.7			5	Gaussian/Lorentzian	1437.6	1402.43	54.5089	0.5272	99409.2
	5	Gaussian/Lorentzian	776.294	1656.61	60.8825	0.5682	129040			6	Gaussian/Lorentzian	1632.74	4374.8	67.0411	0.9868	314123			Peak #	Peak Type	Center X	Height	FWHH	Other	Area			Peak #	Peak Type	Center X	Height	FWHH	Other	Area
	6	Gaussian/Lorentzian	886.636	2428.48	29.2195	0.5175	92728.6			7	Gaussian/Lorentzian	1741.68	3010.96	43.5182	0.5633	168116			1		157.857	1557.46	19.5294	0.46315	40358.7			1		1071.42	3200.22	42.4635	0.928967	151401
	7	Gaussian/Lorentzian	973.664	2915.18	45.0262	0.5939	166373												2		281.847	2783.35	17.5725	0.7922	57158.2			2		1086.68	8491.42	8.95143	0.473267	101518
	8	Gaussian/Lorentzian	1074.87	4001.98	49.1723	0.6275	246077			Peak #	Peak Type	Center X	Height	FWHH	Other	Area			3		652.034	2120.79	39.2026	0.474067	110237			3		1237.77	5173.33	88.4502	0.93355	504418
	9	Gaussian/Lorentzian	1086.22	6681.89	6.5798	0.5408	57003.6			1	Gaussian/Lorentzian	1074.52	3634.31	47.1583	0.9537	186406			4		768.992	2503.26	77.0998	0.372617	265444			4		1337.1	6183.73	46.7099	0.475567	384465
										2	Gaussian/Lorentzian	1086.2	6622.02	6.6315	0.6364	54815.7			5		883.948	2746.09	62.7137	0.435217	231819			5		1430.01	3575.33	19.3616	0.2825	100018
	Peak #	Peak Type	Center X	Height	FWHH	Other	Area			3	Gaussian/Lorentzian	1234.33	3257.9	61.5579	1	213481			6		975.531	3322.88	41.5399	0.9656	149257			6		1645.1	15201.3	88.2437	0.678533	1.64424e+06
	1	Gaussian/Lorentzian	206.228	10473.1	28.9227	0.4653	403780			4	Gaussian/Lorentzian	1342.32	3291.88	45.3653	0.9763	160737			7		1075	5032.1	71.5848	0.375383	495269			7		1741.81	19196.4	101.871	0.3736	2.69118e+06
	2	Gaussian/Lorentzian	264.174	2836.93	61.6995	0.459	233445			5	Gaussian/Lorentzian	1437.48	1401.09	54.7287	0.5244	99823.9			8		1086.57	8200.7	8.03608	0.370433	91113.8			8		1814.13	7167.84	30.204	0.437	291741
	3	Gaussian/Lorentzian	464.746	45497.2	9.96	0.0619	697008			6	Gaussian/Lorentzian	1632.72	4372.35	67.1057	0.9871	314204
	4	Gaussian/Lorentzian	651.9	1809.66	37.7479	0.5448	88296.3			7	Gaussian/Lorentzian	1741.66	3007.24	43.6269	0.5644	168256			Peak #	Peak Type	Center X	Height	FWHH	Other	Area			Peak #	Peak Type	Center X	Height	FWHH	Other	Area
	5	Gaussian/Lorentzian	776.327	1655.56	61.015	0.5713	129086												1		0.337179	92.2065	2.36773	0.0568135	3218.06			1		2.35579	494.896	7.42828	0.101072	40825.3
	6	Gaussian/Lorentzian	886.639	2429.5	29.2311	0.5178	92792.4			Peak #	Peak Type	Center X	Height	FWHH	Other	Area			2		0.0302347	19.0761	0.325982	0.0865071	1457.23			2		0.021641	382.708	0.751688	0.0402837	13275.6
	7	Gaussian/Lorentzian	973.673	2915.7	45.0725	0.5975	166338			1	Gaussian/Lorentzian	1074.52	3634.29	47.1583	0.9537	186405			3		0.28396	39.3078	4.18555	0.00698562	9843.7			3		0.941633	299.728	4.87653	0.0304038	60673.7
	8	Gaussian/Lorentzian	1074.88	4002.69	49.2228	0.6329	245848			2	Gaussian/Lorentzian	1086.2	6622.17	6.6315	0.6364	54816.9			4		0.398144	86.0804	6.80335	0.116142	25019.7			4		0.42219	259.717	1.54745	0.039986	33748
	9	Gaussian/Lorentzian	1086.22	6678.33	6.578	0.5429	56912			3	Gaussian/Lorentzian	1234.33	3257.9	61.5579	1	213481			5		0.706806	76.9036	1.97673	0.0491188	9303.29			5		0.294978	165.362	3.49029	0.100498	23802.7
										4	Gaussian/Lorentzian	1342.32	3291.88	45.3653	0.9763	160737			6		0.0836062	52.8891	0.874535	0.0507945	3240.92			6		0.965973	517.259	0.456662	0.0901464	107150
	Peak #	Peak Type	Center X	Height	FWHH	Other	Area			5	Gaussian/Lorentzian	1437.48	1401.08	54.7287	0.5244	99823.5			7		0.0403474	31.6941	1.20742	0.106717	13177.1			7		0.428856	154.559	3.50416	0.156427	193641
	1	Gaussian/Lorentzian	206.223	10469.7	28.9142	0.4665	403359			6	Gaussian/Lorentzian	1632.72	4372.36	67.1057	0.9871	314204			8		0.0241983	56.5341	0.0579655	0.0433903	1427.86			8		0.527247	266.893	1.47533	0.0694733	18139.4
	2	Gaussian/Lorentzian	264.139	2835.43	61.8836	0.4599	233938			7	Gaussian/Lorentzian	1741.66	3007.25	43.6269	0.5644	168257
	3	Gaussian/Lorentzian	464.746	45497.5	9.9599	0.0619	697019												percentage		2.22703e-05	0.00689382	0.00721316	0.117134	0.0156712			percentage		0.000290633	0.0372348	0.0488456	0.158978	0.0621764
	4	Gaussian/Lorentzian	651.902	1810.18	37.7507	0.5469	88256.3
	5	Gaussian/Lorentzian	776.34	1654.56	61.1486	0.5747	129119												nomralized intensities									nomralized intensities
	6	Gaussian/Lorentzian	886.641	2430.62	29.2477	0.5182	92874.1												Peak #	Peak Type	Center X	Height	FWHH	Other	Area			Peak #	Peak Type	Center X	Height	FWHH	Other	Area
	7	Gaussian/Lorentzian	973.683	2916.33	45.1244	0.6016	166298												1		157.857	0.189918	19.5294	0.46315	40358.7			1		1071.42	0.376876	42.4635	0.928967	151401
	8	Gaussian/Lorentzian	1074.9	4003.45	49.2798	0.6389	245583												2		281.847	0.339404	17.5725	0.7922	57158.2			2		1086.68	1	8.95143	0.473267	101518
	9	Gaussian/Lorentzian	1086.22	6674.47	6.576	0.5452	56809												3		652.034	0.258611	39.2026	0.474067	110237			3		1237.77	0.609242	88.4502	0.93355	504418
																			4		768.992	0.30525	77.0998	0.372617	265444			4		1337.1	0.728232	46.7099	0.475567	384465
	Peak #	Peak Type	Center X	Height	FWHH	Other	Area			Peak #	Peak Type	Center X	Height	FWHH	Other	Area			5		883.948	0.334861	62.7137	0.435217	231819			5		1430.01	0.421052	19.3616	0.2825	100018
	1		206.254	10488.5	28.9859	0.461713	405804			1		1074.59	3665.36	46.7379	0.9504	186545			6		975.531	0.405195	41.5399	0.9656	149257			6		1645.1	1.79019	88.2437	0.678533	1.64424e+06
	2		264.355	2847.42	60.7138	0.4566	230751			2		1086.19	6560.86	6.65733	0.713589	52862.7			7		1075	0.613619	71.5848	0.375383	495269			7		1741.81	2.26068	101.871	0.3736	2.69118e+06
	3		464.749	45491.1	9.96401	0.0633625	696860			3		1234.45	3281.42	59.5139	0.886822	217732			8		1086.57	1	8.03608	0.370433	91113.8			8		1814.13	0.844127	30.204	0.437	291741
	4		651.889	1806.69	37.8229	0.537787	88563.1			4		1342.52	3252.58	45.3032	0.866056	166368
	5		776.174	1663.17	60.2172	0.56	128528			5		1437.52	1360.36	53.0806	0.521911	94266.4
	6		886.624	2421.49	29.3182	0.516487	92804.7			6		1632.71	4410.31	65.5732	0.882044	323739
	7		973.643	2914.78	44.8578	0.583813	166380			7		1741.8	2935.82	44.2714	0.5509	167303
	8		1074.84	3999.97	49.0303	0.612475	246702
	9		1086.22	6692.46	6.5852	0.535112	57267.6
	Peak #	Peak Type	Center X	Height	FWHH	Other	Area
	1		0.0303016	17.1737	0.0796776	0.00357297	2295.97
	2		0.205196	13.272	1.1574	0.00223942	3173.23
	3		0.00227761	10.4109	0.00687685	0.00241761	242.422
	4		0.0138654	3.64754	0.128692	0.00710887	343.688
	5		0.174512	9.61621	0.9649	0.0114099	795.248
	6		0.0187546	11.5848	0.213326	0.00137244	295.682
	7		0.0285151	1.17483	0.246627	0.0139645	102.945
	8		0.0475419	2.66656	0.1976	0.0207735	863.91
	9		0.00333307	14.7131	0.00741266	0.00784131	364.862
	percentage		3.0685e-06	0.00219846	0.00112565	0.0146536	0.00637117
	nomralized intensities
	Peak #	Peak Type	Center X	Height	FWHH	Other	Area
	1		206.254	1.56721	28.9859	0.461713	405804
	2		264.355	0.425468	60.7138	0.4566	230751
	3		464.749	6.79736	9.96401	0.0633625	696860
	4		651.889	0.26996	37.8229	0.537787	88563.1
	5		776.174	0.248514	60.2172	0.56	128528
	6		886.624	0.361824	29.3182	0.516487	92804.7
	7		973.643	0.435533	44.8578	0.583813	166380
	8		1074.84	0.597683	49.0303	0.612475	246702
	9		1086.22	1	6.5852	0.535112	57267.6

## Sheet: Sp. 8-16
Sp8_micrite_140-1150									Sp8_micrite_1000-1800									Sp9_micrite_140-1150									Sp9_micrite_1000-1800									Sp10_outer lamina_140-1150									Sp10_outer lamina_1000-1800
	Peak #	Peak Type	Center X	Height	FWHH	Other	Area			Peak #	Peak Type	Center X	Height	FWHH	Other	Area			Peak #	Peak Type	Center X	Height	FWHH	Other	Area			Peak #	Peak Type	Center X	Height	FWHH	Other	Area			Peak #	Peak Type	Center X	Height	FWHH	Other	Area			Peak #	Peak Type	Center X	Height
	1	Gaussian/Lorentzian	144.111	6605.42	17.8149	0.5038	154647			1	Gaussian/Lorentzian	1074.37	9090.48	36.8967	0.5728	429071			1	Gaussian/Lorentzian	154.918	3962.68	6.0872	0.5054	31709.4			1	Gaussian/Lorentzian	1068.39	8950.24	25.9136	0.7282	278538			1	Gaussian/Lorentzian	259.053	2113.7	48.8419	0.5917	130880			1	Gaussian/Lorentzian	1075.12	7263.96
	2	Gaussian/Lorentzian	253.455	3913.66	49.6816	0.5134	254083			2	Gaussian/Lorentzian	1086.07	75440.1	6.2895	0.5234	619431			2	Gaussian/Lorentzian	255.25	3482.31	87.949	0.5384	396319			2	Gaussian/Lorentzian	1085.81	82762	6.5181	0.5707	691236			2	Gaussian/Lorentzian	281.379	7279.53	15.0898	0.527	143101			2	Gaussian/Lorentzian	1086.39	38724.2
	3	Gaussian/Lorentzian	281.34	13235.8	16.088	0.5048	279769			3	Gaussian/Lorentzian	1239.17	9631.03	54.0933	0.53	677268			3	Gaussian/Lorentzian	280.651	13978.9	15.4859	0.4991	285165			3	Gaussian/Lorentzian	1627.56	14342.2	54.3361	1	829538			3	Gaussian/Lorentzian	882.776	5543.42	41.2077	0.568	292430			3	Gaussian/Lorentzian	1239.79	7051.01
	4	Gaussian/Lorentzian	883.02	7609.8	30.4295	0.5315	300866			4	Gaussian/Lorentzian	1336.53	9464.9	46.8555	0.4495	594589			4	Gaussian/Lorentzian	884.857	8123.05	35.9861	0.5163	382240			4	Gaussian/Lorentzian	1737.8	9568.06	34.9424	0.641	415971			4	Gaussian/Lorentzian	971.811	8288.24	39.0068	0.9686	349214			4	Gaussian/Lorentzian	1336.15	7772.24
	5	Gaussian/Lorentzian	971.191	11231.9	37.7253	0.588	538324			5	Gaussian/Lorentzian	1432.74	10723.5	27.2704	0.509	383610			5	Gaussian/Lorentzian	972.358	11315.9	39.5529	0.5511	577341												5	Gaussian/Lorentzian	1074.68	6773.17	38.0151	0.8125	298205			5	Gaussian/Lorentzian	1435.05	3951.81
	6	Gaussian/Lorentzian	1074.43	7819.89	28.5381	0.5338	289724			6	Gaussian/Lorentzian	1627.22	19484.6	96.9753	0.2712	2.69585e+06			6	Gaussian/Lorentzian	1070.95	11142.7	39.551	0.5876	560399			Peak #	Peak Type	Center X	Height	FWHH	Other	Area			6	Gaussian/Lorentzian	1086.4	39089.5	6.1415	0.5917	305076			6	Gaussian/Lorentzian	1551.84	6941.26
	7	Gaussian/Lorentzian	1086.09	76109	6.3319	0.5113	631978			7	Gaussian/Lorentzian	1739.79	18588.4	55.9541	0.5997	1.31575e+06			7	Gaussian/Lorentzian	1085.82	81210.3	6.2958	0.5266	666632			1	Gaussian/Lorentzian	1070.2	8944.49	30.0838	0.7225	323865												7	Gaussian/Lorentzian	1626.4	10296.9
																												2	Gaussian/Lorentzian	1085.82	81290.1	6.4048	0.6048	658173			Peak #	Peak Type	Center X	Height	FWHH	Other	Area			8	Gaussian/Lorentzian	1741.1	8405.93
	Peak #	Peak Type	Center X	Height	FWHH	Other	Area			Peak #	Peak Type	Center X	Height	FWHH	Other	Area			Peak #	Peak Type	Center X	Height	FWHH	Other	Area			3	Gaussian/Lorentzian	1627.49	14396.1	53.709	0.9463	843697			1	Gaussian/Lorentzian	259.054	2140.44	47.7213	0.5985	129152
	1	Gaussian/Lorentzian	144.075	6594.29	17.9843	0.5061	155712			1	Gaussian/Lorentzian	1074.47	9113.87	37.1208	0.5808	431435			1	Gaussian/Lorentzian	154.957	3985.17	6.3018	0.509	32967.6			4	Gaussian/Lorentzian	1737.73	9333.88	36.2004	0.6297	422286			2	Gaussian/Lorentzian	281.404	7295.99	15.0961	0.5294	143348			Peak #	Peak Type	Center X	Height
	2	Gaussian/Lorentzian	252.716	3895.09	48.8936	0.5177	248451			2	Gaussian/Lorentzian	1086.08	75353.5	6.2862	0.5274	617456			2	Gaussian/Lorentzian	255.138	3703.14	81.2012	0.5648	385174												3	Gaussian/Lorentzian	882.83	5554.25	41.3991	0.5717	293924			1	Gaussian/Lorentzian	1075.7	7490.12
	3	Gaussian/Lorentzian	281.32	13323.4	16.2567	0.5065	284387			3	Gaussian/Lorentzian	1239.2	9631.85	54.0194	0.5316	675990			3	Gaussian/Lorentzian	280.741	13950.4	15.3625	0.4997	282240			Peak #	Peak Type	Center X	Height	FWHH	Other	Area			4	Gaussian/Lorentzian	971.847	8282.08	39.2016	1	345604			2	Gaussian/Lorentzian	1086.39	38200.7
	4	Gaussian/Lorentzian	882.946	7756.35	29.4416	0.537	296083			4	Gaussian/Lorentzian	1336.52	9486.65	46.6271	0.4439	594298			4	Gaussian/Lorentzian	884.911	8086.76	36.5302	0.5199	385697			1	Gaussian/Lorentzian	1070.45	8976.32	30.6879	0.7544	327137			5	Gaussian/Lorentzian	1074.83	6822.36	38.3763	0.8416	299411			3	Gaussian/Lorentzian	1239.68	7042.49
	5	Gaussian/Lorentzian	971.201	11220.2	37.9804	0.6107	536528			5	Gaussian/Lorentzian	1432.81	10806.8	26.7039	0.5098	378452			5	Gaussian/Lorentzian	972.41	11300.4	39.8491	0.572	576078			2	Gaussian/Lorentzian	1085.82	81087.2	6.3868	0.6103	653257			6	Gaussian/Lorentzian	1086.39	38977.2	6.134	0.6051	302213			4	Gaussian/Lorentzian	1336.11	7883.59
	6	Gaussian/Lorentzian	1074.55	7864.6	28.913	0.5469	293703			6	Gaussian/Lorentzian	1627.32	19505.9	97.0961	0.2551	2.71729e+06			6	Gaussian/Lorentzian	1071.4	11233.9	40.4959	0.638	566902			3	Gaussian/Lorentzian	1627.53	14364.4	54.1016	1	827252												5	Gaussian/Lorentzian	1435.15	3956.18
	7	Gaussian/Lorentzian	1086.09	75981.3	6.3251	0.5167	628916			7	Gaussian/Lorentzian	1739.82	18534.1	55.8374	0.6117	1.30296e+06			7	Gaussian/Lorentzian	1085.83	80829.5	6.2716	0.5418	657055			4	Gaussian/Lorentzian	1737.61	9347.32	36.6923	0.6473	425607			Peak #	Peak Type	Center X	Height	FWHH	Other	Area			6	Gaussian/Lorentzian	1551.84	6934.58
																																					1	Gaussian/Lorentzian	259.71	2457.66	53.8554	0.5564	170120			7	Gaussian/Lorentzian	1626.38	10283.2
	Peak #	Peak Type	Center X	Height	FWHH	Other	Area			Peak #	Peak Type	Center X	Height	FWHH	Other	Area			Peak #	Peak Type	Center X	Height	FWHH	Other	Area			Peak #	Peak Type	Center X	Height	FWHH	Other	Area			2	Gaussian/Lorentzian	281.467	7185.16	15.0469	0.5164	141435			8	Gaussian/Lorentzian	1741.08	8430.61
	1	Gaussian/Lorentzian	144.057	6588.67	18.0882	0.5084	156337			1	Gaussian/Lorentzian	1074.52	9122.41	37.2305	0.5886	431773			1	Gaussian/Lorentzian	154.959	4002.07	6.3251	0.5101	33214.8			1	Gaussian/Lorentzian	1072.03	11906.6	44.9686	0.3487	744321			3	Gaussian/Lorentzian	882.685	5779.9	44.1805	0.4842	337595
	2	Gaussian/Lorentzian	252.153	3888.01	48.1	0.5218	243597			2	Gaussian/Lorentzian	1086.06	75313	6.2841	0.5312	615991			2	Gaussian/Lorentzian	255.217	3765.14	79.477	0.5729	382103			2	Gaussian/Lorentzian	1085.81	79698.5	6.2652	0.6306	624750			4	Gaussian/Lorentzian	971.989	8500.59	40.0662	0.9777	366339			Peak #	Peak Type	Center X	Height
	3	Gaussian/Lorentzian	281.304	13395.3	16.3921	0.508	288127			3	Gaussian/Lorentzian	1239.2	9629.48	53.9813	0.5331	674958			3	Gaussian/Lorentzian	280.767	13939.8	15.3235	0.5	281269			3	Gaussian/Lorentzian	1626.49	16978.3	64.5222	0.1388	1.63533e+06			5	Gaussian/Lorentzian	1075.56	7280.84	40.4608	0.888	330068			1	Gaussian/Lorentzian	1075.71	7488.45
	4	Gaussian/Lorentzian	882.934	7808.84	29.1788	0.5418	294879			4	Gaussian/Lorentzian	1336.49	9498.68	46.4622	0.4383	594200			4	Gaussian/Lorentzian	884.931	8092.6	36.5569	0.5211	386072			4	Gaussian/Lorentzian	1739.35	10964.2	43.4916	0.5306	619578			6	Gaussian/Lorentzian	1086.39	38467	6.1099	0.6683	289578			2	Gaussian/Lorentzian	1086.38	38201.4
	5	Gaussian/Lorentzian	971.219	11209.7	38.1674	0.6323	534033			5	Gaussian/Lorentzian	1432.83	10820.9	26.5054	0.5104	376045			5	Gaussian/Lorentzian	972.43	11304.4	39.9104	0.5785	575675																					3	Gaussian/Lorentzian	1239.68	7042.48
	6	Gaussian/Lorentzian	1074.66	7893.89	29.2522	0.56	296726			6	Gaussian/Lorentzian	1627.41	19534.2	97.071	0.2401	2734708			6	Gaussian/Lorentzian	1071.48	11263.1	40.6876	0.6545	567250			Peak #	Peak Type	Center X	Height	FWHH	Other	Area			Peak #	Peak Type	Center X	Height	FWHH	Other	Area			4	Gaussian/Lorentzian	1336.11	7884.24
	7	Gaussian/Lorentzian	1086.08	75879.9	6.3184	0.5221	626103			7	Gaussian/Lorentzian	1739.84	18482.7	55.788	0.6233	1.29219e+06			7	Gaussian/Lorentzian	1085.82	80736.9	6.2679	0.5475	654452			1	Gaussian/Lorentzian	1072.09	11970	44.7999	0.3409	747590			1	Gaussian/Lorentzian	259.611	2457.05	53.5959	0.5582	169136			5	Gaussian/Lorentzian	1435.15	3956.06
																												2	Gaussian/Lorentzian	1085.82	79674.1	6.2587	0.6357	622616			2	Gaussian/Lorentzian	281.468	7194.1	15.0854	0.5168	141950			6	Gaussian/Lorentzian	1551.84	6934.72
	Peak #	Peak Type	Center X	Height	FWHH	Other	Area			Peak #	Peak Type	Center X	Height	FWHH	Other	Area			Peak #	Peak Type	Center X	Height	FWHH	Other	Area			3	Gaussian/Lorentzian	1626.52	16965.8	64.6823	0.1275	1.64439e+06			3	Gaussian/Lorentzian	882.722	5788.24	44.3328	0.4809	339662			7	Gaussian/Lorentzian	1626.38	10283.1
	1	Gaussian/Lorentzian	144.046	6585.72	18.1638	0.5108	156772			1	Gaussian/Lorentzian	1074.57	9143.81	37.3089	0.5964	432356			1	Gaussian/Lorentzian	155.018	4079.51	6.6424	0.5253	35346.9			4	Gaussian/Lorentzian	1739.37	10982.3	43.1007	0.5361	613730			4	Gaussian/Lorentzian	972.024	8494.99	40.1904	1	363434			8	Gaussian/Lorentzian	1741.08	8430.79
	2	Gaussian/Lorentzian	251.672	3887.75	47.2738	0.5259	239028			2	Gaussian/Lorentzian	1086.06	75259.7	6.283	0.535	614550			2	Gaussian/Lorentzian	254.321	4106.44	67.0394	0.6651	338916												5	Gaussian/Lorentzian	1075.63	7314.91	40.6653	0.9093	330123
	3	Gaussian/Lorentzian	281.29	13461.2	16.512	0.5094	291495			3	Gaussian/Lorentzian	1239.19	9625.9	53.958	0.5346	674032			3	Gaussian/Lorentzian	280.962	14051	15.5167	0.5031	286717			Peak #	Peak Type	Center X	Height	FWHH	Other	Area			6	Gaussian/Lorentzian	1086.38	38402.2	6.1057	0.679	287628			Peak #	Peak Type	Center X	Height
	4	Gaussian/Lorentzian	882.946	7828.72	29.1677	0.5464	294977			4	Gaussian/Lorentzian	1336.47	9508.78	46.3127	0.4327	594169			4	Gaussian/Lorentzian	885.091	8113.34	37.3486	0.5345	393299			1	Gaussian/Lorentzian	1072.21	12062.9	44.635	0.3089	759244												1	Gaussian/Lorentzian	1075.7	7312.33
	5	Gaussian/Lorentzian	971.244	11199.3	38.3311	0.6543	531093			5	Gaussian/Lorentzian	1432.83	10819.7	26.3955	0.511	374356			5	Gaussian/Lorentzian	972.656	11326.9	40.9926	0.6554	574412			2	Gaussian/Lorentzian	1085.81	79456.9	6.2764	0.6564	617465			Peak #	Peak Type	Center X	Height	FWHH	Other	Area			2	Gaussian/Lorentzian	1086.37	38220.1
	6	Gaussian/Lorentzian	1074.77	7955.74	29.5861	0.5739	300804			6	Gaussian/Lorentzian	1627.49	19566.7	96.9734	0.2257	2750056			6	Gaussian/Lorentzian	1072.8	11744.7	43.1846	0.8717	572457			3	Gaussian/Lorentzian	1626.54	16949.3	64.8781	0.0807	1.67333e+06			1	Gaussian/Lorentzian	258.497	2438.42	51.3567	0.5847	159193			3	Gaussian/Lorentzian	1243.61	5054.87
	7	Gaussian/Lorentzian	1086.09	75740.1	6.313	0.5278	623051			7	Gaussian/Lorentzian	1739.85	18435	55.7612	0.6347	1.28234e+06			7	Gaussian/Lorentzian	1085.82	79315.8	6.2222	0.6279	618160			4	Gaussian/Lorentzian	1739.43	10930.8	42.7053	0.5617	599276			2	Gaussian/Lorentzian	281.48	7298.94	15.4526	0.5204	147307			4	Gaussian/Lorentzian	1336.13	7037.95
																																					3	Gaussian/Lorentzian	882.715	5789.11	44.2648	0.4767	339702			5	Gaussian/Lorentzian	1435.15	3471.94
	Peak #	Peak Type	Center X	Height	FWHH	Other	Area			Peak #	Peak Type	Center X	Height	FWHH	Other	Area			Peak #	Peak Type	Center X	Height	FWHH	Other	Area			Peak #	Peak Type	Center X	Height	FWHH	Other	Area			4	Gaussian/Lorentzian	972.01	8487.55	40.1358	0.9999	362624			6	Gaussian/Lorentzian	1551.83	5266.86
	1	Gaussian/Lorentzian	144.04	6584.04	18.2237	0.5133	157096			1	Gaussian/Lorentzian	1074.62	9166.14	37.3784	0.6043	432865			1	Gaussian/Lorentzian	155.026	4091.54	6.7079	0.5343	35675.1			1	Gaussian/Lorentzian	1072.18	12019.1	44.7563	0.3229	754740			5	Gaussian/Lorentzian	1075.47	7254.39	40.4388	0.8804	329807			7	Gaussian/Lorentzian	1624.55	9208.79
	2	Gaussian/Lorentzian	251.248	3891.94	46.4378	0.5298	234698			2	Gaussian/Lorentzian	1086.06	75207.3	6.2819	0.5387	613127			2	Gaussian/Lorentzian	254.085	4107.46	66.9761	0.7065	333011			2	Gaussian/Lorentzian	1085.81	79519	6.2718	0.6488	619398			6	Gaussian/Lorentzian	1086.39	38533.8	6.1106	0.6585	291279			8	Gaussian/Lorentzian	1733.68	6292.68
	3	Gaussian/Lorentzian	281.276	13522.9	16.6214	0.5108	294604			3	Gaussian/Lorentzian	1239.18	9621.91	53.9424	0.5361	673175			3	Gaussian/Lorentzian	280.983	14060.9	15.5564	0.5006	287928			3	Gaussian/Lorentzian	1626.49	17058.1	63.924	0.0844	1.65732e+06
	4	Gaussian/Lorentzian	882.965	7837.07	29.2487	0.5511	295572			4	Gaussian/Lorentzian	1336.45	9518.66	46.168	0.4269	594193			4	Gaussian/Lorentzian	885.134	8137.8	37.6656	0.5401	396967			4	Gaussian/Lorentzian	1739.36	10994	42.5838	0.5415	605746			Peak #	Peak Type	Center X	Height	FWHH	Other	Area			Peak #	Peak Type	Center X	Height
	5	Gaussian/Lorentzian	971.268	11189.8	38.4865	0.6766	527983			5	Gaussian/Lorentzian	1432.84	10815	26.3106	0.5117	372890			5	Gaussian/Lorentzian	972.833	11352	41.6792	0.6898	577157												1	Gaussian/Lorentzian	258.022	2409.15	50.8395	0.5317	158933			1	Gaussian/Lorentzian	1076.15	7779.87
	6	Gaussian/Lorentzian	1074.87	8004.4	29.9159	0.5887	304236			6	Gaussian/Lorentzian	1627.57	19601	96.844	0.2119	2.76429e+06			6	Gaussian/Lorentzian	1073.43	12018.9	44.2877	1	566612			Peak #	Peak Type	Center X	Height	FWHH	Other	Area			2	Gaussian/Lorentzian	281.453	7358.85	15.5483	0.5076	150176			2	Gaussian/Lorentzian	1086.37	37727.6
	7	Gaussian/Lorentzian	1086.09	75618.3	6.3073	0.5337	620062			7	Gaussian/Lorentzian	1739.86	18389.3	55.7462	0.6461	1.27297e+06			7	Gaussian/Lorentzian	1085.81	78553.5	6.2097	0.6789	598428			1	Gaussian/Lorentzian	1072.23	12047.1	44.6838	0.3166	757007			3	Gaussian/Lorentzian	882.729	5784.83	44.3833	0.4835	339472			3	Gaussian/Lorentzian	1239.57	7026.62
																												2	Gaussian/Lorentzian	1085.81	79477.4	6.2723	0.6526	618169			4	Gaussian/Lorentzian	972.013	8493.48	40.2022	1	363472			4	Gaussian/Lorentzian	1336	8121.34
	Peak #	Peak Type	Center X	Height	FWHH	Other	Area			Peak #	Peak Type	Center X	Height	FWHH	Other	Area			Peak #	Peak Type	Center X	Height	FWHH	Other	Area			3	Gaussian/Lorentzian	1626.51	16972.4	64.5942	0.0771	1.67027e+06			5	Gaussian/Lorentzian	1075.65	7316.03	40.6041	0.9063	330111			5	Gaussian/Lorentzian	1435.35	3846.56
	1	Gaussian/Lorentzian	144.035	6583.09	18.273	0.5157	157351			1	Gaussian/Lorentzian	1074.66	9188.08	37.4446	0.6121	433317			1	Gaussian/Lorentzian	155.026	4091.54	6.7079	0.5343	35675.1			4	Gaussian/Lorentzian	1739.44	10932.8	42.721	0.5468	603094			6	Gaussian/Lorentzian	1086.38	38400.1	6.1055	0.677	287833			6	Gaussian/Lorentzian	1551.92	6778.21
	2	Gaussian/Lorentzian	250.886	3898.55	45.6496	0.5335	230780			2	Gaussian/Lorentzian	1086.06	75155.8	6.2809	0.5423	611746			2	Gaussian/Lorentzian	254.085	4107.46	66.9761	0.7065	333011																					7	Gaussian/Lorentzian	1626.01	10299.2
	3	Gaussian/Lorentzian	281.263	13578	16.7181	0.5121	297373			3	Gaussian/Lorentzian	1239.18	9617.84	53.9311	0.5375	672373			3	Gaussian/Lorentzian	280.983	14060.9	15.5564	0.5006	287928			Peak #	Peak Type	Center X	Height	FWHH	Other	Area			Peak #	Peak Type	Center X	Height	FWHH	Other	Area			8	Gaussian/Lorentzian	1741.29	8386.64
	4	Gaussian/Lorentzian	882.986	7841.39	29.357	0.5554	296317			4	Gaussian/Lorentzian	1336.43	9528.53	46.0276	0.4212	594260			4	Gaussian/Lorentzian	885.135	8137.81	37.6656	0.5401	396966			1	Gaussian/Lorentzian	1072.24	12066.9	44.6609	0.3128	758881			1	Gaussian/Lorentzian	257.92	2403.01	50.6521	0.5249	158352
	5	Gaussian/Lorentzian	971.291	11181.4	38.6315	0.6979	524959			5	Gaussian/Lorentzian	1432.85	10809.5	26.2366	0.5125	371538			5	Gaussian/Lorentzian	972.833	11352	41.6792	0.6898	577157			2	Gaussian/Lorentzian	1085.82	79442.7	6.2739	0.6548	617522			2	Gaussian/Lorentzian	281.451	7373.7	15.5659	0.503	150913			Peak #	Peak Type	Center X	Height
	6	Gaussian/Lorentzian	1074.97	8035.92	30.2255	0.6033	306801			6	Gaussian/Lorentzian	1627.65	19635.4	96.7052	0.1986	2777702			6	Gaussian/Lorentzian	1073.43	12018.9	44.2877	1	566612			3	Gaussian/Lorentzian	1626.52	16962.4	64.6838	0.0731	1.67375e+06			3	Gaussian/Lorentzian	882.614	5766.06	43.8998	0.4876	334180			1	Gaussian/Lorentzian	1076.35	7836.33
	7	Gaussian/Lorentzian	1086.07	75523.5	6.3012	0.5394	617299			7	Gaussian/Lorentzian	1739.87	18345.5	55.7358	0.6573	1.26397e+06			7	Gaussian/Lorentzian	1085.81	78553.5	6.2097	0.6789	598428			4	Gaussian/Lorentzian	1739.45	10923.8	42.7003	0.5502	601519			4	Gaussian/Lorentzian	971.932	8512.89	39.828	0.9365	371665			2	Gaussian/Lorentzian	1086.38	37532.1
																																					5	Gaussian/Lorentzian	1075.45	7226.65	40.0886	0.8543	329474			3	Gaussian/Lorentzian	1239.51	7020.76
	Peak #	Peak Type	Center X	Height	FWHH	Other	Area			Peak #	Peak Type	Center X	Height	FWHH	Other	Area			Peak #	Peak Type	Center X	Height	FWHH	Other	Area			Peak #	Peak Type	Center X	Height	FWHH	Other	Area			6	Gaussian/Lorentzian	1086.38	38583	6.1133	0.6529	292442			4	Gaussian/Lorentzian	1335.97	8191
	1	Gaussian/Lorentzian	144.032	6582.41	18.3186	0.5181	157574			1	Gaussian/Lorentzian	1074.87	9306.96	37.8033	0.6558	435390			1	Gaussian/Lorentzian	155.034	4103.03	6.774	0.5452	35975.4			1	Gaussian/Lorentzian	1072.26	12080.7	44.6393	0.3084	760585												5	Gaussian/Lorentzian	1435.38	3841.55
	2	Gaussian/Lorentzian	250.549	3907.14	44.8643	0.5372	226992			2	Gaussian/Lorentzian	1086.08	74880.4	6.2774	0.5611	604692			2	Gaussian/Lorentzian	254.466	4124.45	67.4004	0.7543	329894			2	Gaussian/Lorentzian	1085.82	79418.9	6.275	0.6573	616816			Peak #	Peak Type	Center X	Height	FWHH	Other	Area			6	Gaussian/Lorentzian	1551.9	6812.47
	3	Gaussian/Lorentzian	281.249	13630.8	16.8107	0.5133	300033			3	Gaussian/Lorentzian	1239.13	9594.72	53.902	0.5452	668382			3	Gaussian/Lorentzian	280.972	14006.1	15.4718	0.4962	285725			3	Gaussian/Lorentzian	1626.52	16957.9	64.7308	0.0686	1677026			1	Gaussian/Lorentzian	257.854	2401.6	50.57	0.5288	157772			7	Gaussian/Lorentzian	1626.06	10279.9
	4	Gaussian/Lorentzian	883.008	7844.42	29.479	0.5598	297144			4	Gaussian/Lorentzian	1336.33	9586.38	45.2514	0.3887	594880			4	Gaussian/Lorentzian	884.903	8213.3	35.7193	0.5244	382286			4	Gaussian/Lorentzian	1739.46	10915.4	42.6804	0.5543	599816			2	Gaussian/Lorentzian	281.45	7378.83	15.5902	0.503	151256			8	Gaussian/Lorentzian	1741.3	8419.64
	5	Gaussian/Lorentzian	971.316	11172.4	38.7766	0.7196	521793			5	Gaussian/Lorentzian	1432.87	10777.5	25.8847	0.5173	364804			5	Gaussian/Lorentzian	972.451	11419.6	39.4747	0.5838	573879												3	Gaussian/Lorentzian	882.72	5789.1	44.3308	0.4788	339920
	6	Gaussian/Lorentzian	1075.07	8103.98	30.5359	0.6188	310646			6	Gaussian/Lorentzian	1628.04	19817.7	95.9251	0.1301	2.84562e+06			6	Gaussian/Lorentzian	1073.02	12109.1	41.4298	0.701	609166			Peak #	Peak Type	Center X	Height	FWHH	Other	Area			4	Gaussian/Lorentzian	972.028	8495.06	40.2016	1	363538			Peak #	Peak Type	Center X	Height
	7	Gaussian/Lorentzian	1086.09	75381	6.2966	0.5455	614230			7	Gaussian/Lorentzian	1739.94	18116.6	55.7188	0.7169	1.21767e+06			7	Gaussian/Lorentzian	1085.82	78971.3	6.2608	0.6801	606259			1		1071.43	11102.4	39.9829	0.44643	621191			5	Gaussian/Lorentzian	1075.66	7325.24	40.7095	0.9146	330155			1		1075.79	7528.51
																												2		1085.81	80182.7	6.3203	0.6322	633940			6	Gaussian/Lorentzian	1086.39	38367.7	6.1081	0.6832	286984			2		1086.38	38101
	Peak #	Peak Type	Center X	Height	FWHH	Other	Area			Peak #	Peak Type	Center X	Height	FWHH	Other	Area			Peak #	Peak Type	Center X	Height	FWHH	Other	Area			3		1626.81	16194.7	61.4162	0.35965	1.41319e+06												3		1240.31	6706.37
	1	Gaussian/Lorentzian	144.03	6581.84	18.3605	0.5205	157770			1	Gaussian/Lorentzian	1074.92	9318.59	37.8543	0.6634	435180			1	Gaussian/Lorentzian	155.047	4127.02	6.8864	0.564	36515.8			4		1738.9	10489.3	40.7818	0.57392	550662			Peak #	Peak Type	Center X	Height	FWHH	Other	Area			4		1336.08	7815.06
	2	Gaussian/Lorentzian	250.247	3916.56	44.1252	0.5407	223493			2	Gaussian/Lorentzian	1086.06	74848.4	6.2751	0.5642	603478			2	Gaussian/Lorentzian	255.559	4171.52	69.6239	0.8367	332756												1	Gaussian/Lorentzian	255.673	2275.7	51.6017	0.5325	152333			5		1435.21	3837.35
	3	Gaussian/Lorentzian	281.235	13679.1	16.896	0.5145	302483			3	Gaussian/Lorentzian	1239.12	9591.73	53.8932	0.5465	667724			3	Gaussian/Lorentzian	280.957	13855.3	15.1676	0.493	277444			Peak #	Peak Type	Center X	Height	FWHH	Other	Area			2	Gaussian/Lorentzian	281.401	7470.96	16.2106	0.5097	158821			6		1551.86	6611.35
	4	Gaussian/Lorentzian	883.031	7847.05	29.6034	0.564	297996			4	Gaussian/Lorentzian	1336.31	9596.58	45.1301	0.383	595165			4	Gaussian/Lorentzian	885.182	8065.07	38.253	0.5373	399999			1		1.25125	1405.38	7.35178	0.189494	204242			3	Gaussian/Lorentzian	882.817	5787.18	44.3249	0.4935	337905			7		1625.96	10108.5
	5	Gaussian/Lorentzian	971.339	11164.6	38.9164	0.7407	518722			5	Gaussian/Lorentzian	1432.87	10773.2	25.831	0.5185	363725			5	Gaussian/Lorentzian	972.826	11384.6	41.3904	0.672	579049			2		0.00686222	1085.63	0.0826477	0.0272866	23979.6			4	Gaussian/Lorentzian	972.083	8499.78	40.0945	1	362766			8		1739.92	8061.05
	6	Gaussian/Lorentzian	1075.17	8137.14	30.8322	0.6343	312979			6	Gaussian/Lorentzian	1628.1	19845.5	95.8221	0.1201	2855979			6	Gaussian/Lorentzian	1073.73	12233.1	44.3862	1	577993			3		0.463951	1196.53	4.83098	0.408308	379731			5	Gaussian/Lorentzian	1076.3	7289.52	41.0761	0.8837	336119
	7	Gaussian/Lorentzian	1086.07	75288.7	6.2911	0.5514	611513			7	Gaussian/Lorentzian	1739.95	18081.7	55.7165	0.7269	1.21022e+06			7	Gaussian/Lorentzian	1085.81	78083.4	6.2218	0.7216	585527			4		0.778171	705.204	3.20195	0.0438021	84933.5			6	Gaussian/Lorentzian	1086.38	38308.3	6.0677	0.6595	287429			Peak #	Peak Type	Center X	Height
																																														1		0.389501	215.15
	Peak #	Peak Type	Center X	Height	FWHH	Other	Area			Peak #	Peak Type	Center X	Height	FWHH	Other	Area			Peak #	Peak Type	Center X	Height	FWHH	Other	Area			precentage		6.31989e-06	0.0135395	0.0130765	0.0431613	0.0378264			Peak #	Peak Type	Center X	Height	FWHH	Other	Area			2		0.00682316	384.217
	1	Gaussian/Lorentzian	144.028	6581.31	18.4002	0.523	157948			1	Gaussian/Lorentzian	1074.95	9347.85	37.91	0.6709	435851			1	Gaussian/Lorentzian	155.051	4128.74	6.915	0.5683	36621.3												1	Gaussian/Lorentzian	259.549	2459.69	53.3759	0.5571	168695			3		1.48051	738.646
	2	Gaussian/Lorentzian	249.97	3926.71	43.4202	0.544	220209			2	Gaussian/Lorentzian	1086.08	74788.7	6.275	0.5672	602270			2	Gaussian/Lorentzian	255.874	4186.37	69.9555	0.8566	332633			nomralized intensities									2	Gaussian/Lorentzian	281.505	7200.14	15.101	0.5149	142316			4		0.067087	376.465
	3	Gaussian/Lorentzian	281.221	13723.9	16.9761	0.5156	304779			3	Gaussian/Lorentzian	1239.11	9588.15	53.8875	0.5478	667074			3	Gaussian/Lorentzian	280.955	13814.4	15.0875	0.494	275062			Peak #	Peak Type	Center X	Height	FWHH	Other	Area			3	Gaussian/Lorentzian	882.732	5786.8	44.3072	0.4822	339214			5		0.116255	170.754
	4	Gaussian/Lorentzian	883.054	7849.48	29.7289	0.5682	298860			4	Gaussian/Lorentzian	1336.29	9606.57	45.0104	0.3772	595454			4	Gaussian/Lorentzian	884.95	7998.35	37.1478	0.5164	388354			1		1071.43	0.138464	39.9829	0.44643	621191			4	Gaussian/Lorentzian	972.022	8491.53	40.1271	1	362709			6		0.0357103	604.682
	5	Gaussian/Lorentzian	971.36	11156.8	39.0532	0.7615	515647			5	Gaussian/Lorentzian	1432.87	10768.1	25.7834	0.5199	362701			5	Gaussian/Lorentzian	972.373	11324.4	39.3181	0.5425	576086			2		1085.81	1	6.3203	0.6322	633940			5	Gaussian/Lorentzian	1075.31	7169.67	40.4356	0.8848	325294			7		0.652108	402.428
	6	Gaussian/Lorentzian	1075.26	8188.94	31.1204	0.6501	315883			6	Gaussian/Lorentzian	1628.16	19872	95.724	0.1105	2.86595e+06			6	Gaussian/Lorentzian	1073.2	12268.7	40.8126	0.5883	636315			3		1626.81	0.201972	61.4162	0.35965	1.41319e+06			6	Gaussian/Lorentzian	1086.38	38688.6	6.105	0.6307	295499			8		2.79268	790.988
	7	Gaussian/Lorentzian	1086.07	75173.1	6.2862	0.5575	608663			7	Gaussian/Lorentzian	1739.96	18047.5	55.7188	0.7367	1.20303e+06			7	Gaussian/Lorentzian	1085.82	78721.7	6.2865	0.715	598098			4		1738.9	0.130817	40.7818	0.57392	550662
																																					Peak #	Peak Type	Center X	Height	FWHH	Other	Area			percentage		6.28065e-06	0.0100842
	Peak #	Peak Type	Center X	Height	FWHH	Other	Area			Peak #	Peak Type	Center X	Height	FWHH	Other	Area			Peak #	Peak Type	Center X	Height	FWHH	Other	Area												1		258.494	2355.64	51.241	0.55645	155457
	1	Gaussian/Lorentzian	144.025	6580.8	18.4385	0.5254	158114			1	Gaussian/Lorentzian	1074.98	9364.6	37.9661	0.6783	435943			1	Gaussian/Lorentzian	155.053	4132.31	6.9293	0.5704	36697.7												2		281.446	7303.62	15.3787	0.51482	147062			nomralized intensities
	2	Gaussian/Lorentzian	249.716	3937.26	42.7523	0.5473	217133			2	Gaussian/Lorentzian	1086.08	74749	6.2743	0.5701	601192			2	Gaussian/Lorentzian	256.01	4194.56	70.1569	0.8666	332775												3		882.734	5736.89	43.6631	0.50071	329400			Peak #	Peak Type	Center X	Height
	3	Gaussian/Lorentzian	281.206	13765.3	17.0515	0.5166	306929			3	Gaussian/Lorentzian	1239.11	9584.86	53.8831	0.5491	666466			3	Gaussian/Lorentzian	280.953	13794.7	15.0556	0.4946	274021												4		971.976	8454.62	39.9054	0.98827	361136			1		1075.79	0.197593
	4	Gaussian/Lorentzian	883.079	7851.76	29.8561	0.5722	299743			4	Gaussian/Lorentzian	1336.28	9616.76	44.8914	0.3714	595762			4	Gaussian/Lorentzian	884.908	8068.5	36.6148	0.5191	385756												5		1075.45	7177.28	40.087	0.87755	323877			2		1086.38	1
	5	Gaussian/Lorentzian	971.383	11149.2	39.1877	0.782	512592			5	Gaussian/Lorentzian	1432.88	10763.1	25.739	0.5212	361716			5	Gaussian/Lorentzian	972.396	11312.3	39.6793	0.5553	577869												6		1086.39	38581.7	6.11013	0.65059	292596			3		1240.31	0.176016
	6	Gaussian/Lorentzian	1075.35	8239.55	31.4002	0.6663	318596			6	Gaussian/Lorentzian	1628.21	19897.8	95.6309	0.1013	2.87558e+06			6	Gaussian/Lorentzian	1073.25	12259.6	41.1761	0.6262	631915																					4		1336.08	0.205114
	7	Gaussian/Lorentzian	1086.07	75061.2	6.2819	0.5635	605889			7	Gaussian/Lorentzian	1739.97	18014.1	55.7225	0.7464	1.19602e+06			7	Gaussian/Lorentzian	1085.83	78668.9	6.2783	0.7135	597294												Peak #	Peak Type	Center X	Height	FWHH	Other	Area			5		1435.21	0.100715
																																					1		1.15695	125.228	1.90221	0.0259969	13867			6		1551.86	0.173522
	Peak #	Peak Type	Center X	Height	FWHH	Other	Area			Peak #	Peak Type	Center X	Height	FWHH	Other	Area			Peak #	Peak Type	Center X	Height	FWHH	Other	Area												2		0.0373224	88.8914	0.352508	0.0086963	5387.54			7		1625.96	0.265308
	1		144.048	6586.76	18.2066	0.51451	156932			1		1074.69	9216.28	37.4914	0.62234	433318			1		155.009	4070.36	6.6277	0.53663	35039.9												3		0.0594979	94.2868	1.1877	0.0348593	18186.8			8		1739.92	0.211571
	2		251.261	3906.27	46.1198	0.53113	233846			2		1086.07	75099.6	6.28074	0.54606	610393			2		255.001	3994.89	72.6755	0.70684	349659												4		0.0818956	84.9826	0.415898	0.020346	7383.35
	3		281.27	13531.6	16.6323	0.51116	294998			3		1239.16	9611.75	53.9491	0.53915	671744			3		280.892	13951.3	15.3584	0.49809	282350												5		0.430487	195.224	0.978362	0.0307888	12773.4
	4		882.997	7807.49	29.5491	0.55274	297244			4		1336.41	9541.25	45.8736	0.41328	594697			4		885	8103.66	36.9488	0.52692	389764												6		0.00607371	250.368	0.0185364	0.0299365	6108.09
	5		971.281	11187.5	38.5256	0.68636	526167			5		1432.84	10787.7	26.266	0.51413	370984			5		972.557	11339.3	40.3526	0.60902	576470
	6		1074.91	8024.4	30.0319	0.59761	305010			6		1627.72	19676.1	96.4767	0.18646	2.7883e+06			6		1072.67	11829.3	42.0299	0.76673	585562												percentage		5.59075e-06	0.00648928	0.00303372	0.0460144	0.0208755
	7		1086.08	75575.6	6.30527	0.53689	618770			7		1739.88	18303.5	55.7699	0.66997	1.25571e+06			7		1085.82	79364.5	6.25243	0.64318	618033
																																					nomralized intensities
	Peak #	Peak Type	Center X	Height	FWHH	Other	Area			Peak #	Peak Type	Center X	Height	FWHH	Other	Area			Peak #	Peak Type	Center X	Height	FWHH	Other	Area												Peak #	Peak Type	Center X	Height	FWHH	Other	Area
	1		0.0255439	7.34155	0.187319	0.00691989	1040.97			1		0.208408	100.839	0.351695	0.038362	2148.69			1		0.0446239	60.0161	0.276556	0.0235537	1670.98												1		258.494	0.0610559	51.241	0.55645	155457
	2		1.16726	16.1424	2.23915	0.0108261	11723.3			2		0.0063726	244.342	0.00491634	0.0168914	6484.22			2		0.681596	237.265	7.06994	0.116317	25322.2												2		281.446	0.189303	15.3787	0.51482	147062
	3		0.0414758	167.281	0.302039	0.00375904	8539.29			3		0.0350964	18.4425	0.0638079	0.00688843	3790.56			3		0.11674	95.0556	0.183111	0.00321479	4983.61												3		882.734	0.148694	43.6631	0.50071	329400
	4		0.0470052	71.2911	0.364806	0.0128952	1956.66			4		0.0948087	52.3584	0.695075	0.0284211	556.959			4		0.114494	53.8937	0.762024	0.00941667	6178.54												4		971.976	0.219135	39.9054	0.98827	361136
	5		0.0641994	26.2188	0.452666	0.0619908	8458.83			5		0.0393975	30.2238	0.460734	0.00435616	7081.68			5		0.195669	36.3216	0.915924	0.0572467	1489.75												5		1075.45	0.186028	40.087	0.87755	323877
	6		0.291659	134.925	0.910635	0.0424268	9217.93			6		0.355567	155.326	0.586002	0.0614053	63344.7			6		0.948952	429.538	1.73065	0.170712	27469.1												6		1086.39	1	6.11013	0.65059	292596
	7		0.00748398	334.668	0.0159405	0.0167268	8334.68			7		0.0608063	206.479	0.0713684	0.0531258	42540.8			7		0.00483322	1069.91	0.0314509	0.0730921	28288.6
	percentage		6.89082e-06	0.00442826	0.00252813	0.031155	0.0134697			percentage		5.86758e-06	0.00325357	0.000782764	0.0309333	0.010623			percentage		4.45122e-06	0.013481	0.00503019	0.113642	0.0457719
	nomralized intensities									nomralized intensities									nomralized intensities
	Peak #	Peak Type	Center X	Height	FWHH	Other	Area			Peak #	Peak Type	Center X	Height	FWHH	Other	Area			Peak #	Peak Type	Center X	Height	FWHH	Other	Area
	1		144.048	0.0871546	18.2066	0.51451	156932			1		1074.69	0.122721	37.4914	0.62234	433318			1		155.009	0.0512869	6.6277	0.53663	35039.9
	2		251.261	0.0516869	46.1198	0.53113	233846			2		1086.07	1	6.28074	0.54606	610393			2		255.001	0.0503359	72.6755	0.70684	349659
	3		281.27	0.179047	16.6323	0.51116	294998			3		1239.16	0.127987	53.9491	0.53915	671744			3		280.892	0.175787	15.3584	0.49809	282350
	4		882.997	0.103307	29.5491	0.55274	297244			4		1336.41	0.127048	45.8736	0.41328	594697			4		885	0.102107	36.9488	0.52692	389764
	5		971.281	0.148031	38.5256	0.68636	526167			5		1432.84	0.143646	26.266	0.51413	370984			5		972.557	0.142876	40.3526	0.60902	576470
	6		1074.91	0.106177	30.0319	0.59761	305010			6		1627.72	0.262	96.4767	0.18646	2.7883e+06			6		1072.67	0.14905	42.0299	0.76673	585562
	7		1086.08	1	6.30527	0.53689	618770			7		1739.88	0.243723	55.7699	0.66997	1.25571e+06			7		1085.82	1	6.25243	0.64318	618033
[truncated: 87 more columns]

## Sheet: FWHM values
FWHM values of the v1(CO3) symmetric stretching band of spectra
from calcite and a transect through a tubular structure.
Spetcra	texture	position (cm-1)	FWHM (cm-1)
Sp1	micrite	1086.08	6.30527
Sp2	micrite	1085.99	6.13623
Sp3	micrite	1086.27	6.71452
Sp4	sheaf crystals	1086.2	7.71305
Sp5	sheaf crystals	1086.36	6.85241
Sp6	sheaf crystals	1087.08	7.4778
Sp7	outer lamina	1086.19	6.65733
Sp17	spar	1086.57	8.03608
Sp8	micrite	1086.08	6.30527
Sp9	micrite	1086.07	6.28074
Sp10	outer lamina	1086.38	6.11323
Sp11	outer lamina	1085.58	7.35923
Sp12	micrite lamina	1086.36	6.7076
Sp13	micrite lamina	1086.12	6.80002
Sp14	spar	1086.55	7.11263
Sp15	spar	1085.98	6.20544
Sp16	blocky calcite	1086.39	6.87263
			6.20544
			7.35923
