# Supplementary material
Source: Research Square preprint supplement (doi:10.21203/rs.3.rs-9200516/v1)
Supplement: Supplementary file 4 [file f7cc04a1f40d72d1bac69863.xlsx]

## Sheet: Unknowns
Sample	Quality control		Spot location	Date	Session						Approximate concentrations4					Ratios
		Thin or thick section				206Pb	207Pb	208Pb	238U afmb	232Th afmb	Pb ppm	Uppm	Thppm	Th/U	uncertainty	238U/206Pb	2σ1	207Pb/206Pb	2σ1	208PbT/206Pb3	208PbC/206Pb3	2σ1	207Pb/235U	2σ1	206Pb/238U	2σ1
SV-5a_spar - 1		thin	spar	2025-04-25	2	960	735.258	1912.72	28837.2	4612.45	0.0473	0.407	0.063	0.159948	0.00319896	30.0387	4.28863	0.805	0.09	1.99242	1.99017	0.196925	3.69335	0.669738	0.0332904	0.00475287
SV-5a_spar - 2		thin	spar	2025-04-25	2	3650	2973.4	7108.79	54073.8	16004.3	0.176	0.761	0.226	0.295972	0.00591944	14.8147	1.03654	0.814	0.04	1.94761	1.94453	0.107788	7.57245	0.647437	0.0675004	0.00472278
SV-5a_spar - 3		thin	spar	2025-04-25	2	3260	2639.65	6546.22	28588.1	7441.99	0.164	0.421	0.109	0.260317	0.00520635	8.76937	1.62564	0.809	0.051	2.00804	2.00481	0.124999	12.7141	2.48946	0.114033	0.0211392
SV-5a_spar - 4		thin	spar	2025-04-25	2	13720	11216	27923.7	117474	46661	0.699	1.643	0.657	0.397204	0.00794408	8.56222	0.642098	0.815	0.024	2.03526	2.03127	0.0653898	13.1183	1.0569	0.116792	0.00875849
SV-5a_spar - 5		thin	spar	2025-04-25	2	3320	2649.76	6515.54	110403	17746.4	0.1632	1.758	0.283	0.160742	0.00321484	33.2539	5.24511	0.797	0.048	1.96251	1.95974	0.103694	3.3031	0.557683	0.0300717	0.00474318
SV-5a_spar - 6		thin	spar	2025-04-25	2	5040	4116.23	10248.9	155696	27617.3	0.258	2.21	0.393	0.177379	0.00354759	30.8921	2.19961	0.819	0.032	2.03352	2.03202	0.0935418	3.65378	0.296756	0.0323707	0.00230489
SV-5a_spar - 7		thin	spar	2025-04-25	2	12980	10872.1	27514.6	142570	23101.2	0.695	2.025	0.329	0.162034	0.00324068	10.9839	0.624305	0.831	0.015	2.11977	2.11918	0.0439148	10.4268	0.621812	0.0910427	0.00517473
SV-5a_spar - 8		thin	spar	2025-04-25	2	2790	2255.33	5472.23	190091	14271.4	0.139	2.704	0.203	0.0750766	0.00150153	68.1329	4.86234	0.821	0.048	1.96137	1.9608	0.108137	1.6607	0.15321	0.0146772	0.00104745
SV-5a_spar - 9		thin	spar	2025-04-25	2	3590	2720.56	6638.28	216876	24388.9	0.171	3.13	0.353	0.112455	0.0022491	60.4112	5.26791	0.755	0.036	1.8491	1.84527	0.112376	1.72241	0.171183	0.0165532	0.00144346
SV-5a_spar - 10		thin	spar	2025-04-25	2	1950	1355.22	3221.97	339813	19390.5	0.0831	4.99	0.284	0.0570621	0.00114124	174.263	14.451	0.686	0.039	1.65229	1.64877	0.0798208	0.542531	0.0545475	0.00573845	0.000475867
SV-5a_spar - 11		thin	spar	2025-04-25	2	4440	3367.83	8223.69	380162	19261	0.213	5.542	0.28	0.0506653	0.00101331	85.6222	8.98332	0.756	0.029	1.85218	1.85047	0.0668658	1.21686	0.135937	0.0116792	0.00122536
SV-5a_spar - 12		thin	spar	2025-04-25	2	7060	5481.57	13501.6	391686	17419.2	0.35	5.67	0.252	0.0444724	0.000889447	55.4797	4.46734	0.773	0.021	1.91241	1.91121	0.0499509	1.92022	0.163183	0.0180246	0.00145138
SV-5a_spar - 13		thin	spar	2025-04-25	2	5400	4389.3	10433	243650	15215.9	0.274	3.58	0.222	0.06245	0.001249	45.1204	8.80644	0.781	0.026	1.93204	1.93057	0.0653699	2.38553	0.472323	0.0221629	0.00432568
SV-5a_spar - 14		thin	spar	2025-04-25	2	4390	3317.26	8141.86	318246	12559.3	0.213	4.783	0.187	0.0394642	0.000789284	72.4934	9.06567	0.756	0.026	1.85464	1.85331	0.0674414	1.43724	0.186407	0.0137944	0.00172505
SV-5a_spar - 15		thin	spar	2025-04-25	2	1230	1011.36	2403.69	143972	4139.21	0.0633	2.2	0.061	0.02875	0.000575	117.051	10.8385	0.844	0.082	1.95422	1.95427	0.1506	0.993743	0.133375	0.0085433	0.000791084
SV-5a_spar - 16		thin	spar	2025-04-25	2	4890	3802.71	9369.28	315947	23527.8	0.247	4.712	0.35	0.0744674	0.00148935	64.6109	3.11536	0.773	0.022	1.91601	1.91401	0.0611109	1.64884	0.0923193	0.0154773	0.000746272
SV-5a_spar - 17		thin	spar	2025-04-25	2	4630	3620.67	9001.05	287695	15848.8	0.242	4.371	0.238	0.0550888	0.00110178	62.1372	5.18989	0.779	0.024	1.94407	1.94272	0.0811567	1.72779	0.153815	0.0160934	0.00134417
SV-5a_spar - 18		thin	spar	2025-04-25	2	1720	1203.52	2863.97	246420	6324.86	0.0771	3.712	0.0933	0.0256669	0.000513339	143.268	13.8843	0.709	0.043	1.6651	1.66375	0.106057	0.682031	0.0779731	0.00697994	0.000676439
SV-5a_spar - 19		thin	spar	2025-04-25	2	3140	2467.72	6147.31	138798	11191.2	0.166	2.109	0.168	0.080629	0.00161258	44.2033	6.90289	0.794	0.035	1.95774	1.95625	0.108556	2.47555	0.401693	0.0226227	0.00353282
SV-5a_spar - 20		thin	spar	2025-04-25	2	9250	7615.53	18513.5	167641	15890.7	0.503	2.559	0.24	0.0947898	0.0018958	18.1234	1.97574	0.824	0.027	2.00146	2.00085	0.0677786	6.26606	0.713291	0.0551774	0.00601522
SV-5a_spar - 21		thin	spar	2025-04-25	2	2810	2174.42	5543.83	240598	10798.2	0.1507	3.761	0.166	0.0448806	0.000897612	85.6222	5.72164	0.791	0.031	1.97289	1.97201	0.0773684	1.2732	0.0986332	0.0116792	0.000780456
SV-5a_spar - 22		thin	spar	2025-04-25	2	4870	3792.6	9410.19	309687	13659.7	0.258	4.75	0.206	0.0441082	0.000882164	63.5907	7.80095	0.777	0.026	1.93228	1.93116	0.0733312	1.68397	0.214127	0.0157256	0.00192912
SV-5a_spar - 23		thin	spar	2025-04-25	2	3940	2943.05	7456.56	352913	18949	0.204	5.41	0.286	0.0536932	0.00107386	89.5718	4.8052	0.753	0.025	1.89253	1.89065	0.0703542	1.15859	0.0730942	0.0111642	0.000598921
SV-5a_spar - 24		thin	spar	2025-04-25	2	10900	8798.82	22093.5	308663	28687.3	0.607	4.764	0.437	0.0929404	0.00185881	28.3177	3.50019	0.803	0.016	2.02693	2.02555	0.0643469	3.90807	0.48929	0.0353135	0.0043649
SV-5a_spar - 25		thin	spar	2025-04-25	2	1710	1152.95	2823.06	254720	5434.41	0.0782	4.17	0.0867	0.0213348	0.000426697	148.959	93.2467	0.684	0.054	1.65091	1.64958	0.180568	0.632841	0.39929	0.00671325	0.00420242
SV-5a_spar - 26		thin	spar	2025-04-25	2	2830	2224.99	5492.69	148664	5659.8	0.1525	2.472	0.0917	0.0380711	0.000761421	52.5315	4.28701	0.787	0.028	1.94088	1.94007	0.0780814	2.06472	0.183815	0.0190362	0.00155352
SV-5a_spar - 27		thin	spar	2025-04-25	2	6130	4894.98	12581	151840	14930.9	0.35	2.83	0.274	0.0983333	0.00196667	24.77	3.53658	0.797	0.026	2.05237	2.05067	0.0700608	4.43444	0.649452	0.0403715	0.00576411
SV-5a_spar - 28		thin	spar	2025-04-25	2	8100	7585.19	16263.3	163110	12313.8	0.45	2.555	0.19	0.0754938	0.00150988	20.1371	4.48097	0.813	0.034	2.00781	2.00699	0.129157	5.56417	1.25983	0.0496597	0.0110504
SV-5a_spar - 29		thin	spar	2025-04-25	2	3260	2467.72	5952.97	341845	15467.2	0.166	5.521	0.246	0.0452463	0.000904926	104.86	9.50101	0.765	0.038	1.82606	1.8247	0.0789649	1.00544	0.103891	0.0095365	0.000864067
SV-5a_spar - 30		thin	spar	2025-04-25	2	7180	5693.95	14524.4	94751.7	31583.9	0.407	1.61	0.54	0.333333	0.00666667	13.1966	1.678	0.79	0.033	2.0229	2.01622	0.12793	8.25031	1.10422	0.075777	0.00963532
SV-5a_spar - 31		thin	spar	2025-04-25	2	1160	879.882	2188.89	48329	4348.68	0.0613	0.822	0.0723	0.0899807	0.00179961	41.6629	8.72396	0.779	0.07	1.88698	1.88477	0.179396	2.57688	0.587169	0.0240022	0.00502591
SV-5a_spar - 32		thin	spar	2025-04-25	2	2940	2305.9	5564.29	170051	14053.8	0.157	2.692	0.22	0.0826446	0.00165289	57.8405	5.16642	0.786	0.03	1.89261	1.89082	0.0946307	1.87282	0.181916	0.0172889	0.00154428
SV-5a_spar - 33		thin	spar	2025-04-25	2	4440	3226.24	8428.26	305574	17258	0.239	4.995	0.283	0.0564773	0.00112955	68.8229	5.86879	0.734	0.042	1.89826	1.89585	0.121317	1.46984	0.150942	0.0145301	0.00123903
SV-5a_spar - 34		thin	spar	2025-04-25	2	7600	5876	14933.6	347237	22421.6	0.423	5.58	0.362	0.0645714	0.00129143	45.6891	4.48983	0.774	0.021	1.96494	1.96323	0.0571204	2.33472	0.238014	0.021887	0.00215082
SV-5a_spar - 35		thin	spar	2025-04-25	2	6300	5259.07	13501.6	152236	21216.5	0.38	2.415	0.338	0.139366	0.00278732	24.1645	7.02583	0.819	0.052	2.14311	2.14193	0.132019	4.67103	1.39011	0.0413831	0.0120321
SV-5a_spar - 36		thin	spar	2025-04-25	2	3420	2669.99	6607.59	293753	10335.8	0.188	4.74	0.167	0.0351852	0.000703704	85.8927	6.03664	0.787	0.036	1.93204	1.9313	0.0771349	1.26277	0.105891	0.0116424	0.000818244
SV-5a_spar - 37		thin	spar	2025-04-25	2	6700	5461.34	14115.3	137464	25260.9	0.403	2.163	0.402	0.183764	0.00367528	20.517	4.65088	0.801	0.019	2.10676	2.10388	0.137304	5.38052	1.22634	0.04874	0.0110486
Following datapoints resulted in unconstrained ages.
SV-5a_lamina1 - 1		thick	lamina 1	2025-04-25	2	23200	18811.3	46948.7	191992	82367.8	1.435	3.32	1.43	0.429017	0.00858034	8.27551	0.41564	0.815	0.011	2.02365	2.01935	0.0448793	13.5728	0.705883	0.120839	0.00606916
SV-5a_lamina1 - 10		thick	lamina 1	2025-04-25	2	44000	35802.1	89192.3	132536	98373.4	2.81	2.29	1.7	0.742236	0.0148447	3.01219	0.175399	0.816	0.012	2.0271	2.01996	0.0365576	37.3348	2.24225	0.331984	0.0193313
SV-5a_lamina1 - 11		thick	lamina 1	2025-04-25	2	19070	15868.2	39379.6	132081	52372.1	1.241	2.461	0.97	0.396514	0.00793028	6.92612	0.640735	0.837	0.022	2.065	2.06453	0.0424112	16.6549	1.60172	0.144381	0.0133567
SV-5a_lamina1 - 12		thick	lamina 1	2025-04-25	2	16400	13349.9	33038	134086	36763.9	1.043	2.58	0.701	0.274182	0.00548365	8.17595	1.21569	0.818	0.021	2.01451	2.01209	0.0645935	13.7886	2.08058	0.12231	0.0181864
SV-5a_lamina1 - 13		thick	lamina 1	2025-04-25	2	25520	21198.1	52165.2	138752	93683.2	1.65	2.47	1.651	0.675182	0.0135036	5.43701	0.345061	0.831	0.018	2.04409	2.04165	0.0498559	21.0643	1.41257	0.183925	0.0116728
SV-5a_lamina1 - 14		thick	lamina 1	2025-04-25	2	32300	26598.7	66280.5	119874	72372.9	2.1	2.123	1.269	0.603741	0.0120748	3.71127	0.260148	0.824	0.017	2.05203	2.04815	0.0460659	30.5993	2.23588	0.26945	0.0188876
SV-5a_lamina1 - 15		thick	lamina 1	2025-04-25	2	22870	18598.9	52574.3	524660	1.40864e+06	1.675	9.22	24.41	2.68486	0.0536971	22.941	1.20781	0.816	0.015	2.29883	2.27298	0.0583999	4.90213	0.273369	0.0435902	0.00229496
SV-5a_lamina1 - 16		thick	lamina 1	2025-04-25	2	16300	13430.8	34163.1	115395	51187.2	1.09	2.12	0.925	0.443583	0.00887166	7.07944	0.363342	0.825	0.015	2.0959	2.09323	0.0517505	16.0606	0.874481	0.141254	0.00724966
SV-5a_lamina1 - 17		thick	lamina 1	2025-04-25	2	39200	32161.2	80804.9	167161	270642	2.58	3.08	4.9	1.61905	0.032381	4.26432	0.374793	0.822	0.012	2.06135	2.04967	0.0277063	26.5661	2.36689	0.234504	0.0206106
SV-5a_lamina1 - 18		thick	lamina 1	2025-04-25	2	25200	20904.8	52062.9	136944	46854.6	1.665	2.494	0.841	0.342144	0.00684288	5.43429	0.231611	0.825	0.014	2.06599	2.06393	0.0509073	20.9227	0.959813	0.184017	0.00784283
SV-5a_lamina1 - 19		thick	lamina 1	2025-04-25	2	17800	14765.8	36720.2	165859	82426.9	1.176	3.03	1.48	0.49697	0.00993939	9.31792	0.516902	0.831	0.013	2.06293	2.06114	0.0352602	12.291	0.708425	0.10732	0.00595347
SV-5a_lamina1 - 2		thick	lamina 1	2025-04-25	2	19170	14907.4	37640.8	146284	72641.8	1.152	2.525	1.26	0.49658	0.0099316	7.63089	0.515279	0.791	0.022	1.96352	1.95377	0.0611214	14.2859	1.04329	0.131046	0.00884896
SV-5a_lamina1 - 20		thick	lamina 1	2025-04-25	2	33500	28419.2	69655.9	162625	84380.8	2.233	2.92	1.49	0.518868	0.0103774	4.85447	0.345653	0.833	0.018	2.07928	2.07782	0.0405419	23.6488	1.7597	0.205996	0.0146675
SV-5a_lamina1 - 21		thick	lamina 1	2025-04-25	2	26060	20530.6	50835.5	246415	131294	1.631	4.77	2.49	0.532819	0.0106564	9.45567	1.35609	0.789	0.02	1.95071	1.93982	0.0455419	11.4998	1.67482	0.105757	0.0151672
SV-5a_lamina1 - 22		thick	lamina 1	2025-04-25	2	18850	15342.3	37947.6	127156	57053.2	1.219	2.314	1.02	0.448687	0.00897375	6.74567	0.438164	0.825	0.014	2.01314	2.01044	0.0354971	16.8552	1.13158	0.148243	0.00962912
SV-5a_lamina1 - 23		thick	lamina 1	2025-04-25	2	20030	16515.5	40913.9	100372	55184	1.316	1.816	0.984	0.549797	0.0109959	5.01107	0.272725	0.828	0.012	2.04263	2.03998	0.0399455	22.7723	1.28256	0.199558	0.0108609
SV-5a_lamina1 - 24		thick	lamina 1	2025-04-25	2	43700	35701	89294.5	120302	89628.9	2.87	2.135	1.57	0.74503	0.0149006	2.75292	0.134613	0.8175	0.0097	2.04335	2.03664	0.0353737	40.9261	2.0593	0.363251	0.0177624
SV-5a_lamina1 - 25		thick	lamina 1	2025-04-25	2	14750	12176.8	30992.3	129453	21133	0.999	2.341	0.377	0.163249	0.00326498	8.77645	0.548696	0.828	0.015	2.10117	2.10038	0.0478527	13.0022	0.846327	0.113941	0.00712351
SV-5a_lamina1 - 26		thick	lamina 1	2025-04-25	2	14640	12065.5	30174	137593	38288.6	0.973	2.482	0.68	0.278274	0.00556548	9.39846	0.468614	0.825	0.016	2.06106	2.05939	0.0414497	12.0977	0.647224	0.1064	0.0053052
SV-5a_lamina1 - 27		thick	lamina 1	2025-04-25	2	13150	10882.2	26900.9	140741	26651.7	0.866	2.537	0.474	0.189366	0.00378733	10.7028	0.470862	0.828	0.011	2.04569	2.04478	0.0317486	10.662	0.489989	0.0934337	0.00411056
SV-5a_lamina1 - 28		thick	lamina 1	2025-04-25	2	15830	12904.9	32322	115994	50148.7	1.042	2.101	0.898	0.432337	0.00864675	7.3275	0.387027	0.813	0.011	2.04182	2.03714	0.0373276	15.2912	0.833733	0.136472	0.00720824
SV-5a_lamina1 - 29		thick	lamina 1	2025-04-25	2	19740	16485.2	41016.2	155208	60220.8	1.32	2.77	1.06	0.388	0.00776	7.86263	0.446587	0.836	0.013	2.07782	2.0772	0.0399912	14.6536	0.862934	0.127184	0.00722388
SV-5a_lamina1 - 3		thick	lamina 1	2025-04-25	2	13050	10588.9	26542.9	127958	43748.2	0.815	2.154	0.74	0.341894	0.00683788	9.80524	0.363572	0.821	0.016	2.03394	2.03133	0.0413907	11.5396	0.483381	0.101986	0.00378158
SV-5a_lamina1 - 30		thick	lamina 1	2025-04-25	2	31800	25789.7	64541.6	122189	103014	2.08	2.21	1.84	0.843072	0.0168614	3.84241	0.195056	0.816	0.013	2.02961	2.0215	0.0341492	29.268	1.55721	0.260253	0.0132115
SV-5a_lamina1 - 31		thick	lamina 1	2025-04-25	2	36900	30239.6	74974.7	123083	70649.5	2.41	2.256	1.282	0.573998	0.01148	3.33559	0.222948	0.828	0.013	2.03183	2.02907	0.0732926	34.2109	2.34887	0.299797	0.0200382
SV-5a_lamina1 - 32		thick	lamina 1	2025-04-25	2	15500	12642	31708.3	148762	61523.7	1.02	2.58	1.06	0.413571	0.00827143	9.59754	0.88056	0.817	0.029	2.04569	2.04188	0.0666621	11.7319	1.15413	0.104193	0.00955958
SV-5a_lamina1 - 33		thick	lamina 1	2025-04-25	2	8010	6472.7	16191.7	87450.7	26784.4	0.52	1.554	0.471	0.30628	0.00612559	10.9177	0.650609	0.813	0.024	2.02143	2.01811	0.0646858	10.2628	0.682509	0.0915945	0.00545832
SV-5a_lamina1 - 34		thick	lamina 1	2025-04-25	2	12390	10164.2	25673.5	136781	35510.4	0.824	2.49	0.64	0.259615	0.00519231	11.0396	1.20519	0.826	0.019	2.07211	2.07065	0.0601858	10.3117	1.15045	0.0905829	0.00988889
SV-5a_lamina1 - 35		thick	lamina 1	2025-04-25	2	16190	13471.3	32935.7	115367	146760	1.057	2.18	2.76	1.27211	0.0254423	7.12583	0.47658	0.834	0.019	2.03432	2.03126	0.0583617	16.1301	1.13966	0.140335	0.00938567
SV-5a_lamina1 - 36		thick	lamina 1	2025-04-25	2	9280	7433.49	18615.8	93609.3	35819.4	0.596	1.653	0.628	0.382647	0.00765295	10.0872	0.424341	0.804	0.02	2.00601	2.00049	0.0442208	10.9848	0.536845	0.0991354	0.00417035
SV-5a_lamina1 - 37		thick	lamina 1	2025-04-25	2	44600	36914.6	92260.8	121245	73129	2.96	2.32	1.399	0.60315	0.012063	2.7185	0.741278	0.82	0.012	2.06863	2.06379	0.0321307	41.5709	11.3518	0.367849	0.100305
SV-5a_lamina1 - 38		thick	lamina 1	2025-04-25	2	41600	28621.5	74565.6	318563	296843	2.39	6.46	6	0.931818	0.0186364	7.65776	2.76093	0.686	0.029	1.79244	1.73511	0.10216	12.3461	4.48175	0.130587	0.0470817
SV-5a_lamina1 - 39		thick	lamina 1	2025-04-25	2	41000	33577.1	82543.8	147627	85919.1	2.64	2.74	1.59	0.582	0.01164	3.60067	0.196955	0.812	0.013	2.01326	2.00673	0.040217	31.0799	1.77138	0.277726	0.0151915
SV-5a_lamina1 - 4		thick	lamina 1	2025-04-25	2	10400	8212.24	21582.1	112527	42368.1	0.663	1.86	0.702	0.376514	0.00753029	10.8199	0.750183	0.825	0.019	2.0752	2.07293	0.0751581	10.5084	0.767726	0.0924222	0.00640796
SV-5a_lamina1 - 40		thick	lamina 1	2025-04-25	2	30300	24950.2	62393.7	135034	45449	1.99	2.439	0.821	0.336574	0.00673149	4.45656	0.238087	0.825	0.01	2.0592	2.05717	0.0365986	25.5129	1.39764	0.224388	0.0119877
SV-5a_lamina1 - 5		thick	lamina 1	2025-04-25	2	11130	9274.16	22625.4	157794	51963.8	0.698	2.733	0.9	0.329315	0.00658629	14.1773	0.953275	0.829	0.025	2.03283	2.03137	0.0607419	8.05872	0.593866	0.0705351	0.00474274
SV-5a_lamina1 - 6		thick	lamina 1	2025-04-25	2	19700	16080.6	40402.5	175589	87094.4	1.249	3.051	1.523	0.496014	0.00992027	8.91313	0.971934	0.82	0.026	2.05089	2.04691	0.0492213	12.6791	1.43986	0.112194	0.0122342
SV-5a_lamina1 - 7		thick	lamina 1	2025-04-25	2	10870	8899.96	22093.5	135086	36160	0.69	2.316	0.621	0.267681	0.00535361	12.4274	0.933826	0.823	0.015	2.03252	2.03069	0.0532717	9.12691	0.705702	0.0804671	0.00604647
SV-5a_lamina1 - 8		thick	lamina 1	2025-04-25	2	15420	12864.5	31196.8	121505	51154.8	0.979	2.104	0.885	0.421008	0.00842017	7.87972	0.336393	0.818	0.014	2.02314	2.01943	0.0359017	14.307	0.658034	0.126908	0.00541782
SV-5a_lamina1 - 9		thick	lamina 1	2025-04-25	2	29500	23665.8	59325.1	257038	340770	1.862	4.69	6.2	1.32576	0.0265152	8.71315	0.693236	0.812	0.016	2.01102	1.99613	0.0560843	12.8436	1.05273	0.114769	0.00913126
SV-5a_lamina2 - 1		thick	lamina 2	2025-04-25	2	59800	48949.8	121514	155939	48425.8	3.48	2.5	0.788	0.310543	0.00621086	2.60768	0.134343	0.8183	0.0085	2.03201	2.02931	0.0366908	43.2479	2.2729	0.383483	0.0197564
SV-5a_lamina2 - 10		thick	lamina 2	2025-04-25	2	63800	52287.3	130822	205255	65193.9	3.84	3.354	1.078	0.317624	0.00635248	3.21716	0.169619	0.826	0.011	2.0505	2.04872	0.0281409	35.3845	1.92417	0.310833	0.0163881
SV-5a_lamina2 - 11		thick	lamina 2	2025-04-25	2	59900	48848.6	125810	176041	60011.9	3.69	2.985	1.028	0.340897	0.00681793	2.93892	0.865979	0.827	0.01	2.10034	2.09856	0.0432791	38.7814	11.4369	0.340261	0.100261
SV-5a_lamina2 - 12		thick	lamina 2	2025-04-25	2	125500	104271	261849	153336	43278.3	7.8	3.12	0.883	0.282245	0.0056449	1.2218	0.269953	0.8306	0.0076	2.08644	2.08538	0.0266721	93.691	20.7185	0.818465	0.180837
SV-5a_lamina2 - 13		thick	lamina 2	2025-04-25	2	82000	68772.4	172861	186933	60461.1	5.14	3.238	1.05	0.323437	0.00646875	2.27967	0.377294	0.838	0.014	2.10806	2.1078	0.0315683	50.6615	8.4273	0.43866	0.0726001
SV-5a_lamina2 - 14		thick	lamina 2	2025-04-25	2	60000	48545.2	121514	221919	84647.3	3.63	3.68	1.41	0.381434	0.00762868	3.69864	0.232545	0.8084	0.008	2.02524	2.02041	0.0285474	30.1224	1.9172	0.270369	0.0169989
SV-5a_lamina2 - 15		thick	lamina 2	2025-04-25	2	38600	31352.1	78759.2	158212	59279	2.36	2.653	0.995	0.37468	0.00749361	4.09876	0.165802	0.814	0.01	2.04039	2.03649	0.0327225	27.3702	1.1571	0.243976	0.00986926
SV-5a_lamina2 - 16		thick	lamina 2	2025-04-25	2	47800	39645.3	99625.3	172112	63060.8	2.994	2.916	1.07	0.366394	0.00732789	3.60067	0.173352	0.8301	0.0087	2.08421	2.08276	0.0280426	31.7726	1.5655	0.277726	0.013371
SV-5a_lamina2 - 17		thick	lamina 2	2025-04-25	2	39300	32666.9	81418.6	171420	66382.1	2.45	2.889	1.119	0.387249	0.00774498	4.36182	0.189676	0.829	0.011	2.07172	2.07001	0.0270979	26.1935	1.19088	0.229262	0.00996956
SV-5a_lamina2 - 18		thick	lamina 2	2025-04-25	2	52700	43387.3	106683	115536	70993.4	3.22	2.01	1.23	0.614468	0.0122894	2.19234	0.106808	0.8191	0.0098	2.02434	2.0192	0.0272516	51.4914	2.58312	0.456133	0.0222221
SV-5a_lamina2 - 19		thick	lamina 2	2025-04-25	2	45300	36914.6	92772.2	161506	82354.3	2.81	3.022	1.54	0.509915	0.0101983	3.56525	0.488916	0.838	0.018	2.04795	2.04754	0.0513057	32.3936	4.49642	0.280485	0.038464
SV-5a_lamina2 - 2		thick	lamina 2	2025-04-25	2	81800	65839.5	167747	157992	60496.9	4.82	2.53	0.982	0.382911	0.00765823	1.93144	0.151159	0.813	0.017	2.0507	2.04656	0.0742707	58.0116	4.69938	0.517748	0.0405201
SV-5a_lamina2 - 20		thick	lamina 2	2025-04-25	2	41900	34406.4	85305.4	167569	61667.2	2.597	2.862	1.055	0.36801	0.00736019	3.99927	0.176867	0.8228	0.0075	2.03593	2.03339	0.0238843	28.3543	1.28032	0.250046	0.0110582
SV-5a_lamina2 - 21		thick	lamina 2	2025-04-25	2	75300	61692.9	154450	194956	66772.5	4.71	3.319	1.14	0.342501	0.00685003	2.58905	0.144899	0.8216	0.0083	2.05113	2.0486	0.0204487	43.7347	2.48722	0.386242	0.0216165
SV-5a_lamina2 - 3		thick	lamina 2	2025-04-25	2	53000	43791.8	108524	145536	41312.9	3.117	2.599	0.749	0.283867	0.00567734	2.74596	0.262919	0.828	0.016	2.04762	2.04626	0.0278843	41.5567	4.05917	0.364171	0.0348684
SV-5a_lamina2 - 4		thick	lamina 2	2025-04-25	2	74900	62502	156496	169680	75047.2	4.52	2.99	1.35	0.442287	0.00884574	2.26542	1.02755	0.837	0.01	2.08939	2.08886	0.0353915	50.9193	23.1041	0.441419	0.20022
SV-5a_lamina2 - 5		thick	lamina 2	2025-04-25	2	33500	27104.4	68428.5	57457.3	33349.4	1.99	0.93	0.545	0.58042	0.0116084	1.71514	0.0691957	0.815	0.015	2.04264	2.03684	0.0451186	65.4882	2.904	0.583041	0.0235222
SV-5a_lamina2 - 6		thick	lamina 2	2025-04-25	2	62600	51478.2	126628	143007	49562.7	3.68	2.37	0.84	0.346575	0.00693151	2.28446	0.0965692	0.824	0.011	2.02282	2.0206	0.0231435	49.7107	2.20368	0.437741	0.0185043
SV-5a_lamina2 - 7		thick	lamina 2	2025-04-25	2	67800	56636.1	145244	129344	57590.9	4.24	2.22	1.01	0.445255	0.00890511	1.90772	0.583712	0.831	0.014	2.14225	2.14064	0.0623523	60.0333	18.3964	0.524185	0.160387
SV-5a_lamina2 - 8		thick	lamina 2	2025-04-25	2	61400	50466.8	124787	109633	55305.9	3.64	1.83	0.94	0.504464	0.0100893	1.78555	0.123907	0.82	0.016	2.03237	2.02833	0.0351253	63.2918	4.56242	0.560051	0.0388644
SV-5a_lamina2 - 9		thick	lamina 2	2025-04-25	2	56600	47129.3	117832	172788	74672.5	3.45	2.805	1.229	0.432164	0.00864327	3.05278	0.113525	0.835	0.011	2.08184	2.08097	0.0292067	37.6961	1.48718	0.32757	0.0121814
SV-5a_micrite - 1		thick	micrite	2025-04-25	2	74100	60175.9	150870	302919	116005	4.81	5.67	2.17	0.382958	0.00765916	4.08798	0.218522	0.8122	0.0093	2.03603	2.03177	0.0300445	27.3817	1.49689	0.24462	0.0130761
SV-5a_micrite - 10		thick	micrite	2025-04-25	2	63800	53197.5	131436	191647	100735	4.16	3.453	1.826	0.525628	0.0105126	3.00387	0.243122	0.8377	0.0086	2.06012	2.05964	0.0315905	38.4338	3.13561	0.332904	0.0269439
SV-5a_micrite - 11		thick	micrite	2025-04-25	2	55100	45207.7	114866	182670	92759	3.63	3.242	1.656	0.507795	0.0101559	3.31525	0.199668	0.8185	0.0097	2.08468	2.0803	0.0298351	34.0258	2.08857	0.301636	0.0181667
SV-5a_micrite - 12		thick	micrite	2025-04-25	2	132000	110238	276169	171490	91919.4	8.73	3.108	1.68	0.536005	0.0107201	1.29917	0.129559	0.8321	0.0077	2.09219	2.09049	0.0269623	88.2708	8.84059	0.769725	0.0767605
SV-5a_micrite - 13		thick	micrite	2025-04-25	2	134600	110542	277192	174243	95475.7	8.74	3.29	1.82	0.547945	0.0109589	1.29453	0.236217	0.8258	0.0082	2.05937	2.05626	0.0220254	87.9165	16.0662	0.772484	0.140958
SV-5a_micrite - 14		thick	micrite	2025-04-25	2	68800	56838.4	141255	159516	75896.5	4.46	2.796	1.337	0.475791	0.00951582	2.31855	0.0991062	0.8273	0.0074	2.05313	2.05071	0.0235075	49.1758	2.14754	0.431303	0.018436
SV-5a_micrite - 15		thick	micrite	2025-04-25	2	55000	45571.8	114047	161336	109536	3.601	2.852	1.94	0.678934	0.0135787	2.93337	0.11331	0.8295	0.0085	2.07359	2.07073	0.026612	38.9722	1.55748	0.340904	0.0131684
SV-5a_micrite - 16		thick	micrite	2025-04-25	2	88600	72413.3	181044	147994	81336.9	5.73	2.7	1.488	0.549598	0.010992	1.67036	0.117105	0.8216	0.0073	2.04339	2.03934	0.025062	67.7887	4.79052	0.598675	0.0419717
SV-5a_micrite - 17		thick	micrite	2025-04-25	2	100100	83942.8	208149	174437	99119.1	6.58	3.068	1.746	0.568222	0.0113644	1.74263	0.0711209	0.8295	0.0079	2.07941	2.07702	0.0206436	65.602	2.74931	0.573845	0.02342
SV-5a_micrite - 18		thick	micrite	2025-04-25	2	62600	51882.7	130311	159045	73477	4.12	2.792	1.289	0.461988	0.00923977	2.54066	0.12228	0.8282	0.0095	2.08164	2.07946	0.0366334	44.9257	2.2228	0.393599	0.0189436
SV-5a_micrite - 19		thick	micrite	2025-04-25	2	46500	38229.4	94817.9	153225	93815.3	3	2.692	1.65	0.612272	0.0122454	3.29516	0.147897	0.823	0.011	2.0391	2.03492	0.0256282	34.4215	1.612	0.303476	0.013621
SV-5a_micrite - 2		thick	micrite	2025-04-25	2	79900	65930.5	164065	250963	72949.6	5.228	4.455	1.296	0.290679	0.00581357	3.14096	0.101092	0.8243	0.0069	2.05338	2.05155	0.0267977	36.1683	1.20281	0.318374	0.0102469
SV-5a_micrite - 20		thick	micrite	2025-04-25	2	49300	41162.3	101466	168688	96085.2	3.208	2.988	1.7	0.569605	0.0113921	3.42165	0.147868	0.836	0.009	2.05814	2.05723	0.0235987	33.6726	1.49965	0.292256	0.01263
SV-5a_micrite - 21		thick	micrite	2025-04-25	2	52110	43306.4	108524	163865	88062.1	3.43	2.916	1.564	0.537406	0.0107481	3.1446	0.111263	0.8308	0.0086	2.0826	2.08061	0.0277054	36.4114	1.34233	0.318006	0.0112518
SV-5a_micrite - 22		thick	micrite	2025-04-25	2	60300	49657.7	124480	165165	85807.7	3.94	2.932	1.521	0.519529	0.0103906	2.73905	0.133388	0.8315	0.0072	2.06435	2.06258	0.0272634	41.8378	2.0694	0.365091	0.0177794
SV-5a_micrite - 23		thick	micrite	2025-04-25	2	261000	215419	533926	215009	98703.8	16.9	4.02	1.842	0.459068	0.00918137	0.823789	0.0832932	0.828	0.0056	2.04569	2.04349	0.0204153	138.522	14.0373	1.2139	0.122738
SV-5a_micrite - 24		thick	micrite	2025-04-25	2	44300	36611.2	91544.8	171430	82783.8	2.9	3.09	1.49	0.482901	0.00965802	3.86976	0.296155	0.828	0.015	2.06647	2.06415	0.0355495	29.4885	2.31914	0.258414	0.0197766
SV-5a_micrite - 25		thick	micrite	2025-04-25	2	45300	37622.6	93590.5	157882	88184	2.96	3.046	1.7	0.558542	0.0111708	3.48526	0.419579	0.833	0.015	2.06602	2.06445	0.0410747	32.9394	4.00958	0.286923	0.0345416
SV-5a_micrite - 26		thick	micrite	2025-04-25	2	123200	102046	253052	188953	96261	8.01	3.662	1.86	0.509443	0.0101889	1.53371	0.12204	0.8263	0.008	2.054	2.0512	0.0294933	74.2506	5.95181	0.652013	0.0518817
SV-5a_micrite - 27		thick	micrite	2025-04-25	2	122800	100974	252132	180450	53127.4	7.99	3.226	0.946	0.294416	0.00588832	1.46946	0.0550451	0.821	0.0058	2.05319	2.05095	0.0192552	77	2.93522	0.680521	0.0254919
SV-5a_micrite - 28		thick	micrite	2025-04-25	2	75000	62502	155473	172057	79896.4	4.92	3.524	1.631	0.46436	0.00928719	2.2941	0.371608	0.8309	0.009	2.07297	2.07128	0.0243126	49.9164	8.10375	0.435902	0.0706094
SV-5a_micrite - 29		thick	micrite	2025-04-25	2	87100	71806.5	177975	172833	74472.1	5.65	3.253	1.396	0.43089	0.0086178	1.98431	0.114358	0.8264	0.0088	2.04335	2.041	0.0307708	57.3967	3.36384	0.503954	0.0290435
SV-5a_micrite - 3		thick	micrite	2025-04-25	2	53500	44297.5	110570	259830	122273	3.52	4.63	2.19	0.470588	0.00941176	4.85664	0.257431	0.83	0.012	2.06672	2.06484	0.0339224	23.5531	1.29406	0.205904	0.0109141
SV-5a_micrite - 30		thick	micrite	2025-04-25	2	38900	32161.2	79679.8	143877	96569.1	2.523	2.953	1.97	0.671191	0.0134238	3.69864	0.634161	0.827	0.013	2.04832	2.04482	0.0323944	30.8155	5.30571	0.270369	0.0463569
SV-5a_micrite - 4		thick	micrite	2025-04-25	2	51100	42072.5	104944	184544	97597.4	3.34	3.274	1.737	0.528857	0.0105771	3.61143	0.143505	0.823	0.011	2.0537	2.0501	0.0360372	31.407	1.31671	0.276899	0.011003
SV-5a_micrite - 5		thick	micrite	2025-04-25	2	61900	49556.6	122639	320525	304063	3.9	6	5.7	0.94864	0.0189728	5.1781	0.652833	0.805	0.028	1.98125	1.96795	0.0702018	21.4255	2.80215	0.193121	0.0243479
SV-5a_micrite - 6		thick	micrite	2025-04-25	2	140000	113272	288443	274795	197982	9.16	4.61	3.33	0.720472	0.0144094	1.96282	0.163366	0.8275	0.0095	2.06031	2.0567	0.0296602	58.1024	4.88166	0.509471	0.0424034
SV-5a_micrite - 7		thick	micrite	2025-04-25	2	69300	56636.1	141971	215922	99948.9	4.5	3.801	1.769	0.462892	0.00925785	3.11576	0.242204	0.827	0.012	2.04865	2.04623	0.0296966	36.5803	2.89269	0.320949	0.024949
SV-5a_micrite - 8		thick	micrite	2025-04-25	2	128200	105889	265531	219535	108127	8.41	4.23	2.1	0.492525	0.00985049	1.71244	0.179666	0.8228	0.0066	2.07123	2.06783	0.0203894	66.2192	6.96787	0.583961	0.0612681
SV-5a_micrite - 9		thick	micrite	2025-04-25	2	68700	56838.4	141767	195051	109653	4.49	3.515	1.99	0.562179	0.0112436	2.83917	0.164596	0.828	0.014	2.06356	2.06086	0.0359726	40.1925	2.42718	0.352216	0.0204192

## Sheet: Reference materials
Sample	Primary/ Secondary	Date	Session						Approximate concentrations4					Ratios
				206Pb	207Pb	208Pb	238U afmb	232Th afmb	Pb ppm	Uppm	Thppm	Th/U	uncertainty	238U/206Pb	2σ1	207Pb/206Pb	2σ1	208PbT/206Pb3	208PbC/206Pb3	2σ1	207Pb/235U	2σ1	206Pb/238U	2σ1
WC-1 - 1	Primary	2025-04-25	2	21430	2740.78	4398.24	482464	437.998	0.107	6.574	0.00252	0.000907835	1.81567e-05	22.5135	0.985403	0.122	0.018	0.205238	0.204978	0.0486089	0.746832	0.114935	0.0444178	0.00194414
WC-1 - 10	Primary	2025-04-25	2	4210	349.93	326.288	100836	80.4652	0.0104	1.798	0.0001	0.00079798	1.59596e-05	23.9516	0.950656	0.0835	0.0074	0.0775031	0.0772626	0.0190529	0.480461	0.0466551	0.0417509	0.00165712
WC-1 - 11	Primary	2025-04-25	2	7630	482.418	265.94	185322	94.7202	0.0085	3.32	0.00044	0.000511111	1.02222e-05	24.2886	0.770381	0.0626	0.0043	0.0348546	0.0346962	0.0180727	0.355204	0.0268745	0.0411715	0.00130587
WC-1 - 12	Primary	2025-04-25	2	10910	1444.22	2444.6	240347	169.403	0.0789	4.321	0.00181	0.000704827	1.40965e-05	22.03	0.747012	0.1305	0.006	0.22407	0.223871	0.0190995	0.816397	0.0466398	0.0453926	0.00153921
WC-1 - 13	Primary	2025-04-25	2	9210	809.087	826.46	215376	149.382	0.0265	3.86	0.00143	0.000693587	1.38717e-05	23.385	0.822945	0.0879	0.0041	0.0897351	0.0895273	0.0088264	0.518033	0.0302687	0.0427625	0.00150486
WC-1 - 14	Primary	2025-04-25	2	11720	964.837	1071.94	273601	227.745	0.034	4.83	0.00278	0.000832396	1.66479e-05	23.3448	0.724712	0.0824	0.003	0.0914628	0.0912115	0.00659549	0.486455	0.0232749	0.0428361	0.00132979
WC-1 - 15	Primary	2025-04-25	2	14300	1334.99	1697.93	332546	324.36	0.0537	5.88	0.00453	0.000975385	1.95077e-05	23.255	0.773137	0.0933	0.0042	0.118736	0.118446	0.00861577	0.552933	0.0309432	0.0430016	0.00142964
WC-1 - 16	Primary	2025-04-25	2	9640	1092.27	1605.87	217120	63.5573	0.0508	3.85	1e-05	0.000292729	5.85458e-06	22.5228	0.697198	0.1142	0.0062	0.166584	0.166499	0.0124355	0.698794	0.0436716	0.0443994	0.00137439
WC-1 - 17	Primary	2025-04-25	2	12310	1319.82	1789.98	287375	275.005	0.0566	5.13	0.00374	0.000956955	1.91391e-05	23.3448	0.732701	0.1076	0.0039	0.145409	0.145129	0.0103437	0.635225	0.0304564	0.0428361	0.00134445
WC-1 - 2	Primary	2025-04-25	2	15840	1128.68	816.232	382171	276.303	0.0209	5.5	0.00153	0.000722983	1.44597e-05	24.1269	0.728632	0.0713	0.003	0.0515298	0.0513083	0.00402184	0.40728	0.0210938	0.0414474	0.00125171
WC-1 - 3	Primary	2025-04-25	2	11110	793.917	468.464	279848	184.861	0.0125	4.184	0.00091	0.000660576	1.32115e-05	25.1888	0.825024	0.0708	0.0037	0.042166	0.0419634	0.0111447	0.387375	0.0238916	0.0397001	0.00130032
WC-1 - 4	Primary	2025-04-25	2	12630	1156.99	1139.45	306765	297.481	0.0314	4.78	0.00298	0.000969736	1.93947e-05	24.2886	0.731807	0.092	0.0037	0.0902179	0.0899288	0.00718416	0.522025	0.0262326	0.0411715	0.00124048
WC-1 - 5	Primary	2025-04-25	2	17170	1241.95	925.677	419566	368.375	0.0261	6.66	0.0043	0.00087799	1.75598e-05	24.436	0.773216	0.0727	0.0032	0.0539124	0.053644	0.00462885	0.410025	0.0222274	0.0409232	0.00129491
WC-1 - 6	Primary	2025-04-25	2	13460	1185.31	1278.56	320272	128.51	0.037	5.13	0.00068	0.000401254	8.02508e-06	23.7943	0.742112	0.0894	0.0045	0.0949895	0.0948695	0.0114643	0.517809	0.030662	0.0420268	0.00131076
WC-1 - 7	Primary	2025-04-25	2	8170	718.065	787.592	201957	97.3164	0.0234	3.35	0.0003	0.000481868	9.63736e-06	24.7193	0.805557	0.0876	0.0048	0.0964005	0.096256	0.0155724	0.488398	0.0311368	0.0404542	0.00131833
WC-1 - 8	Primary	2025-04-25	2	16860	1284.43	1143.54	400472	284.604	0.0347	6.79	0.0036	0.000710673	1.42135e-05	23.7528	0.756793	0.0772	0.0029	0.0678258	0.0676098	0.00394178	0.447929	0.0220636	0.0421004	0.00134137
WC-1 - 9	Primary	2025-04-25	2	14300	1404.78	1759.3	329655	391.891	0.0545	5.67	0.00551	0.00118879	2.37758e-05	23.0528	0.707055	0.0992	0.0057	0.123028	0.122677	0.00889868	0.593053	0.0386274	0.0433786	0.00133047
Duffbrown - 1	Secondary	2025-04-25	2	19130	4591.57	10606.9	1.38036e+06	10735	0.2593	18.92	0.146	0.007777	0.00015554	72.1567	2.3809	0.2389	0.0051	0.554465	0.552593	0.0174587	0.456295	0.0179323	0.0138587	0.000457286
Duffbrown - 10	Secondary	2025-04-25	2	23720	12379	31677.6	641461	8384.38	1.001	11.26	0.1464	0.0130707	0.000261415	27.0431	0.825044	0.5222	0.0082	1.33548	1.33382	0.0247639	2.66126	0.0913144	0.0369781	0.00112815
Duffbrown - 11	Secondary	2025-04-25	2	14810	5693.95	14319.9	743166	7501.49	0.454	13.64	0.1353	0.010094	0.000201879	50.18	2.73423	0.382	0.013	0.966905	0.965053	0.0476263	1.04915	0.0674003	0.0199282	0.00108586
Duffbrown - 12	Secondary	2025-04-25	2	13450	4409.53	10627.4	779198	6155.87	0.337	13.98	0.1082	0.00790026	0.000158005	57.933	1.87096	0.3284	0.0087	0.79014	0.788521	0.0226805	0.781238	0.0326331	0.0172613	0.000557459
Duffbrown - 2	Secondary	2025-04-25	2	8440	3195.89	7671.35	424499	5527.92	0.1884	5.96	0.0754	0.0130222	0.000260444	50.2961	2.37827	0.378	0.014	0.908928	0.906519	0.0452444	1.03577	0.0622122	0.0198823	0.000940139
Duffbrown - 3	Secondary	2025-04-25	2	14050	4116.23	9594.31	868561	6188.5	0.257	13.08	0.0912	0.007125	0.0001425	61.8193	2.10328	0.2915	0.0073	0.682869	0.681304	0.024682	0.649861	0.0274539	0.0161762	0.000550362
Duffbrown - 4	Secondary	2025-04-25	2	13800	3721.8	8602.14	925734	4115.49	0.238	14.36	0.0617	0.00444565	8.8913e-05	67.0821	2.19123	0.2703	0.008	0.623344	0.622329	0.0245858	0.555322	0.0244781	0.0149071	0.000486939
Duffbrown - 5	Secondary	2025-04-25	2	32130	7484.06	16744	2.36548e+06	2642.83	0.4841	37.92	0.0417	0.00111725	2.23449e-05	73.6223	2.06892	0.2338	0.0041	0.521133	0.520862	0.0118013	0.437664	0.0144974	0.0135828	0.000381702
Duffbrown - 6	Secondary	2025-04-25	2	30010	6685.08	14667.6	2.28043e+06	3645.86	0.4358	37.87	0.0595	0.00159876	3.19752e-05	75.9889	2.32552	0.2235	0.0037	0.488758	0.488363	0.011339	0.405353	0.0141039	0.0131598	0.000402735
Duffbrown - 7	Secondary	2025-04-25	2	33860	6705.31	14544.9	2.67389e+06	2152.92	0.454	46.25	0.0362	0.000805165	1.61033e-05	78.9689	2.24769	0.1982	0.0043	0.42956	0.429353	0.0123824	0.345902	0.0123794	0.0126632	0.000360434
Duffbrown - 8	Secondary	2025-04-25	2	15890	4065.66	9277.22	1.10126e+06	6067.14	0.2987	19.93	0.1076	0.00550926	0.000110185	69.3054	2.4202	0.2571	0.0077	0.58384	0.582554	0.0188989	0.511259	0.0235203	0.0144289	0.000503869
Duffbrown - 9	Secondary	2025-04-25	2	19040	6806.45	16580.4	1.00897e+06	6852.82	0.526	17.83	0.1205	0.00679188	0.000135838	52.9923	2.14432	0.3569	0.0079	0.870817	0.869503	0.0245825	0.928196	0.0428115	0.0188707	0.000763599
RA138 - 1	Secondary	2025-04-25	2	24850	7797.58	17235	339898	1946.94	0.418	4.62	0.0234	0.00572799	0.00011456	13.678	0.417099	0.3116	0.008	0.69356	0.692356	0.0217328	3.13965	0.125155	0.0731101	0.00222943
RA138 - 10	Secondary	2025-04-25	2	25230	11155.3	26082.6	258092	3150.22	0.824	4.563	0.0545	0.0122058	0.000244116	10.2296	0.390412	0.439	0.012	1.03379	1.03185	0.0332476	5.91444	0.277649	0.097756	0.00373086
RA138 - 11	Secondary	2025-04-25	2	21880	7210.99	15854.1	275374	2031.95	0.504	4.976	0.0354	0.00737885	0.000147577	12.5857	0.644139	0.325	0.015	0.724595	0.723083	0.0403099	3.55888	0.245269	0.0794555	0.00406656
RA138 - 12	Secondary	2025-04-25	2	21140	6695.2	14698.3	288427	4357.68	0.4663	5.146	0.076	0.0151084	0.000302169	13.6437	0.429054	0.3175	0.0058	0.695284	0.692143	0.0167712	3.20714	0.116637	0.073294	0.00230488
RA138 - 2	Secondary	2025-04-25	2	21920	3408.28	6106.4	384884	1508.41	0.1486	5.251	0.0175	0.00391912	7.83824e-05	17.5586	0.525263	0.1545	0.004	0.278577	0.277508	0.0105407	1.21268	0.0479766	0.0569523	0.00170372
RA138 - 3	Secondary	2025-04-25	2	25780	4662.37	8673.74	432611	1090.86	0.231	6.511	0.0146	0.00252156	5.04312e-05	16.7809	0.642845	0.178	0.012	0.336452	0.335788	0.0238105	1.46188	0.113353	0.0595916	0.00228284
RA138 - 4	Secondary	2025-04-25	2	14800	3833.05	8121.41	214295	454.079	0.23	3.61	0.00614	0.00211894	4.23789e-05	14.4794	0.776307	0.263	0.023	0.548744	0.548257	0.0637429	2.50329	0.256785	0.0690637	0.00370283
RA138 - 5	Secondary	2025-04-25	2	16330	3286.92	6239.37	271103	759.291	0.185	4.49	0.01132	0.00280074	5.60149e-05	16.6016	0.502654	0.2	0.01	0.38208	0.381367	0.0282524	1.6603	0.0970493	0.0602353	0.00182378
RA138 - 6	Secondary	2025-04-25	2	11690	3539.76	7896.38	160704	3694.47	0.246	2.765	0.0626	0.0229892	0.000459785	13.7472	0.448263	0.304	0.01	0.675482	0.670579	0.0260838	3.04766	0.14116	0.0727422	0.00237195
RA138 - 7	Secondary	2025-04-25	2	16150	4278.05	8929.45	243572	4596.47	0.287	4.379	0.0803	0.0188711	0.000377422	15.0819	0.575102	0.264	0.018	0.552907	0.548582	0.0378305	2.41243	0.18846	0.0663049	0.00252834
RA138 - 8	Secondary	2025-04-25	2	20530	3886.65	7425.87	335705	7315.2	0.2374	6.03	0.13	0.0217906	0.000435812	16.3519	0.510593	0.1888	0.0042	0.361708	0.356063	0.0115685	1.59125	0.0610074	0.061155	0.00190958
RA138 - 9	Secondary	2025-04-25	2	17140	2619.42	4459.61	303453	1728.58	0.141	5.336	0.0293	0.00569637	0.000113927	17.7044	0.531811	0.1528	0.0067	0.260187	0.25863	0.0178123	1.18946	0.0632202	0.0564833	0.00169667

## Sheet: Notes
1. Uncertainties include instrumental drift and were increased in quadrature to include uncertainties on WC-1, Final quoted uncertainties in Tera Wasserburg plots are increased in quadrature to include 2% long-term reproducibility
2. Concentration uncertainty c.20%
3. Calculated common 208Pb/ 206Pb calculated as per Parrish et al., 2018
WC-1 correction factor summary
Date	Run	WC-1 age	Uncertainty	Correction factor
2025-04-25	2	276.2	2.2	1.087
Secondary reference materials summary		64	64 ± 0.7 Ma (Hill et al., 2016)
Date	Run	Duff Brown age (Ma)	Uncertainty	MSWD	Reproducibility
2025-04-25	2	62.2	1.1	0.5	0.971875
		321.99	321.99 ± 0.65 Ma (Guillong et al., 2024)
Date	Run	RA138 age (Ma)	Uncertainty	MSWD	Reproducibility
2025-04-25	2	312	6.4	0.8	0.968974
References
Hill, C. A., Polyak, V. J., Asmerom, Y., and Provencio, P. (2016) Constraints on a Late Cretaceous uplift, denudation, and incision of the Grand Canyon region, southwestern Colorado Plateau, USA, from U‐Pb dating of lacustrine limestone. Tectonics, 35(4), 896–906.
Parrish, R.R., Parrish, C.M. and Lasalle, S. (2018) Vein calcite dating reveals Pyrenean orogen as cause of Paleogene deformation in southern England. J. Geol. Soc., 175, 425–442.
Guillong, M., Samankassou, E., Müller, I. A., Szymanowski, D., Looser, N., Tavazzani, L., ... & Ovtcharova, M. (2024). RA138 calcite U–Pb LA-ICP-MS primary reference material. Geochronology, 6(3), 465-474.
